# Supplementary material for: Hypertension management in rural western Kenya: a needs-based health workforce estimation model
Source: Hum Resour Health. 2019 Jul 16;17:57. doi: 10.1186/s12960-019-0389-x (PMC6636021; doi:10.1186/s12960-019-0389-x)
Supplement: Supplementary file 1 — Draft Excel model 20160508 BACKUP. (XLSX 677 kb) [file 12960_2019_389_MOESM1_ESM.xlsx]

## Sheet: Summary
			Enter Inputs	Demand: Enter based on number enrolled in care at each time point							Summary Table
								Enrollees/month			Number enrolled per month, Year 1	83.3333
					# at End Year 1	1000		83.3333			Number enrolled total, end of Year 1	1000
					# at End Year 2	3000		166.667
					# at End Year 3	7000		333.333			Number enrolled per month, Year 2	166.667
											Number enrolled total, end of Year 2	3000
					OR
											Percentage Increase Year 2 from Year 1	2
				Demand: Enter based on number enrolling per month:							Number enrolled per month, Year 3	333.333
						0					Number enrolled total, end of Year 3	7000
											Percentage Increase Year 3 from Year 1	4
				Enter distribution of patients at enrollment:
					Nq6	0.05
					Nq2	0.2
					Nq1	0.3
					Cq2	0.25
					Cq1	0.1
					Pq1	0.1
					Total	1
	Worksheet D: Summary of workforce capacity and requirements in hypertension program in Rural Western Kenya
			Staff Capacity		End Year 1		End Year 2		End Year 3
	Staff member	Visits per day per 1 FTE	Visits per year per 1 FTE	Visits per month	Visits/month required	FTE required	Visits/month required	FTE required	Visits/month required	FTE required
	Physician	10	1000	83.3333	96.4583	1.1575	259.167	3.11	551.25	6.615
	Clinical Officer	30	3000	250	263.547	1.05419	840.521	3.36208	1990.56	7.96226
	Nurse*	40.8163	4081.63	340.136	388.229	1.14139	1094.45	3.21767	2444.34	7.18635
	Pharmacist	50	5000	416.667	739.485	1.77476	2162.34	5.18961	4901	11.7624
	Triage Staff/Technician	50	5000	416.667	746.568	1.79176	2189.13	5.25392	4974.48	11.9388
		Work days/year:	100
	*Based on our time motion study, nurses take 8.82 min/encounter, and they see patients for 6 hours (360 min) a day.

## Sheet: Calculations
Worksheet A: Visit schedule for all patients enrolled in hypertension program
Starting Category	#	Possible Outcomes		Enrollment month	1	2	3	4	5	6	7	8	9	10	11	12	13	14	15	16	17	18	19	20	21	22	23	24	25	26	27	28	29	30	31	32	33	34	35	36
Nq6	1	No change (Nq6)	0.005	ALL	2	0	0	0	0	0	2	0	0	0	0	0	2	0	0	0	0	0	2	0	0	0	0	0	2	0	0	0	0	0	2	0	0	0	0	0
				Physician
				Clinical Officer
				Nurse	1						1						1						1						1						1
				Pharmacist
				Triage Staff/Technician	1						1						1						1						1						1
Nq6	2	Worsen (Nq1) - improve (Nq6)	0.005	ALL	2	0	0	0	0	0	3	3	3	3	3	3	2	0	0	0	0	0	2	0	0	0	0	0	2	0	0	0	0	0	2	0	0	0	0	0
				Physician
				Clinical Officer
				Nurse	1						1	1	1	1	1	1	1						1						1						1
				Pharmacist							1	1	1	1	1	1
				Triage Staff/Technician	1						1	1	1	1	1	1	1						1						1						1
Nq6	3	Worsen (Nq1) - improve (Nq6)	0.005	ALL	2	0	0	0	0	0	2	0	0	0	0	0	3	3	3	3	3	3	2	0	0	0	0	0	2	0	0	0	0	0	2	0	0	0	0	0
				Physician
				Clinical Officer
				Nurse	1						1						1	1	1	1	1	1	1						1						1
				Pharmacist													1	1	1	1	1	1
				Triage Staff/Technician	1						1						1	1	1	1	1	1	1						1						1
Nq6	4	Worsen (Nq1) - improve (Nq6)	0.005	ALL	2	0	0	0	0	0	2	0	0	0	0	0	2	0	0	0	0	0	3	3	3	3	3	3	2	0	0	0	0	0	2	0	0	0	0	0
				Physician
				Clinical Officer
				Nurse	1						1						1						1	1	1	1	1	1	1						1
				Pharmacist																			1	1	1	1	1	1
				Triage Staff/Technician	1						1						1						1	1	1	1	1	1	1						1
Nq6	5	Worsen (Nq1) - improve (Nq6)	0.005	ALL	2	0	0	0	0	0	2	0	0	0	0	0	2	0	0	0	0	0	2	0	0	0	0	0	3	3	3	3	3	3	2	0	0	0	0	0
				Physician
				Clinical Officer
				Nurse	1						1						1						1						1	1	1	1	1	1	1
				Pharmacist																									1	1	1	1	1	1
				Triage Staff/Technician	1						1						1						1						1	1	1	1	1	1	1
Nq6	6	Worsen (Nq1) - improve (Nq6)	0.005	ALL	2	0	0	0	0	0	2	0	0	0	0	0	2	0	0	0	0	0	2	0	0	0	0	0	2	0	0	0	0	0	3	3	3	3	3	3
				Physician
				Clinical Officer
				Nurse	1						1						1						1						1						1	1	1	1	1	1
				Pharmacist																															1	1	1	1	1	1
				Triage Staff/Technician	1						1						1						1						1						1	1	1	1	1	1
Nq6	7	Worsen (Nq1) - improve (Nq2)	0.005	ALL	2	0	0	0	0	0	3	3	3	3	3	3	3	0	3	0	3	0	3	0	3	0	3	0	3	0	3	0	3	0	3	0	3	0	3	0
				Physician
				Clinical Officer
				Nurse	1						1	1	1	1	1	1	1		1		1		1		1		1		1		1		1		1		1		1
				Pharmacist							1	1	1	1	1	1	1		1		1		1		1		1		1		1		1		1		1		1
				Triage Staff/Technician	1						1	1	1	1	1	1	1		1		1		1		1		1		1		1		1		1		1		1
Nq6	8	Worsen (Nq1) - improve (Nq2)	0.005	ALL	2	0	0	0	0	0	2	0	0	0	0	0	3	3	3	3	3	3	3	0	3	0	3	0	3	0	3	0	3	0	3	0	3	0	3	0
				Physician
				Clinical Officer
				Nurse	1						1						1	1	1	1	1	1	1		1		1		1		1		1		1		1		1
				Pharmacist													1	1	1	1	1	1	1		1		1		1		1		1		1		1		1
				Triage Staff/Technician	1						1						1	1	1	1	1	1	1		1		1		1		1		1		1		1		1
Nq6	9	Worsen (Nq1) - improve (Nq2)	0.005	ALL	2	0	0	0	0	0	2	0	0	0	0	0	2	0	0	0	0	0	3	3	3	3	3	3	3	0	3	0	3	0	3	0	3	0	3	0
				Physician
				Clinical Officer
				Nurse	1						1						1						1	1	1	1	1	1	1		1		1		1		1		1
				Pharmacist																			1	1	1	1	1	1	1		1		1		1		1		1
				Triage Staff/Technician	1						1						1						1	1	1	1	1	1	1		1		1		1		1		1
Nq6	10	Worsen (Nq1) - improve (Nq2)	0.005	ALL	2	0	0	0	0	0	2	0	0	0	0	0	2	0	0	0	0	0	2	0	0	0	0	0	3	3	3	3	3	3	3	0	3	0	3	0
				Physician
				Clinical Officer
				Nurse	1						1						1						1						1	1	1	1	1	1	1		1		1
				Pharmacist																									1	1	1	1	1	1	1		1		1
				Triage Staff/Technician	1						1						1						1						1	1	1	1	1	1	1		1		1
Nq2	11	No change (Nq2)	0.0105263	ALL	3	0	3	0	3	0	3	0	3	0	3	0	3	0	3	0	3	0	3	0	3	0	3	0	3	0	3	0	3	0	3	0	3	0	3	0
				Physician
				Clinical Officer
				Nurse	1		1		1		1		1		1		1		1		1		1		1		1		1		1		1		1		1		1
				Pharmacist	1		1		1		1		1		1		1		1		1		1		1		1		1		1		1		1		1		1
				Triage Staff/Technician	1		1		1		1		1		1		1		1		1		1		1		1		1		1		1		1		1		1
Nq2	12	Worsen (Nq1) - improve (Nq6)	0.0105263	ALL	3	0	3	0	3	0	3	3	3	3	3	3	2	0	0	0	0	0	2	0	0	0	0	0	2	0	0	0	0	0	2	0	0	0	0	0
				Physician
				Clinical Officer
				Nurse	1		1		1		1	1	1	1	1	1	1						1						1						1
				Pharmacist	1		1		1		1	1	1	1	1	1
				Triage Staff/Technician	1		1		1		1	1	1	1	1	1	1						1						1						1
Nq2	13	Worsen (Nq1) - improve (Nq6)	0.0105263	ALL	3	0	3	0	3	0	3	0	3	0	3	0	3	3	3	3	3	3	2	0	0	0	0	0	2	0	0	0	0	0	2	0	0	0	0	0
				Physician
				Clinical Officer
				Nurse	1		1		1		1		1		1		1	1	1	1	1	1	1						1						1
				Pharmacist	1		1		1		1		1		1		1	1	1	1	1	1
				Triage Staff/Technician	1		1		1		1		1		1		1	1	1	1	1	1	1						1						1
Nq2	14	Worsen (Nq1) - improve (Nq6)	0.0105263	ALL	3	0	3	0	3	0	3	0	3	0	3	0	3	0	3	0	3	0	3	3	3	3	3	3	2	0	0	0	0	0	2	0	0	0	0	0
				Physician
				Clinical Officer
				Nurse	1		1		1		1		1		1		1		1		1		1	1	1	1	1	1	1						1
				Pharmacist	1		1		1		1		1		1		1		1		1		1	1	1	1	1	1
				Triage Staff/Technician	1		1		1		1		1		1		1		1		1		1	1	1	1	1	1	1						1
Nq2	15	Worsen (Nq1) - improve (Nq6)	0.0105263	ALL	3	0	3	0	3	0	3	0	3	0	3	0	3	0	3	0	3	0	3	0	3	0	3	0	3	3	3	3	3	3	2	0	0	0	0	0
				Physician
				Clinical Officer
				Nurse	1		1		1		1		1		1		1		1		1		1		1		1		1	1	1	1	1	1	1
				Pharmacist	1		1		1		1		1		1		1		1		1		1		1		1		1	1	1	1	1	1
				Triage Staff/Technician	1		1		1		1		1		1		1		1		1		1		1		1		1	1	1	1	1	1	1
Nq2	16	Worsen (Nq1) - improve (Nq6)	0.0105263	ALL	3	0	3	0	3	0	3	0	3	0	3	0	3	0	3	0	3	0	3	0	3	0	3	0	3	0	3	0	3	0	3	3	3	3	3	3
				Physician
				Clinical Officer
				Nurse	1		1		1		1		1		1		1		1		1		1		1		1		1		1		1		1	1	1	1	1	1
				Pharmacist	1		1		1		1		1		1		1		1		1		1		1		1		1		1		1		1	1	1	1	1	1
				Triage Staff/Technician	1		1		1		1		1		1		1		1		1		1		1		1		1		1		1		1	1	1	1	1	1
Nq2	17	Worsen (Nq1) - improve (Nq2)	0.0105263	ALL	3	0	3	0	3	0	3	3	3	3	3	3	3	0	3	0	3	0	3	0	3	0	3	0	3	0	3	0	3	0	3	0	3	0	3	0
				Physician
				Clinical Officer
				Nurse	1		1		1		1	1	1	1	1	1	1		1		1		1		1		1		1		1		1		1		1		1
				Pharmacist	1		1		1		1	1	1	1	1	1	1		1		1		1		1		1		1		1		1		1		1		1
				Triage Staff/Technician	1		1		1		1	1	1	1	1	1	1		1		1		1		1		1		1		1		1		1		1		1
Nq2	18	Worsen (Nq1) - improve (Nq2)	0.0105263	ALL	3	0	3	0	3	0	3	0	3	0	3	0	3	3	3	3	3	3	3	0	3	0	3	0	3	0	3	0	3	0	3	0	3	0	3	0
				Physician
				Clinical Officer
				Nurse	1		1		1		1		1		1		1	1	1	1	1	1	1		1		1		1		1		1		1		1		1
				Pharmacist	1		1		1		1		1		1		1	1	1	1	1	1	1		1		1		1		1		1		1		1		1
				Triage Staff/Technician	1		1		1		1		1		1		1	1	1	1	1	1	1		1		1		1		1		1		1		1		1
Nq2	19	Worsen (Nq1) - improve (Nq2)	0.0105263	ALL	3	0	3	0	3	0	3	0	3	0	3	0	3	0	3	0	3	0	3	3	3	3	3	3	3	0	3	0	3	0	3	0	3	0	3	0
				Physician
				Clinical Officer
				Nurse	1		1		1		1		1		1		1		1		1		1	1	1	1	1	1	1		1		1		1		1		1
				Pharmacist	1		1		1		1		1		1		1		1		1		1	1	1	1	1	1	1		1		1		1		1		1
				Triage Staff/Technician	1		1		1		1		1		1		1		1		1		1	1	1	1	1	1	1		1		1		1		1		1
Nq2	20	Worsen (Nq1) - improve (Nq2)	0.0105263	ALL	3	0	3	0	3	0	3	0	3	0	3	0	3	0	3	0	3	0	3	0	3	0	3	0	3	3	3	3	3	3	3	0	3	0	3	0
				Physician
				Clinical Officer
				Nurse	1		1		1		1		1		1		1		1		1		1		1		1		1	1	1	1	1	1	1		1		1
				Pharmacist	1		1		1		1		1		1		1		1		1		1		1		1		1	1	1	1	1	1	1		1		1
				Triage Staff/Technician	1		1		1		1		1		1		1		1		1		1		1		1		1	1	1	1	1	1	1		1		1
Nq2	21	Worsen (Cq1) - improve (Nq2)	0.0105263	ALL	3	0	3	0	3	0	3	3	3	3	3	3	3	0	3	0	3	0	3	0	3	0	3	0	3	0	3	0	3	0	3	0	3	0	3	0
				Physician
				Clinical Officer							1	1	1	1	1	1
				Nurse	1		1		1								1		1		1		1		1		1		1		1		1		1		1		1
				Pharmacist	1		1		1		1	1	1	1	1	1	1		1		1		1		1		1		1		1		1		1		1		1
				Triage Staff/Technician	1		1		1		1	1	1	1	1	1	1		1		1		1		1		1		1		1		1		1		1		1
Nq2	22	Worsen (Cq1) - improve (Nq2)	0.0105263	ALL	3	0	3	0	3	0	3	0	3	0	3	0	3	3	3	3	3	3	3	0	3	0	3	0	3	0	3	0	3	0	3	0	3	0	3	0
				Physician
				Clinical Officer													1	1	1	1	1	1
				Nurse	1		1		1		1		1		1								1		1		1		1		1		1		1		1		1
				Pharmacist	1		1		1		1		1		1		1	1	1	1	1	1	1		1		1		1		1		1		1		1		1
				Triage Staff/Technician	1		1		1		1		1		1		1	1	1	1	1	1	1		1		1		1		1		1		1		1		1
Nq2	23	Worsen (Cq1) - improve (Nq2)	0.0105263	ALL	3	0	3	0	3	0	3	0	3	0	3	0	3	0	3	0	3	0	3	3	3	3	3	3	3	0	3	0	3	0	3	0	3	0	3	0
				Physician
				Clinical Officer																			1	1	1	1	1	1
				Nurse	1		1		1		1		1		1		1		1		1								1		1		1		1		1		1
				Pharmacist	1		1		1		1		1		1		1		1		1		1	1	1	1	1	1	1		1		1		1		1		1
				Triage Staff/Technician	1		1		1		1		1		1		1		1		1		1	1	1	1	1	1	1		1		1		1		1		1
Nq2	24	Worsen (Cq1) - improve (Nq2)	0.0105263	ALL	3	0	3	0	3	0	3	0	3	0	3	0	3	0	3	0	3	0	3	0	3	0	3	0	3	3	3	3	3	3	3	0	3	0	3	0
				Physician
				Clinical Officer																									1	1	1	1	1	1
				Nurse	1		1		1		1		1		1		1		1		1		1		1		1								1		1		1
				Pharmacist	1		1		1		1		1		1		1		1		1		1		1		1		1	1	1	1	1	1	1		1		1
				Triage Staff/Technician	1		1		1		1		1		1		1		1		1		1		1		1		1	1	1	1	1	1	1		1		1
Nq2	25	Worsen (Cq1) - improve (Nq2)	0.0105263	ALL	3	0	3	0	3	0	3	0	3	0	3	0	3	0	3	0	3	0	3	0	3	0	3	0	3	0	3	0	3	0	3	3	3	3	3	3
				Physician
				Clinical Officer																															1	1	1	1	1	1
				Nurse	1		1		1		1		1		1		1		1		1		1		1		1		1		1		1
				Pharmacist	1		1		1		1		1		1		1		1		1		1		1		1		1		1		1		1	1	1	1	1	1
				Triage Staff/Technician	1		1		1		1		1		1		1		1		1		1		1		1		1		1		1		1	1	1	1	1	1
Nq2	26	Worsen (Cq1) - improve (Cq2)	0.0105263	ALL	3	0	3	0	3	0	3	3	3	3	3	3	3	0	3	0	3	0	3	0	3	0	3	0	3	0	3	0	3	0	3	0	3	0	3	0
				Physician
				Clinical Officer							1	1	1	1	1	1	1		1		1		1		1		1		1		1		1		1		1		1
				Nurse	1		1		1
				Pharmacist	1		1		1		1	1	1	1	1	1	1		1		1		1		1		1		1		1		1		1		1		1
				Triage Staff/Technician	1		1		1		1	1	1	1	1	1	1		1		1		1		1		1		1		1		1		1		1		1
Nq2	27	Worsen (Cq1) - improve (Cq2)	0.0105263	ALL	3	0	3	0	3	0	3	0	3	0	3	0	3	3	3	3	3	3	3	0	3	0	3	0	3	0	3	0	3	0	3	0	3	0	3	0
				Physician
				Clinical Officer													1	1	1	1	1	1	1		1		1		1		1		1		1		1		1
				Nurse	1		1		1		1		1		1
				Pharmacist	1		1		1		1		1		1		1	1	1	1	1	1	1		1		1		1		1		1		1		1		1
				Triage Staff/Technician	1		1		1		1		1		1		1	1	1	1	1	1	1		1		1		1		1		1		1		1		1
Nq2	28	Worsen (Cq1) - improve (Cq2)	0.0105263	ALL	3	0	3	0	3	0	3	0	3	0	3	0	3	0	3	0	3	0	3	3	3	3	3	3	3	0	3	0	3	0	3	0	3	0	3	0
				Physician
				Clinical Officer																			1	1	1	1	1	1	1		1		1		1		1		1
				Nurse	1		1		1		1		1		1		1		1		1
				Pharmacist	1		1		1		1		1		1		1		1		1		1	1	1	1	1	1	1		1		1		1		1		1
				Triage Staff/Technician	1		1		1		1		1		1		1		1		1		1	1	1	1	1	1	1		1		1		1		1		1
Nq2	29	Worsen (Cq1) - improve (Cq2)	0.0105263	ALL	3	0	3	0	3	0	3	0	3	0	3	0	3	0	3	0	3	0	3	0	3	0	3	0	3	3	3	3	3	3	3	0	3	0	3	0
				Physician
				Clinical Officer																									1	1	1	1	1	1	1		1		1
				Nurse	1		1		1		1		1		1		1		1		1		1		1		1
				Pharmacist	1		1		1		1		1		1		1		1		1		1		1		1		1	1	1	1	1	1	1		1		1
				Triage Staff/Technician	1		1		1		1		1		1		1		1		1		1		1		1		1	1	1	1	1	1	1		1		1
Nq1	30	No change (Nq1)	0.015	ALL	3	3	3	3	3	3	3	3	3	3	3	3	3	3	3	3	3	3	3	3	3	3	3	3	3	3	3	3	3	3	3	3	3	3	3	3
				Physician
				Clinical Officer
				Nurse	1	1	1	1	1	1	1	1	1	1	1	1	1	1	1	1	1	1	1	1	1	1	1	1	1	1	1	1	1	1	1	1	1	1	1	1
				Pharmacist	1	1	1	1	1	1	1	1	1	1	1	1	1	1	1	1	1	1	1	1	1	1	1	1	1	1	1	1	1	1	1	1	1	1	1	1
				Triage Staff/Technician	1	1	1	1	1	1	1	1	1	1	1	1	1	1	1	1	1	1	1	1	1	1	1	1	1	1	1	1	1	1	1	1	1	1	1	1
Nq1	31	Improve (Nq6)	0.015	ALL	3	3	3	3	3	3	2	0	0	0	0	0	2	0	0	0	0	0	2	0	0	0	0	0	2	0	0	0	0	0	2	0	0	0	0	0
				Physician
				Clinical Officer
				Nurse	1	1	1	1	1	1	1						1						1						1						1
				Pharmacist	1	1	1	1	1	1
				Triage Staff/Technician	1	1	1	1	1	1	1						1						1						1						1
Nq1	32	Improve (Nq6)	0.015	ALL	3	3	3	3	3	3	3	3	3	3	3	3	2	0	0	0	0	0	2	0	0	0	0	0	2	0	0	0	0	0	2	0	0	0	0	0
				Physician
				Clinical Officer
				Nurse	1	1	1	1	1	1	1	1	1	1	1	1	1						1						1						1
				Pharmacist	1	1	1	1	1	1	1	1	1	1	1	1
				Triage Staff/Technician	1	1	1	1	1	1	1	1	1	1	1	1	1						1						1						1
Nq1	33	Improve (Nq6)	0.015	ALL	3	3	3	3	3	3	3	3	3	3	3	3	3	3	3	3	3	3	2	0	0	0	0	0	2	0	0	0	0	0	2	0	0	0	0	0
				Physician
				Clinical Officer
				Nurse	1	1	1	1	1	1	1	1	1	1	1	1	1	1	1	1	1	1	1						1						1
				Pharmacist	1	1	1	1	1	1	1	1	1	1	1	1	1	1	1	1	1	1
				Triage Staff/Technician	1	1	1	1	1	1	1	1	1	1	1	1	1	1	1	1	1	1	1						1						1
Nq1	34	Improve (Nq6)	0.015	ALL	3	3	3	3	3	3	3	3	3	3	3	3	3	3	3	3	3	3	3	3	3	3	3	3	2	0	0	0	0	0	2	0	0	0	0	0
				Physician
				Clinical Officer
				Nurse	1	1	1	1	1	1	1	1	1	1	1	1	1	1	1	1	1	1	1	1	1	1	1	1	1						1
				Pharmacist	1	1	1	1	1	1	1	1	1	1	1	1	1	1	1	1	1	1	1	1	1	1	1	1
				Triage Staff/Technician	1	1	1	1	1	1	1	1	1	1	1	1	1	1	1	1	1	1	1	1	1	1	1	1	1						1
Nq1	35	Improve (Nq6)	0.015	ALL	3	3	3	3	3	3	3	3	3	3	3	3	3	3	3	3	3	3	3	3	3	3	3	3	3	3	3	3	3	3	2	0	0	0	0	0
				Physician
				Clinical Officer
				Nurse	1	1	1	1	1	1	1	1	1	1	1	1	1	1	1	1	1	1	1	1	1	1	1	1	1	1	1	1	1	1	1
				Pharmacist	1	1	1	1	1	1	1	1	1	1	1	1	1	1	1	1	1	1	1	1	1	1	1	1	1	1	1	1	1	1
				Triage Staff/Technician	1	1	1	1	1	1	1	1	1	1	1	1	1	1	1	1	1	1	1	1	1	1	1	1	1	1	1	1	1	1	1
Nq1	36	Improve (Nq2)	0.015	ALL	3	3	3	3	3	3	3	0	3	0	3	0	3	0	3	0	3	0	3	0	3	0	3	0	3	0	3	0	3	0	3	0	3	0	3	0
				Physician
				Clinical Officer
				Nurse	1	1	1	1	1	1	1		1		1		1		1		1		1		1		1		1		1		1		1		1		1
				Pharmacist	1	1	1	1	1	1	1		1		1		1		1		1		1		1		1		1		1		1		1		1		1
				Triage Staff/Technician	1	1	1	1	1	1	1		1		1		1		1		1		1		1		1		1		1		1		1		1		1
Nq1	37	Improve (Nq2)	0.015	ALL	3	3	3	3	3	3	3	3	3	3	3	3	3	0	3	0	3	0	3	0	3	0	3	0	3	0	3	0	3	0	3	0	3	0	3	0
				Physician
				Clinical Officer
				Nurse	1	1	1	1	1	1	1	1	1	1	1	1	1		1		1		1		1		1		1		1		1		1		1		1
				Pharmacist	1	1	1	1	1	1	1	1	1	1	1	1	1		1		1		1		1		1		1		1		1		1		1		1
				Triage Staff/Technician	1	1	1	1	1	1	1	1	1	1	1	1	1		1		1		1		1		1		1		1		1		1		1		1
Nq1	38	Improve (Nq2)	0.015	ALL	3	3	3	3	3	3	3	3	3	3	3	3	3	3	3	3	3	3	3	0	3	0	3	0	3	0	3	0	3	0	3	0	3	0	3	0
				Physician
				Clinical Officer
				Nurse	1	1	1	1	1	1	1	1	1	1	1	1	1	1	1	1	1	1	1		1		1		1		1		1		1		1		1
				Pharmacist	1	1	1	1	1	1	1	1	1	1	1	1	1	1	1	1	1	1	1		1		1		1		1		1		1		1		1
				Triage Staff/Technician	1	1	1	1	1	1	1	1	1	1	1	1	1	1	1	1	1	1	1		1		1		1		1		1		1		1		1
Nq1	39	Improve (Nq2)	0.015	ALL	3	3	3	3	3	3	3	3	3	3	3	3	3	3	3	3	3	3	3	3	3	3	3	3	3	0	3	0	3	0	3	0	3	0	3	0
				Physician
				Clinical Officer
				Nurse	1	1	1	1	1	1	1	1	1	1	1	1	1	1	1	1	1	1	1	1	1	1	1	1	1		1		1		1		1		1
				Pharmacist	1	1	1	1	1	1	1	1	1	1	1	1	1	1	1	1	1	1	1	1	1	1	1	1	1		1		1		1		1		1
				Triage Staff/Technician	1	1	1	1	1	1	1	1	1	1	1	1	1	1	1	1	1	1	1	1	1	1	1	1	1		1		1		1		1		1
Nq1	40	Improve (Nq2)	0.015	ALL	3	3	3	3	3	3	3	3	3	3	3	3	3	3	3	3	3	3	3	3	3	3	3	3	3	3	3	3	3	3	3	0	3	0	3	0
				Physician
				Clinical Officer
				Nurse	1	1	1	1	1	1	1	1	1	1	1	1	1	1	1	1	1	1	1	1	1	1	1	1	1	1	1	1	1	1	1		1		1
				Pharmacist	1	1	1	1	1	1	1	1	1	1	1	1	1	1	1	1	1	1	1	1	1	1	1	1	1	1	1	1	1	1	1		1		1
				Triage Staff/Technician	1	1	1	1	1	1	1	1	1	1	1	1	1	1	1	1	1	1	1	1	1	1	1	1	1	1	1	1	1	1	1		1		1
Nq1	41	Worsen (Cq1) - improve (Nq2)	0.015	ALL	3	3	3	3	3	3	3	3	3	3	3	3	3	0	3	0	3	0	3	0	3	0	3	0	3	0	3	0	3	0	3	0	3	0	3	0
				Physician
				Clinical Officer							1	1	1	1	1	1
				Nurse	1	1	1	1	1	1							1		1		1		1		1		1		1		1		1		1		1		1
				Pharmacist	1	1	1	1	1	1	1	1	1	1	1	1	1		1		1		1		1		1		1		1		1		1		1		1
				Triage Staff/Technician	1	1	1	1	1	1	1	1	1	1	1	1	1		1		1		1		1		1		1		1		1		1		1		1
Nq1	42	Worsen (Cq1) - improve (Nq2)	0.015	ALL	3	3	3	3	3	3	3	3	3	3	3	3	3	3	3	3	3	3	3	0	3	0	3	0	3	0	3	0	3	0	3	0	3	0	3	0
				Physician
				Clinical Officer													1	1	1	1	1	1
				Nurse	1	1	1	1	1	1	1	1	1	1	1	1							1		1		1		1		1		1		1		1		1
				Pharmacist	1	1	1	1	1	1	1	1	1	1	1	1	1	1	1	1	1	1	1		1		1		1		1		1		1		1		1
				Triage Staff/Technician	1	1	1	1	1	1	1	1	1	1	1	1	1	1	1	1	1	1	1		1		1		1		1		1		1		1		1
Nq1	43	Worsen (Cq1) - improve (Nq2)	0.015	ALL	3	3	3	3	3	3	3	3	3	3	3	3	3	3	3	3	3	3	3	3	3	3	3	3	3	0	3	0	3	0	3	0	3	0	3	0
				Physician
				Clinical Officer																			1	1	1	1	1	1
				Nurse	1	1	1	1	1	1	1	1	1	1	1	1	1	1	1	1	1	1							1		1		1		1		1		1
				Pharmacist	1	1	1	1	1	1	1	1	1	1	1	1	1	1	1	1	1	1	1	1	1	1	1	1	1		1		1		1		1		1
				Triage Staff/Technician	1	1	1	1	1	1	1	1	1	1	1	1	1	1	1	1	1	1	1	1	1	1	1	1	1		1		1		1		1		1
Nq1	44	Worsen (Cq1) - improve (Nq2)	0.015	ALL	3	3	3	3	3	3	3	3	3	3	3	3	3	3	3	3	3	3	3	3	3	3	3	3	3	3	3	3	3	3	3	0	3	0	3	0
				Physician
				Clinical Officer																									1	1	1	1	1	1
				Nurse	1	1	1	1	1	1	1	1	1	1	1	1	1	1	1	1	1	1	1	1	1	1	1	1							1		1		1
				Pharmacist	1	1	1	1	1	1	1	1	1	1	1	1	1	1	1	1	1	1	1	1	1	1	1	1	1	1	1	1	1	1	1		1		1
				Triage Staff/Technician	1	1	1	1	1	1	1	1	1	1	1	1	1	1	1	1	1	1	1	1	1	1	1	1	1	1	1	1	1	1	1		1		1
Nq1	45	Worsen (Cq1) - improve (Nq2)	0.015	ALL	3	3	3	3	3	3	3	3	3	3	3	3	3	3	3	3	3	3	3	3	3	3	3	3	3	3	3	3	3	3	3	3	3	3	3	3
				Physician
				Clinical Officer																															1	1	1	1	1	1
				Nurse	1	1	1	1	1	1	1	1	1	1	1	1	1	1	1	1	1	1	1	1	1	1	1	1	1	1	1	1	1	1
				Pharmacist	1	1	1	1	1	1	1	1	1	1	1	1	1	1	1	1	1	1	1	1	1	1	1	1	1	1	1	1	1	1	1	1	1	1	1	1
				Triage Staff/Technician	1	1	1	1	1	1	1	1	1	1	1	1	1	1	1	1	1	1	1	1	1	1	1	1	1	1	1	1	1	1	1	1	1	1	1	1
Nq1	46	Worsen (Cq1) - improve (Cq2)	0.015	ALL	3	3	3	3	3	3	3	3	3	3	3	3	3	0	3	0	3	0	3	0	3	0	3	0	3	0	3	0	3	0	3	0	3	0	3	0
				Physician
				Clinical Officer							1	1	1	1	1	1	1		1		1		1		1		1		1		1		1		1		1		1
				Nurse	1	1	1	1	1	1
				Pharmacist	1	1	1	1	1	1	1	1	1	1	1	1	1		1		1		1		1		1		1		1		1		1		1		1
				Triage Staff/Technician	1	1	1	1	1	1	1	1	1	1	1	1	1		1		1		1		1		1		1		1		1		1		1		1
Nq1	47	Worsen (Cq1) - improve (Cq2)	0.015	ALL	3	3	3	3	3	3	3	3	3	3	3	3	3	3	3	3	3	3	3	0	3	0	3	0	3	0	3	0	3	0	3	0	3	0	3	0
				Physician
				Clinical Officer													1	1	1	1	1	1	1		1		1		1		1		1		1		1		1
				Nurse	1	1	1	1	1	1	1	1	1	1	1	1
				Pharmacist	1	1	1	1	1	1	1	1	1	1	1	1	1	1	1	1	1	1	1		1		1		1		1		1		1		1		1
				Triage Staff/Technician	1	1	1	1	1	1	1	1	1	1	1	1	1	1	1	1	1	1	1		1		1		1		1		1		1		1		1
Nq1	48	Worsen (Cq1) - improve (Cq2)	0.015	ALL	3	3	3	3	3	3	3	3	3	3	3	3	3	3	3	3	3	3	3	3	3	3	3	3	3	0	3	0	3	0	3	0	3	0	3	0
				Physician
				Clinical Officer																			1	1	1	1	1	1	1		1		1		1		1		1
				Nurse	1	1	1	1	1	1	1	1	1	1	1	1	1	1	1	1	1	1
				Pharmacist	1	1	1	1	1	1	1	1	1	1	1	1	1	1	1	1	1	1	1	1	1	1	1	1	1		1		1		1		1		1
				Triage Staff/Technician	1	1	1	1	1	1	1	1	1	1	1	1	1	1	1	1	1	1	1	1	1	1	1	1	1		1		1		1		1		1
Nq1	49	Worsen (Cq1) - improve (Cq2)	0.015	ALL	3	3	3	3	3	3	3	3	3	3	3	3	3	3	3	3	3	3	3	3	3	3	3	3	3	3	3	3	3	3	3	0	3	0	3	0
				Physician
				Clinical Officer																									1	1	1	1	1	1	1		1		1
				Nurse	1	1	1	1	1	1	1	1	1	1	1	1	1	1	1	1	1	1	1	1	1	1	1	1
				Pharmacist	1	1	1	1	1	1	1	1	1	1	1	1	1	1	1	1	1	1	1	1	1	1	1	1	1	1	1	1	1	1	1		1		1
				Triage Staff/Technician	1	1	1	1	1	1	1	1	1	1	1	1	1	1	1	1	1	1	1	1	1	1	1	1	1	1	1	1	1	1	1		1		1
Cq2	50	No change (Cq2)	0.025	ALL	3	0	3	0	3	0	3	0	3	0	3	0	3	0	3	0	3	0	3	0	3	0	3	0	3	0	3	0	3	0	3	0	3	0	3	0
				Physician
				Clinical Officer	1		1		1		1		1		1		1		1		1		1		1		1		1		1		1		1		1		1
				Nurse
				Pharmacist	1		1		1		1		1		1		1		1		1		1		1		1		1		1		1		1		1		1
				Triage Staff/Technician	1		1		1		1		1		1		1		1		1		1		1		1		1		1		1		1		1		1
Cq2	51	Worsen (Cq1) - improve (Nq2)	0.025	ALL	3	0	3	0	3	0	3	3	3	3	3	3	3	0	3	0	3	0	3	0	3	0	3	0	3	0	3	0	3	0	3	0	3	0	3	0
				Physician
				Clinical Officer	1		1		1		1	1	1	1	1	1
				Nurse													1		1		1		1		1		1		1		1		1		1		1		1
				Pharmacist	1		1		1		1	1	1	1	1	1	1		1		1		1		1		1		1		1		1		1		1		1
				Triage Staff/Technician	1		1		1		1	1	1	1	1	1	1		1		1		1		1		1		1		1		1		1		1		1
Cq2	52	Worsen (Cq1) - improve (Nq2)	0.025	ALL	3	0	3	0	3	0	3	0	3	0	3	0	3	3	3	3	3	3	3	0	3	0	3	0	3	0	3	0	3	0	3	0	3	0	3	0
				Physician
				Clinical Officer	1		1		1		1		1		1		1	1	1	1	1	1
				Nurse																			1		1		1		1		1		1		1		1		1
				Pharmacist	1		1		1		1		1		1		1	1	1	1	1	1	1		1		1		1		1		1		1		1		1
				Triage Staff/Technician	1		1		1		1		1		1		1	1	1	1	1	1	1		1		1		1		1		1		1		1		1
Cq2	53	Worsen (Cq1) - improve (Nq2)	0.025	ALL	3	0	3	0	3	0	3	0	3	0	3	0	3	0	3	0	3	0	3	3	3	3	3	3	3	0	3	0	3	0	3	0	3	0	3	0
				Physician
				Clinical Officer	1		1		1		1		1		1		1		1		1		1	1	1	1	1	1
				Nurse																									1		1		1		1		1		1
				Pharmacist	1		1		1		1		1		1		1		1		1		1	1	1	1	1	1	1		1		1		1		1		1
				Triage Staff/Technician	1		1		1		1		1		1		1		1		1		1	1	1	1	1	1	1		1		1		1		1		1
Cq2	54	Worsen (Cq1) - improve (Nq2)	0.025	ALL	3	0	3	0	3	0	3	0	3	0	3	0	3	0	3	0	3	0	3	0	3	0	3	0	3	3	3	3	3	3	3	0	3	0	3	0
				Physician
				Clinical Officer	1		1		1		1		1		1		1		1		1		1		1		1		1	1	1	1	1	1
				Nurse																															1		1		1
				Pharmacist	1		1		1		1		1		1		1		1		1		1		1		1		1	1	1	1	1	1	1		1		1
				Triage Staff/Technician	1		1		1		1		1		1		1		1		1		1		1		1		1	1	1	1	1	1	1		1		1
Cq2	55	Worsen (Cq1) - improve (Nq2)	0.025	ALL	3	0	3	0	3	0	3	0	3	0	3	0	3	0	3	0	3	0	3	0	3	0	3	0	3	0	3	0	3	0	3	3	3	3	3	3
				Physician
				Clinical Officer	1		1		1		1		1		1		1		1		1		1		1		1		1		1		1		1	1	1	1	1	1
				Nurse
				Pharmacist	1		1		1		1		1		1		1		1		1		1		1		1		1		1		1		1	1	1	1	1	1
				Triage Staff/Technician	1		1		1		1		1		1		1		1		1		1		1		1		1		1		1		1	1	1	1	1	1
Cq2	56	Worsen (Cq1) - improve (Cq2)	0.025	ALL	3	0	3	0	3	0	3	3	3	3	3	3	3	0	3	0	3	0	3	0	3	0	3	0	3	0	3	0	3	0	3	0	3	0	3	0
				Physician
				Clinical Officer	1		1		1		1	1	1	1	1	1	1		1		1		1		1		1		1		1		1		1		1		1
				Nurse
				Pharmacist	1		1		1		1	1	1	1	1	1	1		1		1		1		1		1		1		1		1		1		1		1
				Triage Staff/Technician	1		1		1		1	1	1	1	1	1	1		1		1		1		1		1		1		1		1		1		1		1
Cq2	57	Worsen (Cq1) - improve (Cq2)	0.025	ALL	3	0	3	0	3	0	3	0	3	0	3	0	3	3	3	3	3	3	3	0	3	0	3	0	3	0	3	0	3	0	3	0	3	0	3	0
				Physician
				Clinical Officer	1		1		1		1		1		1		1	1	1	1	1	1	1		1		1		1		1		1		1		1		1
				Nurse
				Pharmacist	1		1		1		1		1		1		1	1	1	1	1	1	1		1		1		1		1		1		1		1		1
				Triage Staff/Technician	1		1		1		1		1		1		1	1	1	1	1	1	1		1		1		1		1		1		1		1		1
Cq2	58	Worsen (Cq1) - improve (Cq2)	0.025	ALL	3	0	3	0	3	0	3	0	3	0	3	0	3	0	3	0	3	0	3	3	3	3	3	3	3	0	3	0	3	0	3	0	3	0	3	0
				Physician
				Clinical Officer	1		1		1		1		1		1		1		1		1		1	1	1	1	1	1	1		1		1		1		1		1
				Nurse
				Pharmacist	1		1		1		1		1		1		1		1		1		1	1	1	1	1	1	1		1		1		1		1		1
				Triage Staff/Technician	1		1		1		1		1		1		1		1		1		1	1	1	1	1	1	1		1		1		1		1		1
Cq2	59	Worsen (Cq1) - improve (Cq2)	0.025	ALL	3	0	3	0	3	0	3	0	3	0	3	0	3	0	3	0	3	0	3	0	3	0	3	0	3	3	3	3	3	3	3	0	3	0	3	0
				Physician
				Clinical Officer	1		1		1		1		1		1		1		1		1		1		1		1		1	1	1	1	1	1	1		1		1
				Nurse
				Pharmacist	1		1		1		1		1		1		1		1		1		1		1		1		1	1	1	1	1	1	1		1		1
				Triage Staff/Technician	1		1		1		1		1		1		1		1		1		1		1		1		1	1	1	1	1	1	1		1		1
Cq1	60	No change (Cq1)	0.00625	ALL	3	3	3	3	3	3	3	3	3	3	3	3	3	3	3	3	3	3	3	3	3	3	3	3	3	3	3	3	3	3	3	3	3	3	3	3
				Physician
				Clinical Officer	1	1	1	1	1	1	1	1	1	1	1	1	1	1	1	1	1	1	1	1	1	1	1	1	1	1	1	1	1	1	1	1	1	1	1	1
				Nurse
				Pharmacist	1	1	1	1	1	1	1	1	1	1	1	1	1	1	1	1	1	1	1	1	1	1	1	1	1	1	1	1	1	1	1	1	1	1	1	1
				Triage Staff/Technician	1	1	1	1	1	1	1	1	1	1	1	1	1	1	1	1	1	1	1	1	1	1	1	1	1	1	1	1	1	1	1	1	1	1	1	1
Cq1	61	Improve (Cq2)	0.00625	ALL	3	3	3	3	3	3	3	0	3	0	3	0	3	0	3	0	3	0	3	0	3	0	3	0	3	0	3	0	3	0	3	0	3	0	3	0
				Physician
				Clinical Officer	1	1	1	1	1	1	1		1		1		1		1		1		1		1		1		1		1		1		1		1		1
				Nurse
				Pharmacist	1	1	1	1	1	1	1		1		1		1		1		1		1		1		1		1		1		1		1		1		1
				Triage Staff/Technician	1	1	1	1	1	1	1		1		1		1		1		1		1		1		1		1		1		1		1		1		1
Cq1	62	Improve (Cq2)	0.00625	ALL	3	3	3	3	3	3	3	3	3	3	3	3	3	0	3	0	3	0	3	0	3	0	3	0	3	0	3	0	3	0	3	0	3	0	3	0
				Physician
				Clinical Officer	1	1	1	1	1	1	1	1	1	1	1	1	1		1		1		1		1		1		1		1		1		1		1		1
				Nurse
				Pharmacist	1	1	1	1	1	1	1	1	1	1	1	1	1		1		1		1		1		1		1		1		1		1		1		1
				Triage Staff/Technician	1	1	1	1	1	1	1	1	1	1	1	1	1		1		1		1		1		1		1		1		1		1		1		1
Cq1	63	Improve (Cq2)	0.00625	ALL	3	3	3	3	3	3	3	3	3	3	3	3	3	3	3	3	3	3	3	0	3	0	3	0	3	0	3	0	3	0	3	0	3	0	3	0
				Physician
				Clinical Officer	1	1	1	1	1	1	1	1	1	1	1	1	1	1	1	1	1	1	1		1		1		1		1		1		1		1		1
				Nurse
				Pharmacist	1	1	1	1	1	1	1	1	1	1	1	1	1	1	1	1	1	1	1		1		1		1		1		1		1		1		1
				Triage Staff/Technician	1	1	1	1	1	1	1	1	1	1	1	1	1	1	1	1	1	1	1		1		1		1		1		1		1		1		1
Cq1	64	Improve (Cq2)	0.00625	ALL	3	3	3	3	3	3	3	3	3	3	3	3	3	3	3	3	3	3	3	3	3	3	3	3	3	0	3	0	3	0	3	0	3	0	3	0
				Physician
				Clinical Officer	1	1	1	1	1	1	1	1	1	1	1	1	1	1	1	1	1	1	1	1	1	1	1	1	1		1		1		1		1		1
				Nurse
				Pharmacist	1	1	1	1	1	1	1	1	1	1	1	1	1	1	1	1	1	1	1	1	1	1	1	1	1		1		1		1		1		1
				Triage Staff/Technician	1	1	1	1	1	1	1	1	1	1	1	1	1	1	1	1	1	1	1	1	1	1	1	1	1		1		1		1		1		1
Cq1	65	Improve (Cq2)	0.00625	ALL	3	3	3	3	3	3	3	3	3	3	3	3	3	3	3	3	3	3	3	3	3	3	3	3	3	3	3	3	3	3	3	0	3	0	3	0
				Physician
				Clinical Officer	1	1	1	1	1	1	1	1	1	1	1	1	1	1	1	1	1	1	1	1	1	1	1	1	1	1	1	1	1	1	1		1		1
				Nurse
				Pharmacist	1	1	1	1	1	1	1	1	1	1	1	1	1	1	1	1	1	1	1	1	1	1	1	1	1	1	1	1	1	1	1		1		1
				Triage Staff/Technician	1	1	1	1	1	1	1	1	1	1	1	1	1	1	1	1	1	1	1	1	1	1	1	1	1	1	1	1	1	1	1		1		1
Cq1	66	Improve (Nq2)	0.00625	ALL	3	3	3	3	3	3	3	0	3	0	3	0	3	0	3	0	3	0	3	0	3	0	3	0	3	0	3	0	3	0	3	0	3	0	3	0
				Physician
				Clinical Officer	1	1	1	1	1	1
				Nurse							1		1		1		1		1		1		1		1		1		1		1		1		1		1		1
				Pharmacist	1	1	1	1	1	1	1		1		1		1		1		1		1		1		1		1		1		1		1		1		1
				Triage Staff/Technician	1	1	1	1	1	1	1		1		1		1		1		1		1		1		1		1		1		1		1		1		1
Cq1	67	Improve (Nq2)	0.00625	ALL	3	3	3	3	3	3	3	3	3	3	3	3	3	0	3	0	3	0	3	0	3	0	3	0	3	0	3	0	3	0	3	0	3	0	3	0
				Physician
				Clinical Officer	1	1	1	1	1	1	1	1	1	1	1	1
				Nurse													1		1		1		1		1		1		1		1		1		1		1		1
				Pharmacist	1	1	1	1	1	1	1	1	1	1	1	1	1		1		1		1		1		1		1		1		1		1		1		1
				Triage Staff/Technician	1	1	1	1	1	1	1	1	1	1	1	1	1		1		1		1		1		1		1		1		1		1		1		1
Cq1	68	Improve (Nq2)	0.00625	ALL	3	3	3	3	3	3	3	3	3	3	3	3	3	3	3	3	3	3	3	0	3	0	3	0	3	0	3	0	3	0	3	0	3	0	3	0
				Physician
				Clinical Officer	1	1	1	1	1	1	1	1	1	1	1	1	1	1	1	1	1	1
				Nurse																			1		1		1		1		1		1		1		1		1
				Pharmacist	1	1	1	1	1	1	1	1	1	1	1	1	1	1	1	1	1	1	1		1		1		1		1		1		1		1		1
				Triage Staff/Technician	1	1	1	1	1	1	1	1	1	1	1	1	1	1	1	1	1	1	1		1		1		1		1		1		1		1		1
Cq1	69	Improve (Nq2)	0.00625	ALL	3	3	3	3	3	3	3	3	3	3	3	3	3	3	3	3	3	3	3	3	3	3	3	3	3	0	3	0	3	0	3	0	3	0	3	0
				Physician
				Clinical Officer	1	1	1	1	1	1	1	1	1	1	1	1	1	1	1	1	1	1	1	1	1	1	1	1
				Nurse																									1		1		1		1		1		1
				Pharmacist	1	1	1	1	1	1	1	1	1	1	1	1	1	1	1	1	1	1	1	1	1	1	1	1	1		1		1		1		1		1
				Triage Staff/Technician	1	1	1	1	1	1	1	1	1	1	1	1	1	1	1	1	1	1	1	1	1	1	1	1	1		1		1		1		1		1
Cq1	70	Improve (Nq2)	0.00625	ALL	3	3	3	3	3	3	3	3	3	3	3	3	3	3	3	3	3	3	3	3	3	3	3	3	3	3	3	3	3	3	3	0	3	0	3	0
				Physician
				Clinical Officer	1	1	1	1	1	1	1	1	1	1	1	1	1	1	1	1	1	1	1	1	1	1	1	1	1	1	1	1	1	1
				Nurse																															1		1		1
				Pharmacist	1	1	1	1	1	1	1	1	1	1	1	1	1	1	1	1	1	1	1	1	1	1	1	1	1	1	1	1	1	1	1		1		1
				Triage Staff/Technician	1	1	1	1	1	1	1	1	1	1	1	1	1	1	1	1	1	1	1	1	1	1	1	1	1	1	1	1	1	1	1		1		1
Cq1	71	Worsen (Pq1) - improve (Cq1)	0.00625	ALL	3	3	3	3	3	3	3	3	3	3	3	3	3	3	3	3	3	3	3	3	3	3	3	3	3	3	3	3	3	3	3	3	3	3	3	3
				Physician							1	1	1	1	1	1
				Clinical Officer	1	1	1	1	1	1							1	1	1	1	1	1	1	1	1	1	1	1	1	1	1	1	1	1	1	1	1	1	1	1
				Nurse
				Pharmacist	1	1	1	1	1	1	1	1	1	1	1	1	1	1	1	1	1	1	1	1	1	1	1	1	1	1	1	1	1	1	1	1	1	1	1	1
				Triage Staff/Technician	1	1	1	1	1	1	1	1	1	1	1	1	1	1	1	1	1	1	1	1	1	1	1	1	1	1	1	1	1	1	1	1	1	1	1	1
Cq1	72	Worsen (Pq1) - improve (Cq1)	0.00625	ALL	3	3	3	3	3	3	3	3	3	3	3	3	3	3	3	3	3	3	3	3	3	3	3	3	3	3	3	3	3	3	3	3	3	3	3	3
				Physician													1	1	1	1	1	1
				Clinical Officer	1	1	1	1	1	1	1	1	1	1	1	1							1	1	1	1	1	1	1	1	1	1	1	1	1	1	1	1	1	1
				Nurse
				Pharmacist	1	1	1	1	1	1	1	1	1	1	1	1	1	1	1	1	1	1	1	1	1	1	1	1	1	1	1	1	1	1	1	1	1	1	1	1
				Triage Staff/Technician	1	1	1	1	1	1	1	1	1	1	1	1	1	1	1	1	1	1	1	1	1	1	1	1	1	1	1	1	1	1	1	1	1	1	1	1
Cq1	73	Worsen (Pq1) - improve (Cq1)	0.00625	ALL	1	1	1	1	1	1	1	1	1	1	1	1	1	1	1	1	1	1	2	2	2	2	2	2	1	1	1	1	1	1	1	1	1	1	1	1
				Physician																			1	1	1	1	1	1
				Clinical Officer	1	1	1	1	1	1	1	1	1	1	1	1	1	1	1	1	1	1							1	1	1	1	1	1	1	1	1	1	1	1
				Nurse
				Pharmacist	1	1	1	1	1	1	1	1	1	1	1	1	1	1	1	1	1	1	1	1	1	1	1	1	1	1	1	1	1	1	1	1	1	1	1	1
				Triage Staff/Technician	1	1	1	1	1	1	1	1	1	1	1	1	1	1	1	1	1	1	1	1	1	1	1	1	1	1	1	1	1	1	1	1	1	1	1	1
Cq1	74	Worsen (Pq1) - improve (Cq1)	0.00625	ALL	3	3	3	3	3	3	3	3	3	3	3	3	3	3	3	3	3	3	3	3	3	3	3	3	3	3	3	3	3	3	3	3	3	3	3	3
				Physician																									1	1	1	1	1	1
				Clinical Officer	1	1	1	1	1	1	1	1	1	1	1	1	1	1	1	1	1	1	1	1	1	1	1	1							1	1	1	1	1	1
				Nurse
				Pharmacist	1	1	1	1	1	1	1	1	1	1	1	1	1	1	1	1	1	1	1	1	1	1	1	1	1	1	1	1	1	1	1	1	1	1	1	1
				Triage Staff/Technician	1	1	1	1	1	1	1	1	1	1	1	1	1	1	1	1	1	1	1	1	1	1	1	1	1	1	1	1	1	1	1	1	1	1	1	1
Cq1	75	Worsen (Pq1) - improve (Cq1)	0.00625	ALL	3	3	3	3	3	3	3	3	3	3	3	3	3	3	3	3	3	3	3	3	3	3	3	3	3	3	3	3	3	3	3	3	3	3	3	3
				Physician																															1	1	1	1	1	1
				Clinical Officer	1	1	1	1	1	1	1	1	1	1	1	1	1	1	1	1	1	1	1	1	1	1	1	1	1	1	1	1	1	1
				Nurse
				Pharmacist	1	1	1	1	1	1	1	1	1	1	1	1	1	1	1	1	1	1	1	1	1	1	1	1	1	1	1	1	1	1	1	1	1	1	1	1
				Triage Staff/Technician	1	1	1	1	1	1	1	1	1	1	1	1	1	1	1	1	1	1	1	1	1	1	1	1	1	1	1	1	1	1	1	1	1	1	1	1
Pq1	76	No change (Pq1)	0.0166667	ALL	3	3	3	3	3	3	3	3	3	3	3	3	3	3	3	3	3	3	3	3	3	3	3	3	3	3	3	3	3	3	3	3	3	3	3	3
				Physician	1	1	1	1	1	1	1	1	1	1	1	1	1	1	1	1	1	1	1	1	1	1	1	1	1	1	1	1	1	1	1	1	1	1	1	1
				Clinical Officer
				Nurse
				Pharmacist	1	1	1	1	1	1	1	1	1	1	1	1	1	1	1	1	1	1	1	1	1	1	1	1	1	1	1	1	1	1	1	1	1	1	1	1
				Triage Staff/Technician	1	1	1	1	1	1	1	1	1	1	1	1	1	1	1	1	1	1	1	1	1	1	1	1	1	1	1	1	1	1	1	1	1	1	1	1
Pq1	77	Improve (Cq1)	0.0166667	ALL	3	3	3	3	3	3	3	3	3	3	3	3	3	3	3	3	3	3	3	3	3	3	3	3	3	3	3	3	3	3	3	3	3	3	3	3
				Physician	1	1	1	1	1	1
				Clinical Officer							1	1	1	1	1	1	1	1	1	1	1	1	1	1	1	1	1	1	1	1	1	1	1	1	1	1	1	1	1	1
				Nurse
				Pharmacist	1	1	1	1	1	1	1	1	1	1	1	1	1	1	1	1	1	1	1	1	1	1	1	1	1	1	1	1	1	1	1	1	1	1	1	1
				Triage Staff/Technician	1	1	1	1	1	1	1	1	1	1	1	1	1	1	1	1	1	1	1	1	1	1	1	1	1	1	1	1	1	1	1	1	1	1	1	1
Pq1	78	Improve (Cq1)	0.0166667	ALL	3	3	3	3	3	3	3	3	3	3	3	3	3	3	3	3	3	3	3	3	3	3	3	3	3	3	3	3	3	3	3	3	3	3	3	3
				Physician	1	1	1	1	1	1	1	1	1	1	1	1
				Clinical Officer													1	1	1	1	1	1	1	1	1	1	1	1	1	1	1	1	1	1	1	1	1	1	1	1
				Nurse
				Pharmacist	1	1	1	1	1	1	1	1	1	1	1	1	1	1	1	1	1	1	1	1	1	1	1	1	1	1	1	1	1	1	1	1	1	1	1	1
				Triage Staff/Technician	1	1	1	1	1	1	1	1	1	1	1	1	1	1	1	1	1	1	1	1	1	1	1	1	1	1	1	1	1	1	1	1	1	1	1	1
Pq1	79	Improve (Cq1)	0.0166667	ALL	3	3	3	3	3	3	3	3	3	3	3	3	3	3	3	3	3	3	3	3	3	3	3	3	3	3	3	3	3	3	3	3	3	3	3	3
				Physician	1	1	1	1	1	1	1	1	1	1	1	1	1	1	1	1	1	1
				Clinical Officer																			1	1	1	1	1	1	1	1	1	1	1	1	1	1	1	1	1	1
				Nurse
				Pharmacist	1	1	1	1	1	1	1	1	1	1	1	1	1	1	1	1	1	1	1	1	1	1	1	1	1	1	1	1	1	1	1	1	1	1	1	1
				Triage Staff/Technician	1	1	1	1	1	1	1	1	1	1	1	1	1	1	1	1	1	1	1	1	1	1	1	1	1	1	1	1	1	1	1	1	1	1	1	1
Pq1	80	Improve (Cq1)	0.0166667	ALL	3	3	3	3	3	3	3	3	3	3	3	3	3	3	3	3	3	3	3	3	3	3	3	3	3	3	3	3	3	3	3	3	3	3	3	3
				Physician	1	1	1	1	1	1	1	1	1	1	1	1	1	1	1	1	1	1	1	1	1	1	1	1
				Clinical Officer																									1	1	1	1	1	1	1	1	1	1	1	1
				Nurse
				Pharmacist	1	1	1	1	1	1	1	1	1	1	1	1	1	1	1	1	1	1	1	1	1	1	1	1	1	1	1	1	1	1	1	1	1	1	1	1
				Triage Staff/Technician	1	1	1	1	1	1	1	1	1	1	1	1	1	1	1	1	1	1	1	1	1	1	1	1	1	1	1	1	1	1	1	1	1	1	1	1
Pq1	81	Improve (Cq1)	0.0166667	ALL	3	3	3	3	3	3	3	3	3	3	3	3	3	3	3	3	3	3	3	3	3	3	3	3	3	3	3	3	3	3	3	3	3	3	3	3
				Physician	1	1	1	1	1	1	1	1	1	1	1	1	1	1	1	1	1	1	1	1	1	1	1	1	1	1	1	1	1	1
				Clinical Officer																															1	1	1	1	1	1
				Nurse
				Pharmacist	1	1	1	1	1	1	1	1	1	1	1	1	1	1	1	1	1	1	1	1	1	1	1	1	1	1	1	1	1	1	1	1	1	1	1	1
				Triage Staff/Technician	1	1	1	1	1	1	1	1	1	1	1	1	1	1	1	1	1	1	1	1	1	1	1	1	1	1	1	1	1	1	1	1	1	1	1	1
		Percentage of patents	1
Worksheet B: Composite number of visits per patient type
Starting Category	#	Possible Outcomes		Enrollment month	1	2	3	4	5	6	7	8	9	10	11	12	13	14	15	16	17	18	19	20	21	22	23	24	25	26	27	28	29	30	31	32	33	34	35	36
Nq6	1	No change (Nq6)	0.416667	ALL	0.833333	0	0	0	0	0	0.833333	0	0	0	0	0	0.833333	0	0	0	0	0	0.833333	0	0	0	0	0	0.833333	0	0	0	0	0	0.833333	0	0	0	0	0
				Physician	0	0	0	0	0	0	0	0	0	0	0	0	0	0	0	0	0	0	0	0	0	0	0	0	0	0	0	0	0	0	0	0	0	0	0	0
				Clinical Officer	0	0	0	0	0	0	0	0	0	0	0	0	0	0	0	0	0	0	0	0	0	0	0	0	0	0	0	0	0	0	0	0	0	0	0	0
				Nurse	0.416667	0	0	0	0	0	0.416667	0	0	0	0	0	0.416667	0	0	0	0	0	0.416667	0	0	0	0	0	0.416667	0	0	0	0	0	0.416667	0	0	0	0	0
				Pharmacist	0	0	0	0	0	0	0	0	0	0	0	0	0	0	0	0	0	0	0	0	0	0	0	0	0	0	0	0	0	0	0	0	0	0	0	0
				Triage Staff/Technician	0.416667	0	0	0	0	0	0.416667	0	0	0	0	0	0.416667	0	0	0	0	0	0.416667	0	0	0	0	0	0.416667	0	0	0	0	0	0.416667	0	0	0	0	0
Nq6	2	Worsen (Nq1) - improve (Nq6)	0.416667	ALL	0.833333	0	0	0	0	0	1.25	1.25	1.25	1.25	1.25	1.25	0.833333	0	0	0	0	0	0.833333	0	0	0	0	0	0.833333	0	0	0	0	0	0.833333	0	0	0	0	0
				Physician	0	0	0	0	0	0	0	0	0	0	0	0	0	0	0	0	0	0	0	0	0	0	0	0	0	0	0	0	0	0	0	0	0	0	0	0
				Clinical Officer	0	0	0	0	0	0	0	0	0	0	0	0	0	0	0	0	0	0	0	0	0	0	0	0	0	0	0	0	0	0	0	0	0	0	0	0
				Nurse	0.416667	0	0	0	0	0	0.416667	0.416667	0.416667	0.416667	0.416667	0.416667	0.416667	0	0	0	0	0	0.416667	0	0	0	0	0	0.416667	0	0	0	0	0	0.416667	0	0	0	0	0
				Pharmacist	0	0	0	0	0	0	0.416667	0.416667	0.416667	0.416667	0.416667	0.416667	0	0	0	0	0	0	0	0	0	0	0	0	0	0	0	0	0	0	0	0	0	0	0	0
				Triage Staff/Technician	0.416667	0	0	0	0	0	0.416667	0.416667	0.416667	0.416667	0.416667	0.416667	0.416667	0	0	0	0	0	0.416667	0	0	0	0	0	0.416667	0	0	0	0	0	0.416667	0	0	0	0	0
Nq6	3	Worsen (Nq1) - improve (Nq6)	0.416667	ALL	0.833333	0	0	0	0	0	0.833333	0	0	0	0	0	1.25	1.25	1.25	1.25	1.25	1.25	0.833333	0	0	0	0	0	0.833333	0	0	0	0	0	0.833333	0	0	0	0	0
				Physician	0	0	0	0	0	0	0	0	0	0	0	0	0	0	0	0	0	0	0	0	0	0	0	0	0	0	0	0	0	0	0	0	0	0	0	0
				Clinical Officer	0	0	0	0	0	0	0	0	0	0	0	0	0	0	0	0	0	0	0	0	0	0	0	0	0	0	0	0	0	0	0	0	0	0	0	0
				Nurse	0.416667	0	0	0	0	0	0.416667	0	0	0	0	0	0.416667	0.416667	0.416667	0.416667	0.416667	0.416667	0.416667	0	0	0	0	0	0.416667	0	0	0	0	0	0.416667	0	0	0	0	0
				Pharmacist	0	0	0	0	0	0	0	0	0	0	0	0	0.416667	0.416667	0.416667	0.416667	0.416667	0.416667	0	0	0	0	0	0	0	0	0	0	0	0	0	0	0	0	0	0
				Triage Staff/Technician	0.416667	0	0	0	0	0	0.416667	0	0	0	0	0	0.416667	0.416667	0.416667	0.416667	0.416667	0.416667	0.416667	0	0	0	0	0	0.416667	0	0	0	0	0	0.416667	0	0	0	0	0
Nq6	4	Worsen (Nq1) - improve (Nq6)	0.416667	ALL	0.833333	0	0	0	0	0	0.833333	0	0	0	0	0	0.833333	0	0	0	0	0	1.25	1.25	1.25	1.25	1.25	1.25	0.833333	0	0	0	0	0	0.833333	0	0	0	0	0
				Physician	0	0	0	0	0	0	0	0	0	0	0	0	0	0	0	0	0	0	0	0	0	0	0	0	0	0	0	0	0	0	0	0	0	0	0	0
				Clinical Officer	0	0	0	0	0	0	0	0	0	0	0	0	0	0	0	0	0	0	0	0	0	0	0	0	0	0	0	0	0	0	0	0	0	0	0	0
				Nurse	0.416667	0	0	0	0	0	0.416667	0	0	0	0	0	0.416667	0	0	0	0	0	0.416667	0.416667	0.416667	0.416667	0.416667	0.416667	0.416667	0	0	0	0	0	0.416667	0	0	0	0	0
				Pharmacist	0	0	0	0	0	0	0	0	0	0	0	0	0	0	0	0	0	0	0.416667	0.416667	0.416667	0.416667	0.416667	0.416667	0	0	0	0	0	0	0	0	0	0	0	0
				Triage Staff/Technician	0.416667	0	0	0	0	0	0.416667	0	0	0	0	0	0.416667	0	0	0	0	0	0.416667	0.416667	0.416667	0.416667	0.416667	0.416667	0.416667	0	0	0	0	0	0.416667	0	0	0	0	0
Nq6	5	Worsen (Nq1) - improve (Nq6)	0.416667	ALL	0.833333	0	0	0	0	0	0.833333	0	0	0	0	0	0.833333	0	0	0	0	0	0.833333	0	0	0	0	0	1.25	1.25	1.25	1.25	1.25	1.25	0.833333	0	0	0	0	0
				Physician	0	0	0	0	0	0	0	0	0	0	0	0	0	0	0	0	0	0	0	0	0	0	0	0	0	0	0	0	0	0	0	0	0	0	0	0
				Clinical Officer	0	0	0	0	0	0	0	0	0	0	0	0	0	0	0	0	0	0	0	0	0	0	0	0	0	0	0	0	0	0	0	0	0	0	0	0
				Nurse	0.416667	0	0	0	0	0	0.416667	0	0	0	0	0	0.416667	0	0	0	0	0	0.416667	0	0	0	0	0	0.416667	0.416667	0.416667	0.416667	0.416667	0.416667	0.416667	0	0	0	0	0
				Pharmacist	0	0	0	0	0	0	0	0	0	0	0	0	0	0	0	0	0	0	0	0	0	0	0	0	0.416667	0.416667	0.416667	0.416667	0.416667	0.416667	0	0	0	0	0	0
				Triage Staff/Technician	0.416667	0	0	0	0	0	0.416667	0	0	0	0	0	0.416667	0	0	0	0	0	0.416667	0	0	0	0	0	0.416667	0.416667	0.416667	0.416667	0.416667	0.416667	0.416667	0	0	0	0	0
Nq6	6	Worsen (Nq1) - improve (Nq6)	0.416667	ALL	0.833333	0	0	0	0	0	0.833333	0	0	0	0	0	0.833333	0	0	0	0	0	0.833333	0	0	0	0	0	0.833333	0	0	0	0	0	1.25	1.25	1.25	1.25	1.25	1.25
				Physician	0	0	0	0	0	0	0	0	0	0	0	0	0	0	0	0	0	0	0	0	0	0	0	0	0	0	0	0	0	0	0	0	0	0	0	0
				Clinical Officer	0	0	0	0	0	0	0	0	0	0	0	0	0	0	0	0	0	0	0	0	0	0	0	0	0	0	0	0	0	0	0	0	0	0	0	0
				Nurse	0.416667	0	0	0	0	0	0.416667	0	0	0	0	0	0.416667	0	0	0	0	0	0.416667	0	0	0	0	0	0.416667	0	0	0	0	0	0.416667	0.416667	0.416667	0.416667	0.416667	0.416667
				Pharmacist	0	0	0	0	0	0	0	0	0	0	0	0	0	0	0	0	0	0	0	0	0	0	0	0	0	0	0	0	0	0	0.416667	0.416667	0.416667	0.416667	0.416667	0.416667
				Triage Staff/Technician	0.416667	0	0	0	0	0	0.416667	0	0	0	0	0	0.416667	0	0	0	0	0	0.416667	0	0	0	0	0	0.416667	0	0	0	0	0	0.416667	0.416667	0.416667	0.416667	0.416667	0.416667
Nq6	7	Worsen (Nq1) - improve (Nq2)	0.416667	ALL	0.833333	0	0	0	0	0	1.25	1.25	1.25	1.25	1.25	1.25	1.25	0	1.25	0	1.25	0	1.25	0	1.25	0	1.25	0	1.25	0	1.25	0	1.25	0	1.25	0	1.25	0	1.25	0
				Physician	0	0	0	0	0	0	0	0	0	0	0	0	0	0	0	0	0	0	0	0	0	0	0	0	0	0	0	0	0	0	0	0	0	0	0	0
				Clinical Officer	0	0	0	0	0	0	0	0	0	0	0	0	0	0	0	0	0	0	0	0	0	0	0	0	0	0	0	0	0	0	0	0	0	0	0	0
				Nurse	0.416667	0	0	0	0	0	0.416667	0.416667	0.416667	0.416667	0.416667	0.416667	0.416667	0	0.416667	0	0.416667	0	0.416667	0	0.416667	0	0.416667	0	0.416667	0	0.416667	0	0.416667	0	0.416667	0	0.416667	0	0.416667	0
				Pharmacist	0	0	0	0	0	0	0.416667	0.416667	0.416667	0.416667	0.416667	0.416667	0.416667	0	0.416667	0	0.416667	0	0.416667	0	0.416667	0	0.416667	0	0.416667	0	0.416667	0	0.416667	0	0.416667	0	0.416667	0	0.416667	0
				Triage Staff/Technician	0.416667	0	0	0	0	0	0.416667	0.416667	0.416667	0.416667	0.416667	0.416667	0.416667	0	0.416667	0	0.416667	0	0.416667	0	0.416667	0	0.416667	0	0.416667	0	0.416667	0	0.416667	0	0.416667	0	0.416667	0	0.416667	0
Nq6	8	Worsen (Nq1) - improve (Nq2)	0.416667	ALL	0.833333	0	0	0	0	0	0.833333	0	0	0	0	0	1.25	1.25	1.25	1.25	1.25	1.25	1.25	0	1.25	0	1.25	0	1.25	0	1.25	0	1.25	0	1.25	0	1.25	0	1.25	0
				Physician	0	0	0	0	0	0	0	0	0	0	0	0	0	0	0	0	0	0	0	0	0	0	0	0	0	0	0	0	0	0	0	0	0	0	0	0
				Clinical Officer	0	0	0	0	0	0	0	0	0	0	0	0	0	0	0	0	0	0	0	0	0	0	0	0	0	0	0	0	0	0	0	0	0	0	0	0
				Nurse	0.416667	0	0	0	0	0	0.416667	0	0	0	0	0	0.416667	0.416667	0.416667	0.416667	0.416667	0.416667	0.416667	0	0.416667	0	0.416667	0	0.416667	0	0.416667	0	0.416667	0	0.416667	0	0.416667	0	0.416667	0
				Pharmacist	0	0	0	0	0	0	0	0	0	0	0	0	0.416667	0.416667	0.416667	0.416667	0.416667	0.416667	0.416667	0	0.416667	0	0.416667	0	0.416667	0	0.416667	0	0.416667	0	0.416667	0	0.416667	0	0.416667	0
				Triage Staff/Technician	0.416667	0	0	0	0	0	0.416667	0	0	0	0	0	0.416667	0.416667	0.416667	0.416667	0.416667	0.416667	0.416667	0	0.416667	0	0.416667	0	0.416667	0	0.416667	0	0.416667	0	0.416667	0	0.416667	0	0.416667	0
Nq6	9	Worsen (Nq1) - improve (Nq2)	0.416667	ALL	0.833333	0	0	0	0	0	0.833333	0	0	0	0	0	0.833333	0	0	0	0	0	1.25	1.25	1.25	1.25	1.25	1.25	1.25	0	1.25	0	1.25	0	1.25	0	1.25	0	1.25	0
				Physician	0	0	0	0	0	0	0	0	0	0	0	0	0	0	0	0	0	0	0	0	0	0	0	0	0	0	0	0	0	0	0	0	0	0	0	0
				Clinical Officer	0	0	0	0	0	0	0	0	0	0	0	0	0	0	0	0	0	0	0	0	0	0	0	0	0	0	0	0	0	0	0	0	0	0	0	0
				Nurse	0.416667	0	0	0	0	0	0.416667	0	0	0	0	0	0.416667	0	0	0	0	0	0.416667	0.416667	0.416667	0.416667	0.416667	0.416667	0.416667	0	0.416667	0	0.416667	0	0.416667	0	0.416667	0	0.416667	0
				Pharmacist	0	0	0	0	0	0	0	0	0	0	0	0	0	0	0	0	0	0	0.416667	0.416667	0.416667	0.416667	0.416667	0.416667	0.416667	0	0.416667	0	0.416667	0	0.416667	0	0.416667	0	0.416667	0
				Triage Staff/Technician	0.416667	0	0	0	0	0	0.416667	0	0	0	0	0	0.416667	0	0	0	0	0	0.416667	0.416667	0.416667	0.416667	0.416667	0.416667	0.416667	0	0.416667	0	0.416667	0	0.416667	0	0.416667	0	0.416667	0
Nq6	10	Worsen (Nq1) - improve (Nq2)	0.416667	ALL	0.833333	0	0	0	0	0	0.833333	0	0	0	0	0	0.833333	0	0	0	0	0	0.833333	0	0	0	0	0	1.25	1.25	1.25	1.25	1.25	1.25	1.25	0	1.25	0	1.25	0
				Physician	0	0	0	0	0	0	0	0	0	0	0	0	0	0	0	0	0	0	0	0	0	0	0	0	0	0	0	0	0	0	0	0	0	0	0	0
				Clinical Officer	0	0	0	0	0	0	0	0	0	0	0	0	0	0	0	0	0	0	0	0	0	0	0	0	0	0	0	0	0	0	0	0	0	0	0	0
				Nurse	0.416667	0	0	0	0	0	0.416667	0	0	0	0	0	0.416667	0	0	0	0	0	0.416667	0	0	0	0	0	0.416667	0.416667	0.416667	0.416667	0.416667	0.416667	0.416667	0	0.416667	0	0.416667	0
				Pharmacist	0	0	0	0	0	0	0	0	0	0	0	0	0	0	0	0	0	0	0	0	0	0	0	0	0.416667	0.416667	0.416667	0.416667	0.416667	0.416667	0.416667	0	0.416667	0	0.416667	0
				Triage Staff/Technician	0.416667	0	0	0	0	0	0.416667	0	0	0	0	0	0.416667	0	0	0	0	0	0.416667	0	0	0	0	0	0.416667	0.416667	0.416667	0.416667	0.416667	0.416667	0.416667	0	0.416667	0	0.416667	0
Nq2	11	No change (Nq2)	0.877193	ALL	2.63158	0	2.63158	0	2.63158	0	2.63158	0	2.63158	0	2.63158	0	2.63158	0	2.63158	0	2.63158	0	2.63158	0	2.63158	0	2.63158	0	2.63158	0	2.63158	0	2.63158	0	2.63158	0	2.63158	0	2.63158	0
				Physician	0	0	0	0	0	0	0	0	0	0	0	0	0	0	0	0	0	0	0	0	0	0	0	0	0	0	0	0	0	0	0	0	0	0	0	0
				Clinical Officer	0	0	0	0	0	0	0	0	0	0	0	0	0	0	0	0	0	0	0	0	0	0	0	0	0	0	0	0	0	0	0	0	0	0	0	0
				Nurse	0.877193	0	0.877193	0	0.877193	0	0.877193	0	0.877193	0	0.877193	0	0.877193	0	0.877193	0	0.877193	0	0.877193	0	0.877193	0	0.877193	0	0.877193	0	0.877193	0	0.877193	0	0.877193	0	0.877193	0	0.877193	0
				Pharmacist	0.877193	0	0.877193	0	0.877193	0	0.877193	0	0.877193	0	0.877193	0	0.877193	0	0.877193	0	0.877193	0	0.877193	0	0.877193	0	0.877193	0	0.877193	0	0.877193	0	0.877193	0	0.877193	0	0.877193	0	0.877193	0
				Triage Staff/Technician	0.877193	0	0.877193	0	0.877193	0	0.877193	0	0.877193	0	0.877193	0	0.877193	0	0.877193	0	0.877193	0	0.877193	0	0.877193	0	0.877193	0	0.877193	0	0.877193	0	0.877193	0	0.877193	0	0.877193	0	0.877193	0
Nq2	12	Worsen (Nq1) - improve (Nq6)	0.877193	ALL	2.63158	0	2.63158	0	2.63158	0	2.63158	2.63158	2.63158	2.63158	2.63158	2.63158	1.75439	0	0	0	0	0	1.75439	0	0	0	0	0	1.75439	0	0	0	0	0	1.75439	0	0	0	0	0
				Physician	0	0	0	0	0	0	0	0	0	0	0	0	0	0	0	0	0	0	0	0	0	0	0	0	0	0	0	0	0	0	0	0	0	0	0	0
				Clinical Officer	0	0	0	0	0	0	0	0	0	0	0	0	0	0	0	0	0	0	0	0	0	0	0	0	0	0	0	0	0	0	0	0	0	0	0	0
				Nurse	0.877193	0	0.877193	0	0.877193	0	0.877193	0.877193	0.877193	0.877193	0.877193	0.877193	0.877193	0	0	0	0	0	0.877193	0	0	0	0	0	0.877193	0	0	0	0	0	0.877193	0	0	0	0	0
				Pharmacist	0.877193	0	0.877193	0	0.877193	0	0.877193	0.877193	0.877193	0.877193	0.877193	0.877193	0	0	0	0	0	0	0	0	0	0	0	0	0	0	0	0	0	0	0	0	0	0	0	0
				Triage Staff/Technician	0.877193	0	0.877193	0	0.877193	0	0.877193	0.877193	0.877193	0.877193	0.877193	0.877193	0.877193	0	0	0	0	0	0.877193	0	0	0	0	0	0.877193	0	0	0	0	0	0.877193	0	0	0	0	0
Nq2	13	Worsen (Nq1) - improve (Nq6)	0.877193	ALL	2.63158	0	2.63158	0	2.63158	0	2.63158	0	2.63158	0	2.63158	0	2.63158	2.63158	2.63158	2.63158	2.63158	2.63158	1.75439	0	0	0	0	0	1.75439	0	0	0	0	0	1.75439	0	0	0	0	0
				Physician	0	0	0	0	0	0	0	0	0	0	0	0	0	0	0	0	0	0	0	0	0	0	0	0	0	0	0	0	0	0	0	0	0	0	0	0
				Clinical Officer	0	0	0	0	0	0	0	0	0	0	0	0	0	0	0	0	0	0	0	0	0	0	0	0	0	0	0	0	0	0	0	0	0	0	0	0
				Nurse	0.877193	0	0.877193	0	0.877193	0	0.877193	0	0.877193	0	0.877193	0	0.877193	0.877193	0.877193	0.877193	0.877193	0.877193	0.877193	0	0	0	0	0	0.877193	0	0	0	0	0	0.877193	0	0	0	0	0
				Pharmacist	0.877193	0	0.877193	0	0.877193	0	0.877193	0	0.877193	0	0.877193	0	0.877193	0.877193	0.877193	0.877193	0.877193	0.877193	0	0	0	0	0	0	0	0	0	0	0	0	0	0	0	0	0	0
				Triage Staff/Technician	0.877193	0	0.877193	0	0.877193	0	0.877193	0	0.877193	0	0.877193	0	0.877193	0.877193	0.877193	0.877193	0.877193	0.877193	0.877193	0	0	0	0	0	0.877193	0	0	0	0	0	0.877193	0	0	0	0	0
Nq2	14	Worsen (Nq1) - improve (Nq6)	0.877193	ALL	2.63158	0	2.63158	0	2.63158	0	2.63158	0	2.63158	0	2.63158	0	2.63158	0	2.63158	0	2.63158	0	2.63158	2.63158	2.63158	2.63158	2.63158	2.63158	1.75439	0	0	0	0	0	1.75439	0	0	0	0	0
				Physician	0	0	0	0	0	0	0	0	0	0	0	0	0	0	0	0	0	0	0	0	0	0	0	0	0	0	0	0	0	0	0	0	0	0	0	0
				Clinical Officer	0	0	0	0	0	0	0	0	0	0	0	0	0	0	0	0	0	0	0	0	0	0	0	0	0	0	0	0	0	0	0	0	0	0	0	0
				Nurse	0.877193	0	0.877193	0	0.877193	0	0.877193	0	0.877193	0	0.877193	0	0.877193	0	0.877193	0	0.877193	0	0.877193	0.877193	0.877193	0.877193	0.877193	0.877193	0.877193	0	0	0	0	0	0.877193	0	0	0	0	0
				Pharmacist	0.877193	0	0.877193	0	0.877193	0	0.877193	0	0.877193	0	0.877193	0	0.877193	0	0.877193	0	0.877193	0	0.877193	0.877193	0.877193	0.877193	0.877193	0.877193	0	0	0	0	0	0	0	0	0	0	0	0
				Triage Staff/Technician	0.877193	0	0.877193	0	0.877193	0	0.877193	0	0.877193	0	0.877193	0	0.877193	0	0.877193	0	0.877193	0	0.877193	0.877193	0.877193	0.877193	0.877193	0.877193	0.877193	0	0	0	0	0	0.877193	0	0	0	0	0
Nq2	15	Worsen (Nq1) - improve (Nq6)	0.877193	ALL	2.63158	0	2.63158	0	2.63158	0	2.63158	0	2.63158	0	2.63158	0	2.63158	0	2.63158	0	2.63158	0	2.63158	0	2.63158	0	2.63158	0	2.63158	2.63158	2.63158	2.63158	2.63158	2.63158	1.75439	0	0	0	0	0
				Physician	0	0	0	0	0	0	0	0	0	0	0	0	0	0	0	0	0	0	0	0	0	0	0	0	0	0	0	0	0	0	0	0	0	0	0	0
				Clinical Officer	0	0	0	0	0	0	0	0	0	0	0	0	0	0	0	0	0	0	0	0	0	0	0	0	0	0	0	0	0	0	0	0	0	0	0	0
				Nurse	0.877193	0	0.877193	0	0.877193	0	0.877193	0	0.877193	0	0.877193	0	0.877193	0	0.877193	0	0.877193	0	0.877193	0	0.877193	0	0.877193	0	0.877193	0.877193	0.877193	0.877193	0.877193	0.877193	0.877193	0	0	0	0	0
				Pharmacist	0.877193	0	0.877193	0	0.877193	0	0.877193	0	0.877193	0	0.877193	0	0.877193	0	0.877193	0	0.877193	0	0.877193	0	0.877193	0	0.877193	0	0.877193	0.877193	0.877193	0.877193	0.877193	0.877193	0	0	0	0	0	0
				Triage Staff/Technician	0.877193	0	0.877193	0	0.877193	0	0.877193	0	0.877193	0	0.877193	0	0.877193	0	0.877193	0	0.877193	0	0.877193	0	0.877193	0	0.877193	0	0.877193	0.877193	0.877193	0.877193	0.877193	0.877193	0.877193	0	0	0	0	0
Nq2	16	Worsen (Nq1) - improve (Nq6)	0.877193	ALL	2.63158	0	2.63158	0	2.63158	0	2.63158	0	2.63158	0	2.63158	0	2.63158	0	2.63158	0	2.63158	0	2.63158	0	2.63158	0	2.63158	0	2.63158	0	2.63158	0	2.63158	0	2.63158	2.63158	2.63158	2.63158	2.63158	2.63158
				Physician	0	0	0	0	0	0	0	0	0	0	0	0	0	0	0	0	0	0	0	0	0	0	0	0	0	0	0	0	0	0	0	0	0	0	0	0
				Clinical Officer	0	0	0	0	0	0	0	0	0	0	0	0	0	0	0	0	0	0	0	0	0	0	0	0	0	0	0	0	0	0	0	0	0	0	0	0
				Nurse	0.877193	0	0.877193	0	0.877193	0	0.877193	0	0.877193	0	0.877193	0	0.877193	0	0.877193	0	0.877193	0	0.877193	0	0.877193	0	0.877193	0	0.877193	0	0.877193	0	0.877193	0	0.877193	0.877193	0.877193	0.877193	0.877193	0.877193
				Pharmacist	0.877193	0	0.877193	0	0.877193	0	0.877193	0	0.877193	0	0.877193	0	0.877193	0	0.877193	0	0.877193	0	0.877193	0	0.877193	0	0.877193	0	0.877193	0	0.877193	0	0.877193	0	0.877193	0.877193	0.877193	0.877193	0.877193	0.877193
				Triage Staff/Technician	0.877193	0	0.877193	0	0.877193	0	0.877193	0	0.877193	0	0.877193	0	0.877193	0	0.877193	0	0.877193	0	0.877193	0	0.877193	0	0.877193	0	0.877193	0	0.877193	0	0.877193	0	0.877193	0.877193	0.877193	0.877193	0.877193	0.877193
Nq2	17	Worsen (Nq1) - improve (Nq2)	0.877193	ALL	2.63158	0	2.63158	0	2.63158	0	2.63158	2.63158	2.63158	2.63158	2.63158	2.63158	2.63158	0	2.63158	0	2.63158	0	2.63158	0	2.63158	0	2.63158	0	2.63158	0	2.63158	0	2.63158	0	2.63158	0	2.63158	0	2.63158	0
				Physician	0	0	0	0	0	0	0	0	0	0	0	0	0	0	0	0	0	0	0	0	0	0	0	0	0	0	0	0	0	0	0	0	0	0	0	0
				Clinical Officer	0	0	0	0	0	0	0	0	0	0	0	0	0	0	0	0	0	0	0	0	0	0	0	0	0	0	0	0	0	0	0	0	0	0	0	0
				Nurse	0.877193	0	0.877193	0	0.877193	0	0.877193	0.877193	0.877193	0.877193	0.877193	0.877193	0.877193	0	0.877193	0	0.877193	0	0.877193	0	0.877193	0	0.877193	0	0.877193	0	0.877193	0	0.877193	0	0.877193	0	0.877193	0	0.877193	0
				Pharmacist	0.877193	0	0.877193	0	0.877193	0	0.877193	0.877193	0.877193	0.877193	0.877193	0.877193	0.877193	0	0.877193	0	0.877193	0	0.877193	0	0.877193	0	0.877193	0	0.877193	0	0.877193	0	0.877193	0	0.877193	0	0.877193	0	0.877193	0
				Triage Staff/Technician	0.877193	0	0.877193	0	0.877193	0	0.877193	0.877193	0.877193	0.877193	0.877193	0.877193	0.877193	0	0.877193	0	0.877193	0	0.877193	0	0.877193	0	0.877193	0	0.877193	0	0.877193	0	0.877193	0	0.877193	0	0.877193	0	0.877193	0
Nq2	18	Worsen (Nq1) - improve (Nq2)	0.877193	ALL	2.63158	0	2.63158	0	2.63158	0	2.63158	0	2.63158	0	2.63158	0	2.63158	2.63158	2.63158	2.63158	2.63158	2.63158	2.63158	0	2.63158	0	2.63158	0	2.63158	0	2.63158	0	2.63158	0	2.63158	0	2.63158	0	2.63158	0
				Physician	0	0	0	0	0	0	0	0	0	0	0	0	0	0	0	0	0	0	0	0	0	0	0	0	0	0	0	0	0	0	0	0	0	0	0	0
				Clinical Officer	0	0	0	0	0	0	0	0	0	0	0	0	0	0	0	0	0	0	0	0	0	0	0	0	0	0	0	0	0	0	0	0	0	0	0	0
				Nurse	0.877193	0	0.877193	0	0.877193	0	0.877193	0	0.877193	0	0.877193	0	0.877193	0.877193	0.877193	0.877193	0.877193	0.877193	0.877193	0	0.877193	0	0.877193	0	0.877193	0	0.877193	0	0.877193	0	0.877193	0	0.877193	0	0.877193	0
				Pharmacist	0.877193	0	0.877193	0	0.877193	0	0.877193	0	0.877193	0	0.877193	0	0.877193	0.877193	0.877193	0.877193	0.877193	0.877193	0.877193	0	0.877193	0	0.877193	0	0.877193	0	0.877193	0	0.877193	0	0.877193	0	0.877193	0	0.877193	0
				Triage Staff/Technician	0.877193	0	0.877193	0	0.877193	0	0.877193	0	0.877193	0	0.877193	0	0.877193	0.877193	0.877193	0.877193	0.877193	0.877193	0.877193	0	0.877193	0	0.877193	0	0.877193	0	0.877193	0	0.877193	0	0.877193	0	0.877193	0	0.877193	0
Nq2	19	Worsen (Nq1) - improve (Nq2)	0.877193	ALL	2.63158	0	2.63158	0	2.63158	0	2.63158	0	2.63158	0	2.63158	0	2.63158	0	2.63158	0	2.63158	0	2.63158	2.63158	2.63158	2.63158	2.63158	2.63158	2.63158	0	2.63158	0	2.63158	0	2.63158	0	2.63158	0	2.63158	0
				Physician	0	0	0	0	0	0	0	0	0	0	0	0	0	0	0	0	0	0	0	0	0	0	0	0	0	0	0	0	0	0	0	0	0	0	0	0
				Clinical Officer	0	0	0	0	0	0	0	0	0	0	0	0	0	0	0	0	0	0	0	0	0	0	0	0	0	0	0	0	0	0	0	0	0	0	0	0
				Nurse	0.877193	0	0.877193	0	0.877193	0	0.877193	0	0.877193	0	0.877193	0	0.877193	0	0.877193	0	0.877193	0	0.877193	0.877193	0.877193	0.877193	0.877193	0.877193	0.877193	0	0.877193	0	0.877193	0	0.877193	0	0.877193	0	0.877193	0
				Pharmacist	0.877193	0	0.877193	0	0.877193	0	0.877193	0	0.877193	0	0.877193	0	0.877193	0	0.877193	0	0.877193	0	0.877193	0.877193	0.877193	0.877193	0.877193	0.877193	0.877193	0	0.877193	0	0.877193	0	0.877193	0	0.877193	0	0.877193	0
				Triage Staff/Technician	0.877193	0	0.877193	0	0.877193	0	0.877193	0	0.877193	0	0.877193	0	0.877193	0	0.877193	0	0.877193	0	0.877193	0.877193	0.877193	0.877193	0.877193	0.877193	0.877193	0	0.877193	0	0.877193	0	0.877193	0	0.877193	0	0.877193	0
Nq2	20	Worsen (Nq1) - improve (Nq2)	0.877193	ALL	2.63158	0	2.63158	0	2.63158	0	2.63158	0	2.63158	0	2.63158	0	2.63158	0	2.63158	0	2.63158	0	2.63158	0	2.63158	0	2.63158	0	2.63158	2.63158	2.63158	2.63158	2.63158	2.63158	2.63158	0	2.63158	0	2.63158	0
				Physician	0	0	0	0	0	0	0	0	0	0	0	0	0	0	0	0	0	0	0	0	0	0	0	0	0	0	0	0	0	0	0	0	0	0	0	0
				Clinical Officer	0	0	0	0	0	0	0	0	0	0	0	0	0	0	0	0	0	0	0	0	0	0	0	0	0	0	0	0	0	0	0	0	0	0	0	0
				Nurse	0.877193	0	0.877193	0	0.877193	0	0.877193	0	0.877193	0	0.877193	0	0.877193	0	0.877193	0	0.877193	0	0.877193	0	0.877193	0	0.877193	0	0.877193	0.877193	0.877193	0.877193	0.877193	0.877193	0.877193	0	0.877193	0	0.877193	0
				Pharmacist	0.877193	0	0.877193	0	0.877193	0	0.877193	0	0.877193	0	0.877193	0	0.877193	0	0.877193	0	0.877193	0	0.877193	0	0.877193	0	0.877193	0	0.877193	0.877193	0.877193	0.877193	0.877193	0.877193	0.877193	0	0.877193	0	0.877193	0
				Triage Staff/Technician	0.877193	0	0.877193	0	0.877193	0	0.877193	0	0.877193	0	0.877193	0	0.877193	0	0.877193	0	0.877193	0	0.877193	0	0.877193	0	0.877193	0	0.877193	0.877193	0.877193	0.877193	0.877193	0.877193	0.877193	0	0.877193	0	0.877193	0
Nq2	21	Worsen (Cq1) - improve (Nq2)	0.877193	ALL	2.63158	0	2.63158	0	2.63158	0	2.63158	2.63158	2.63158	2.63158	2.63158	2.63158	2.63158	0	2.63158	0	2.63158	0	2.63158	0	2.63158	0	2.63158	0	2.63158	0	2.63158	0	2.63158	0	2.63158	0	2.63158	0	2.63158	0
				Physician	0	0	0	0	0	0	0	0	0	0	0	0	0	0	0	0	0	0	0	0	0	0	0	0	0	0	0	0	0	0	0	0	0	0	0	0
				Clinical Officer	0	0	0	0	0	0	0.877193	0.877193	0.877193	0.877193	0.877193	0.877193	0	0	0	0	0	0	0	0	0	0	0	0	0	0	0	0	0	0	0	0	0	0	0	0
				Nurse	0.877193	0	0.877193	0	0.877193	0	0	0	0	0	0	0	0.877193	0	0.877193	0	0.877193	0	0.877193	0	0.877193	0	0.877193	0	0.877193	0	0.877193	0	0.877193	0	0.877193	0	0.877193	0	0.877193	0
				Pharmacist	0.877193	0	0.877193	0	0.877193	0	0.877193	0.877193	0.877193	0.877193	0.877193	0.877193	0.877193	0	0.877193	0	0.877193	0	0.877193	0	0.877193	0	0.877193	0	0.877193	0	0.877193	0	0.877193	0	0.877193	0	0.877193	0	0.877193	0
				Triage Staff/Technician	0.877193	0	0.877193	0	0.877193	0	0.877193	0.877193	0.877193	0.877193	0.877193	0.877193	0.877193	0	0.877193	0	0.877193	0	0.877193	0	0.877193	0	0.877193	0	0.877193	0	0.877193	0	0.877193	0	0.877193	0	0.877193	0	0.877193	0
Nq2	22	Worsen (Cq1) - improve (Nq2)	0.877193	ALL	2.63158	0	2.63158	0	2.63158	0	2.63158	0	2.63158	0	2.63158	0	2.63158	2.63158	2.63158	2.63158	2.63158	2.63158	2.63158	0	2.63158	0	2.63158	0	2.63158	0	2.63158	0	2.63158	0	2.63158	0	2.63158	0	2.63158	0
				Physician	0	0	0	0	0	0	0	0	0	0	0	0	0	0	0	0	0	0	0	0	0	0	0	0	0	0	0	0	0	0	0	0	0	0	0	0
				Clinical Officer	0	0	0	0	0	0	0	0	0	0	0	0	0.877193	0.877193	0.877193	0.877193	0.877193	0.877193	0	0	0	0	0	0	0	0	0	0	0	0	0	0	0	0	0	0
				Nurse	0.877193	0	0.877193	0	0.877193	0	0.877193	0	0.877193	0	0.877193	0	0	0	0	0	0	0	0.877193	0	0.877193	0	0.877193	0	0.877193	0	0.877193	0	0.877193	0	0.877193	0	0.877193	0	0.877193	0
				Pharmacist	0.877193	0	0.877193	0	0.877193	0	0.877193	0	0.877193	0	0.877193	0	0.877193	0.877193	0.877193	0.877193	0.877193	0.877193	0.877193	0	0.877193	0	0.877193	0	0.877193	0	0.877193	0	0.877193	0	0.877193	0	0.877193	0	0.877193	0
				Triage Staff/Technician	0.877193	0	0.877193	0	0.877193	0	0.877193	0	0.877193	0	0.877193	0	0.877193	0.877193	0.877193	0.877193	0.877193	0.877193	0.877193	0	0.877193	0	0.877193	0	0.877193	0	0.877193	0	0.877193	0	0.877193	0	0.877193	0	0.877193	0
Nq2	23	Worsen (Cq1) - improve (Nq2)	0.877193	ALL	2.63158	0	2.63158	0	2.63158	0	2.63158	0	2.63158	0	2.63158	0	2.63158	0	2.63158	0	2.63158	0	2.63158	2.63158	2.63158	2.63158	2.63158	2.63158	2.63158	0	2.63158	0	2.63158	0	2.63158	0	2.63158	0	2.63158	0
				Physician	0	0	0	0	0	0	0	0	0	0	0	0	0	0	0	0	0	0	0	0	0	0	0	0	0	0	0	0	0	0	0	0	0	0	0	0
				Clinical Officer	0	0	0	0	0	0	0	0	0	0	0	0	0	0	0	0	0	0	0.877193	0.877193	0.877193	0.877193	0.877193	0.877193	0	0	0	0	0	0	0	0	0	0	0	0
				Nurse	0.877193	0	0.877193	0	0.877193	0	0.877193	0	0.877193	0	0.877193	0	0.877193	0	0.877193	0	0.877193	0	0	0	0	0	0	0	0.877193	0	0.877193	0	0.877193	0	0.877193	0	0.877193	0	0.877193	0
				Pharmacist	0.877193	0	0.877193	0	0.877193	0	0.877193	0	0.877193	0	0.877193	0	0.877193	0	0.877193	0	0.877193	0	0.877193	0.877193	0.877193	0.877193	0.877193	0.877193	0.877193	0	0.877193	0	0.877193	0	0.877193	0	0.877193	0	0.877193	0
				Triage Staff/Technician	0.877193	0	0.877193	0	0.877193	0	0.877193	0	0.877193	0	0.877193	0	0.877193	0	0.877193	0	0.877193	0	0.877193	0.877193	0.877193	0.877193	0.877193	0.877193	0.877193	0	0.877193	0	0.877193	0	0.877193	0	0.877193	0	0.877193	0
Nq2	24	Worsen (Cq1) - improve (Nq2)	0.877193	ALL	2.63158	0	2.63158	0	2.63158	0	2.63158	0	2.63158	0	2.63158	0	2.63158	0	2.63158	0	2.63158	0	2.63158	0	2.63158	0	2.63158	0	2.63158	2.63158	2.63158	2.63158	2.63158	2.63158	2.63158	0	2.63158	0	2.63158	0
				Physician	0	0	0	0	0	0	0	0	0	0	0	0	0	0	0	0	0	0	0	0	0	0	0	0	0	0	0	0	0	0	0	0	0	0	0	0
				Clinical Officer	0	0	0	0	0	0	0	0	0	0	0	0	0	0	0	0	0	0	0	0	0	0	0	0	0.877193	0.877193	0.877193	0.877193	0.877193	0.877193	0	0	0	0	0	0
				Nurse	0.877193	0	0.877193	0	0.877193	0	0.877193	0	0.877193	0	0.877193	0	0.877193	0	0.877193	0	0.877193	0	0.877193	0	0.877193	0	0.877193	0	0	0	0	0	0	0	0.877193	0	0.877193	0	0.877193	0
				Pharmacist	0.877193	0	0.877193	0	0.877193	0	0.877193	0	0.877193	0	0.877193	0	0.877193	0	0.877193	0	0.877193	0	0.877193	0	0.877193	0	0.877193	0	0.877193	0.877193	0.877193	0.877193	0.877193	0.877193	0.877193	0	0.877193	0	0.877193	0
				Triage Staff/Technician	0.877193	0	0.877193	0	0.877193	0	0.877193	0	0.877193	0	0.877193	0	0.877193	0	0.877193	0	0.877193	0	0.877193	0	0.877193	0	0.877193	0	0.877193	0.877193	0.877193	0.877193	0.877193	0.877193	0.877193	0	0.877193	0	0.877193	0
Nq2	25	Worsen (Cq1) - improve (Nq2)	0.877193	ALL	2.63158	0	2.63158	0	2.63158	0	2.63158	0	2.63158	0	2.63158	0	2.63158	0	2.63158	0	2.63158	0	2.63158	0	2.63158	0	2.63158	0	2.63158	0	2.63158	0	2.63158	0	2.63158	2.63158	2.63158	2.63158	2.63158	2.63158
				Physician	0	0	0	0	0	0	0	0	0	0	0	0	0	0	0	0	0	0	0	0	0	0	0	0	0	0	0	0	0	0	0	0	0	0	0	0
				Clinical Officer	0	0	0	0	0	0	0	0	0	0	0	0	0	0	0	0	0	0	0	0	0	0	0	0	0	0	0	0	0	0	0.877193	0.877193	0.877193	0.877193	0.877193	0.877193
				Nurse	0.877193	0	0.877193	0	0.877193	0	0.877193	0	0.877193	0	0.877193	0	0.877193	0	0.877193	0	0.877193	0	0.877193	0	0.877193	0	0.877193	0	0.877193	0	0.877193	0	0.877193	0	0	0	0	0	0	0
				Pharmacist	0.877193	0	0.877193	0	0.877193	0	0.877193	0	0.877193	0	0.877193	0	0.877193	0	0.877193	0	0.877193	0	0.877193	0	0.877193	0	0.877193	0	0.877193	0	0.877193	0	0.877193	0	0.877193	0.877193	0.877193	0.877193	0.877193	0.877193
				Triage Staff/Technician	0.877193	0	0.877193	0	0.877193	0	0.877193	0	0.877193	0	0.877193	0	0.877193	0	0.877193	0	0.877193	0	0.877193	0	0.877193	0	0.877193	0	0.877193	0	0.877193	0	0.877193	0	0.877193	0.877193	0.877193	0.877193	0.877193	0.877193
Nq2	26	Worsen (Cq1) - improve (Cq2)	0.877193	ALL	2.63158	0	2.63158	0	2.63158	0	2.63158	2.63158	2.63158	2.63158	2.63158	2.63158	2.63158	0	2.63158	0	2.63158	0	2.63158	0	2.63158	0	2.63158	0	2.63158	0	2.63158	0	2.63158	0	2.63158	0	2.63158	0	2.63158	0
				Physician	0	0	0	0	0	0	0	0	0	0	0	0	0	0	0	0	0	0	0	0	0	0	0	0	0	0	0	0	0	0	0	0	0	0	0	0
				Clinical Officer	0	0	0	0	0	0	0.877193	0.877193	0.877193	0.877193	0.877193	0.877193	0.877193	0	0.877193	0	0.877193	0	0.877193	0	0.877193	0	0.877193	0	0.877193	0	0.877193	0	0.877193	0	0.877193	0	0.877193	0	0.877193	0
				Nurse	0.877193	0	0.877193	0	0.877193	0	0	0	0	0	0	0	0	0	0	0	0	0	0	0	0	0	0	0	0	0	0	0	0	0	0	0	0	0	0	0
				Pharmacist	0.877193	0	0.877193	0	0.877193	0	0.877193	0.877193	0.877193	0.877193	0.877193	0.877193	0.877193	0	0.877193	0	0.877193	0	0.877193	0	0.877193	0	0.877193	0	0.877193	0	0.877193	0	0.877193	0	0.877193	0	0.877193	0	0.877193	0
				Triage Staff/Technician	0.877193	0	0.877193	0	0.877193	0	0.877193	0.877193	0.877193	0.877193	0.877193	0.877193	0.877193	0	0.877193	0	0.877193	0	0.877193	0	0.877193	0	0.877193	0	0.877193	0	0.877193	0	0.877193	0	0.877193	0	0.877193	0	0.877193	0
Nq2	27	Worsen (Cq1) - improve (Cq2)	0.877193	ALL	2.63158	0	2.63158	0	2.63158	0	2.63158	0	2.63158	0	2.63158	0	2.63158	2.63158	2.63158	2.63158	2.63158	2.63158	2.63158	0	2.63158	0	2.63158	0	2.63158	0	2.63158	0	2.63158	0	2.63158	0	2.63158	0	2.63158	0
				Physician	0	0	0	0	0	0	0	0	0	0	0	0	0	0	0	0	0	0	0	0	0	0	0	0	0	0	0	0	0	0	0	0	0	0	0	0
				Clinical Officer	0	0	0	0	0	0	0	0	0	0	0	0	0.877193	0.877193	0.877193	0.877193	0.877193	0.877193	0.877193	0	0.877193	0	0.877193	0	0.877193	0	0.877193	0	0.877193	0	0.877193	0	0.877193	0	0.877193	0
				Nurse	0.877193	0	0.877193	0	0.877193	0	0.877193	0	0.877193	0	0.877193	0	0	0	0	0	0	0	0	0	0	0	0	0	0	0	0	0	0	0	0	0	0	0	0	0
				Pharmacist	0.877193	0	0.877193	0	0.877193	0	0.877193	0	0.877193	0	0.877193	0	0.877193	0.877193	0.877193	0.877193	0.877193	0.877193	0.877193	0	0.877193	0	0.877193	0	0.877193	0	0.877193	0	0.877193	0	0.877193	0	0.877193	0	0.877193	0
				Triage Staff/Technician	0.877193	0	0.877193	0	0.877193	0	0.877193	0	0.877193	0	0.877193	0	0.877193	0.877193	0.877193	0.877193	0.877193	0.877193	0.877193	0	0.877193	0	0.877193	0	0.877193	0	0.877193	0	0.877193	0	0.877193	0	0.877193	0	0.877193	0
Nq2	28	Worsen (Cq1) - improve (Cq2)	0.877193	ALL	2.63158	0	2.63158	0	2.63158	0	2.63158	0	2.63158	0	2.63158	0	2.63158	0	2.63158	0	2.63158	0	2.63158	2.63158	2.63158	2.63158	2.63158	2.63158	2.63158	0	2.63158	0	2.63158	0	2.63158	0	2.63158	0	2.63158	0
				Physician	0	0	0	0	0	0	0	0	0	0	0	0	0	0	0	0	0	0	0	0	0	0	0	0	0	0	0	0	0	0	0	0	0	0	0	0
				Clinical Officer	0	0	0	0	0	0	0	0	0	0	0	0	0	0	0	0	0	0	0.877193	0.877193	0.877193	0.877193	0.877193	0.877193	0.877193	0	0.877193	0	0.877193	0	0.877193	0	0.877193	0	0.877193	0
				Nurse	0.877193	0	0.877193	0	0.877193	0	0.877193	0	0.877193	0	0.877193	0	0.877193	0	0.877193	0	0.877193	0	0	0	0	0	0	0	0	0	0	0	0	0	0	0	0	0	0	0
				Pharmacist	0.877193	0	0.877193	0	0.877193	0	0.877193	0	0.877193	0	0.877193	0	0.877193	0	0.877193	0	0.877193	0	0.877193	0.877193	0.877193	0.877193	0.877193	0.877193	0.877193	0	0.877193	0	0.877193	0	0.877193	0	0.877193	0	0.877193	0
				Triage Staff/Technician	0.877193	0	0.877193	0	0.877193	0	0.877193	0	0.877193	0	0.877193	0	0.877193	0	0.877193	0	0.877193	0	0.877193	0.877193	0.877193	0.877193	0.877193	0.877193	0.877193	0	0.877193	0	0.877193	0	0.877193	0	0.877193	0	0.877193	0
Nq2	29	Worsen (Cq1) - improve (Cq2)	0.877193	ALL	2.63158	0	2.63158	0	2.63158	0	2.63158	0	2.63158	0	2.63158	0	2.63158	0	2.63158	0	2.63158	0	2.63158	0	2.63158	0	2.63158	0	2.63158	2.63158	2.63158	2.63158	2.63158	2.63158	2.63158	0	2.63158	0	2.63158	0
				Physician	0	0	0	0	0	0	0	0	0	0	0	0	0	0	0	0	0	0	0	0	0	0	0	0	0	0	0	0	0	0	0	0	0	0	0	0
				Clinical Officer	0	0	0	0	0	0	0	0	0	0	0	0	0	0	0	0	0	0	0	0	0	0	0	0	0.877193	0.877193	0.877193	0.877193	0.877193	0.877193	0.877193	0	0.877193	0	0.877193	0
				Nurse	0.877193	0	0.877193	0	0.877193	0	0.877193	0	0.877193	0	0.877193	0	0.877193	0	0.877193	0	0.877193	0	0.877193	0	0.877193	0	0.877193	0	0	0	0	0	0	0	0	0	0	0	0	0
				Pharmacist	0.877193	0	0.877193	0	0.877193	0	0.877193	0	0.877193	0	0.877193	0	0.877193	0	0.877193	0	0.877193	0	0.877193	0	0.877193	0	0.877193	0	0.877193	0.877193	0.877193	0.877193	0.877193	0.877193	0.877193	0	0.877193	0	0.877193	0
				Triage Staff/Technician	0.877193	0	0.877193	0	0.877193	0	0.877193	0	0.877193	0	0.877193	0	0.877193	0	0.877193	0	0.877193	0	0.877193	0	0.877193	0	0.877193	0	0.877193	0.877193	0.877193	0.877193	0.877193	0.877193	0.877193	0	0.877193	0	0.877193	0
Nq1	30	No change (Nq1)	1.25	ALL	3.75	3.75	3.75	3.75	3.75	3.75	3.75	3.75	3.75	3.75	3.75	3.75	3.75	3.75	3.75	3.75	3.75	3.75	3.75	3.75	3.75	3.75	3.75	3.75	3.75	3.75	3.75	3.75	3.75	3.75	3.75	3.75	3.75	3.75	3.75	3.75
				Physician	0	0	0	0	0	0	0	0	0	0	0	0	0	0	0	0	0	0	0	0	0	0	0	0	0	0	0	0	0	0	0	0	0	0	0	0
				Clinical Officer	0	0	0	0	0	0	0	0	0	0	0	0	0	0	0	0	0	0	0	0	0	0	0	0	0	0	0	0	0	0	0	0	0	0	0	0
				Nurse	1.25	1.25	1.25	1.25	1.25	1.25	1.25	1.25	1.25	1.25	1.25	1.25	1.25	1.25	1.25	1.25	1.25	1.25	1.25	1.25	1.25	1.25	1.25	1.25	1.25	1.25	1.25	1.25	1.25	1.25	1.25	1.25	1.25	1.25	1.25	1.25
				Pharmacist	1.25	1.25	1.25	1.25	1.25	1.25	1.25	1.25	1.25	1.25	1.25	1.25	1.25	1.25	1.25	1.25	1.25	1.25	1.25	1.25	1.25	1.25	1.25	1.25	1.25	1.25	1.25	1.25	1.25	1.25	1.25	1.25	1.25	1.25	1.25	1.25
				Triage Staff/Technician	1.25	1.25	1.25	1.25	1.25	1.25	1.25	1.25	1.25	1.25	1.25	1.25	1.25	1.25	1.25	1.25	1.25	1.25	1.25	1.25	1.25	1.25	1.25	1.25	1.25	1.25	1.25	1.25	1.25	1.25	1.25	1.25	1.25	1.25	1.25	1.25
Nq1	31	Improve (Nq6)	1.25	ALL	3.75	3.75	3.75	3.75	3.75	3.75	2.5	0	0	0	0	0	2.5	0	0	0	0	0	2.5	0	0	0	0	0	2.5	0	0	0	0	0	2.5	0	0	0	0	0
				Physician	0	0	0	0	0	0	0	0	0	0	0	0	0	0	0	0	0	0	0	0	0	0	0	0	0	0	0	0	0	0	0	0	0	0	0	0
				Clinical Officer	0	0	0	0	0	0	0	0	0	0	0	0	0	0	0	0	0	0	0	0	0	0	0	0	0	0	0	0	0	0	0	0	0	0	0	0
				Nurse	1.25	1.25	1.25	1.25	1.25	1.25	1.25	0	0	0	0	0	1.25	0	0	0	0	0	1.25	0	0	0	0	0	1.25	0	0	0	0	0	1.25	0	0	0	0	0
				Pharmacist	1.25	1.25	1.25	1.25	1.25	1.25	0	0	0	0	0	0	0	0	0	0	0	0	0	0	0	0	0	0	0	0	0	0	0	0	0	0	0	0	0	0
				Triage Staff/Technician	1.25	1.25	1.25	1.25	1.25	1.25	1.25	0	0	0	0	0	1.25	0	0	0	0	0	1.25	0	0	0	0	0	1.25	0	0	0	0	0	1.25	0	0	0	0	0
Nq1	32	Improve (Nq6)	1.25	ALL	3.75	3.75	3.75	3.75	3.75	3.75	3.75	3.75	3.75	3.75	3.75	3.75	2.5	0	0	0	0	0	2.5	0	0	0	0	0	2.5	0	0	0	0	0	2.5	0	0	0	0	0
				Physician	0	0	0	0	0	0	0	0	0	0	0	0	0	0	0	0	0	0	0	0	0	0	0	0	0	0	0	0	0	0	0	0	0	0	0	0
				Clinical Officer	0	0	0	0	0	0	0	0	0	0	0	0	0	0	0	0	0	0	0	0	0	0	0	0	0	0	0	0	0	0	0	0	0	0	0	0
				Nurse	1.25	1.25	1.25	1.25	1.25	1.25	1.25	1.25	1.25	1.25	1.25	1.25	1.25	0	0	0	0	0	1.25	0	0	0	0	0	1.25	0	0	0	0	0	1.25	0	0	0	0	0
				Pharmacist	1.25	1.25	1.25	1.25	1.25	1.25	1.25	1.25	1.25	1.25	1.25	1.25	0	0	0	0	0	0	0	0	0	0	0	0	0	0	0	0	0	0	0	0	0	0	0	0
				Triage Staff/Technician	1.25	1.25	1.25	1.25	1.25	1.25	1.25	1.25	1.25	1.25	1.25	1.25	1.25	0	0	0	0	0	1.25	0	0	0	0	0	1.25	0	0	0	0	0	1.25	0	0	0	0	0
Nq1	33	Improve (Nq6)	1.25	ALL	3.75	3.75	3.75	3.75	3.75	3.75	3.75	3.75	3.75	3.75	3.75	3.75	3.75	3.75	3.75	3.75	3.75	3.75	2.5	0	0	0	0	0	2.5	0	0	0	0	0	2.5	0	0	0	0	0
				Physician	0	0	0	0	0	0	0	0	0	0	0	0	0	0	0	0	0	0	0	0	0	0	0	0	0	0	0	0	0	0	0	0	0	0	0	0
				Clinical Officer	0	0	0	0	0	0	0	0	0	0	0	0	0	0	0	0	0	0	0	0	0	0	0	0	0	0	0	0	0	0	0	0	0	0	0	0
				Nurse	1.25	1.25	1.25	1.25	1.25	1.25	1.25	1.25	1.25	1.25	1.25	1.25	1.25	1.25	1.25	1.25	1.25	1.25	1.25	0	0	0	0	0	1.25	0	0	0	0	0	1.25	0	0	0	0	0
				Pharmacist	1.25	1.25	1.25	1.25	1.25	1.25	1.25	1.25	1.25	1.25	1.25	1.25	1.25	1.25	1.25	1.25	1.25	1.25	0	0	0	0	0	0	0	0	0	0	0	0	0	0	0	0	0	0
				Triage Staff/Technician	1.25	1.25	1.25	1.25	1.25	1.25	1.25	1.25	1.25	1.25	1.25	1.25	1.25	1.25	1.25	1.25	1.25	1.25	1.25	0	0	0	0	0	1.25	0	0	0	0	0	1.25	0	0	0	0	0
Nq1	34	Improve (Nq6)	1.25	ALL	3.75	3.75	3.75	3.75	3.75	3.75	3.75	3.75	3.75	3.75	3.75	3.75	3.75	3.75	3.75	3.75	3.75	3.75	3.75	3.75	3.75	3.75	3.75	3.75	2.5	0	0	0	0	0	2.5	0	0	0	0	0
				Physician	0	0	0	0	0	0	0	0	0	0	0	0	0	0	0	0	0	0	0	0	0	0	0	0	0	0	0	0	0	0	0	0	0	0	0	0
				Clinical Officer	0	0	0	0	0	0	0	0	0	0	0	0	0	0	0	0	0	0	0	0	0	0	0	0	0	0	0	0	0	0	0	0	0	0	0	0
				Nurse	1.25	1.25	1.25	1.25	1.25	1.25	1.25	1.25	1.25	1.25	1.25	1.25	1.25	1.25	1.25	1.25	1.25	1.25	1.25	1.25	1.25	1.25	1.25	1.25	1.25	0	0	0	0	0	1.25	0	0	0	0	0
				Pharmacist	1.25	1.25	1.25	1.25	1.25	1.25	1.25	1.25	1.25	1.25	1.25	1.25	1.25	1.25	1.25	1.25	1.25	1.25	1.25	1.25	1.25	1.25	1.25	1.25	0	0	0	0	0	0	0	0	0	0	0	0
				Triage Staff/Technician	1.25	1.25	1.25	1.25	1.25	1.25	1.25	1.25	1.25	1.25	1.25	1.25	1.25	1.25	1.25	1.25	1.25	1.25	1.25	1.25	1.25	1.25	1.25	1.25	1.25	0	0	0	0	0	1.25	0	0	0	0	0
Nq1	35	Improve (Nq6)	1.25	ALL	3.75	3.75	3.75	3.75	3.75	3.75	3.75	3.75	3.75	3.75	3.75	3.75	3.75	3.75	3.75	3.75	3.75	3.75	3.75	3.75	3.75	3.75	3.75	3.75	3.75	3.75	3.75	3.75	3.75	3.75	2.5	0	0	0	0	0
				Physician	0	0	0	0	0	0	0	0	0	0	0	0	0	0	0	0	0	0	0	0	0	0	0	0	0	0	0	0	0	0	0	0	0	0	0	0
				Clinical Officer	0	0	0	0	0	0	0	0	0	0	0	0	0	0	0	0	0	0	0	0	0	0	0	0	0	0	0	0	0	0	0	0	0	0	0	0
				Nurse	1.25	1.25	1.25	1.25	1.25	1.25	1.25	1.25	1.25	1.25	1.25	1.25	1.25	1.25	1.25	1.25	1.25	1.25	1.25	1.25	1.25	1.25	1.25	1.25	1.25	1.25	1.25	1.25	1.25	1.25	1.25	0	0	0	0	0
				Pharmacist	1.25	1.25	1.25	1.25	1.25	1.25	1.25	1.25	1.25	1.25	1.25	1.25	1.25	1.25	1.25	1.25	1.25	1.25	1.25	1.25	1.25	1.25	1.25	1.25	1.25	1.25	1.25	1.25	1.25	1.25	0	0	0	0	0	0
				Triage Staff/Technician	1.25	1.25	1.25	1.25	1.25	1.25	1.25	1.25	1.25	1.25	1.25	1.25	1.25	1.25	1.25	1.25	1.25	1.25	1.25	1.25	1.25	1.25	1.25	1.25	1.25	1.25	1.25	1.25	1.25	1.25	1.25	0	0	0	0	0
Nq1	36	Improve (Nq2)	1.25	ALL	3.75	3.75	3.75	3.75	3.75	3.75	3.75	0	3.75	0	3.75	0	3.75	0	3.75	0	3.75	0	3.75	0	3.75	0	3.75	0	3.75	0	3.75	0	3.75	0	3.75	0	3.75	0	3.75	0
				Physician	0	0	0	0	0	0	0	0	0	0	0	0	0	0	0	0	0	0	0	0	0	0	0	0	0	0	0	0	0	0	0	0	0	0	0	0
				Clinical Officer	0	0	0	0	0	0	0	0	0	0	0	0	0	0	0	0	0	0	0	0	0	0	0	0	0	0	0	0	0	0	0	0	0	0	0	0
				Nurse	1.25	1.25	1.25	1.25	1.25	1.25	1.25	0	1.25	0	1.25	0	1.25	0	1.25	0	1.25	0	1.25	0	1.25	0	1.25	0	1.25	0	1.25	0	1.25	0	1.25	0	1.25	0	1.25	0
				Pharmacist	1.25	1.25	1.25	1.25	1.25	1.25	1.25	0	1.25	0	1.25	0	1.25	0	1.25	0	1.25	0	1.25	0	1.25	0	1.25	0	1.25	0	1.25	0	1.25	0	1.25	0	1.25	0	1.25	0
				Triage Staff/Technician	1.25	1.25	1.25	1.25	1.25	1.25	1.25	0	1.25	0	1.25	0	1.25	0	1.25	0	1.25	0	1.25	0	1.25	0	1.25	0	1.25	0	1.25	0	1.25	0	1.25	0	1.25	0	1.25	0
Nq1	37	Improve (Nq2)	1.25	ALL	3.75	3.75	3.75	3.75	3.75	3.75	3.75	3.75	3.75	3.75	3.75	3.75	3.75	0	3.75	0	3.75	0	3.75	0	3.75	0	3.75	0	3.75	0	3.75	0	3.75	0	3.75	0	3.75	0	3.75	0
				Physician	0	0	0	0	0	0	0	0	0	0	0	0	0	0	0	0	0	0	0	0	0	0	0	0	0	0	0	0	0	0	0	0	0	0	0	0
				Clinical Officer	0	0	0	0	0	0	0	0	0	0	0	0	0	0	0	0	0	0	0	0	0	0	0	0	0	0	0	0	0	0	0	0	0	0	0	0
				Nurse	1.25	1.25	1.25	1.25	1.25	1.25	1.25	1.25	1.25	1.25	1.25	1.25	1.25	0	1.25	0	1.25	0	1.25	0	1.25	0	1.25	0	1.25	0	1.25	0	1.25	0	1.25	0	1.25	0	1.25	0
				Pharmacist	1.25	1.25	1.25	1.25	1.25	1.25	1.25	1.25	1.25	1.25	1.25	1.25	1.25	0	1.25	0	1.25	0	1.25	0	1.25	0	1.25	0	1.25	0	1.25	0	1.25	0	1.25	0	1.25	0	1.25	0
				Triage Staff/Technician	1.25	1.25	1.25	1.25	1.25	1.25	1.25	1.25	1.25	1.25	1.25	1.25	1.25	0	1.25	0	1.25	0	1.25	0	1.25	0	1.25	0	1.25	0	1.25	0	1.25	0	1.25	0	1.25	0	1.25	0
Nq1	38	Improve (Nq2)	1.25	ALL	3.75	3.75	3.75	3.75	3.75	3.75	3.75	3.75	3.75	3.75	3.75	3.75	3.75	3.75	3.75	3.75	3.75	3.75	3.75	0	3.75	0	3.75	0	3.75	0	3.75	0	3.75	0	3.75	0	3.75	0	3.75	0
				Physician	0	0	0	0	0	0	0	0	0	0	0	0	0	0	0	0	0	0	0	0	0	0	0	0	0	0	0	0	0	0	0	0	0	0	0	0
				Clinical Officer	0	0	0	0	0	0	0	0	0	0	0	0	0	0	0	0	0	0	0	0	0	0	0	0	0	0	0	0	0	0	0	0	0	0	0	0
				Nurse	1.25	1.25	1.25	1.25	1.25	1.25	1.25	1.25	1.25	1.25	1.25	1.25	1.25	1.25	1.25	1.25	1.25	1.25	1.25	0	1.25	0	1.25	0	1.25	0	1.25	0	1.25	0	1.25	0	1.25	0	1.25	0
				Pharmacist	1.25	1.25	1.25	1.25	1.25	1.25	1.25	1.25	1.25	1.25	1.25	1.25	1.25	1.25	1.25	1.25	1.25	1.25	1.25	0	1.25	0	1.25	0	1.25	0	1.25	0	1.25	0	1.25	0	1.25	0	1.25	0
				Triage Staff/Technician	1.25	1.25	1.25	1.25	1.25	1.25	1.25	1.25	1.25	1.25	1.25	1.25	1.25	1.25	1.25	1.25	1.25	1.25	1.25	0	1.25	0	1.25	0	1.25	0	1.25	0	1.25	0	1.25	0	1.25	0	1.25	0
Nq1	39	Improve (Nq2)	1.25	ALL	3.75	3.75	3.75	3.75	3.75	3.75	3.75	3.75	3.75	3.75	3.75	3.75	3.75	3.75	3.75	3.75	3.75	3.75	3.75	3.75	3.75	3.75	3.75	3.75	3.75	0	3.75	0	3.75	0	3.75	0	3.75	0	3.75	0
				Physician	0	0	0	0	0	0	0	0	0	0	0	0	0	0	0	0	0	0	0	0	0	0	0	0	0	0	0	0	0	0	0	0	0	0	0	0
				Clinical Officer	0	0	0	0	0	0	0	0	0	0	0	0	0	0	0	0	0	0	0	0	0	0	0	0	0	0	0	0	0	0	0	0	0	0	0	0
				Nurse	1.25	1.25	1.25	1.25	1.25	1.25	1.25	1.25	1.25	1.25	1.25	1.25	1.25	1.25	1.25	1.25	1.25	1.25	1.25	1.25	1.25	1.25	1.25	1.25	1.25	0	1.25	0	1.25	0	1.25	0	1.25	0	1.25	0
				Pharmacist	1.25	1.25	1.25	1.25	1.25	1.25	1.25	1.25	1.25	1.25	1.25	1.25	1.25	1.25	1.25	1.25	1.25	1.25	1.25	1.25	1.25	1.25	1.25	1.25	1.25	0	1.25	0	1.25	0	1.25	0	1.25	0	1.25	0
				Triage Staff/Technician	1.25	1.25	1.25	1.25	1.25	1.25	1.25	1.25	1.25	1.25	1.25	1.25	1.25	1.25	1.25	1.25	1.25	1.25	1.25	1.25	1.25	1.25	1.25	1.25	1.25	0	1.25	0	1.25	0	1.25	0	1.25	0	1.25	0
Nq1	40	Improve (Nq2)	1.25	ALL	3.75	3.75	3.75	3.75	3.75	3.75	3.75	3.75	3.75	3.75	3.75	3.75	3.75	3.75	3.75	3.75	3.75	3.75	3.75	3.75	3.75	3.75	3.75	3.75	3.75	3.75	3.75	3.75	3.75	3.75	3.75	0	3.75	0	3.75	0
				Physician	0	0	0	0	0	0	0	0	0	0	0	0	0	0	0	0	0	0	0	0	0	0	0	0	0	0	0	0	0	0	0	0	0	0	0	0
				Clinical Officer	0	0	0	0	0	0	0	0	0	0	0	0	0	0	0	0	0	0	0	0	0	0	0	0	0	0	0	0	0	0	0	0	0	0	0	0
				Nurse	1.25	1.25	1.25	1.25	1.25	1.25	1.25	1.25	1.25	1.25	1.25	1.25	1.25	1.25	1.25	1.25	1.25	1.25	1.25	1.25	1.25	1.25	1.25	1.25	1.25	1.25	1.25	1.25	1.25	1.25	1.25	0	1.25	0	1.25	0
				Pharmacist	1.25	1.25	1.25	1.25	1.25	1.25	1.25	1.25	1.25	1.25	1.25	1.25	1.25	1.25	1.25	1.25	1.25	1.25	1.25	1.25	1.25	1.25	1.25	1.25	1.25	1.25	1.25	1.25	1.25	1.25	1.25	0	1.25	0	1.25	0
				Triage Staff/Technician	1.25	1.25	1.25	1.25	1.25	1.25	1.25	1.25	1.25	1.25	1.25	1.25	1.25	1.25	1.25	1.25	1.25	1.25	1.25	1.25	1.25	1.25	1.25	1.25	1.25	1.25	1.25	1.25	1.25	1.25	1.25	0	1.25	0	1.25	0
Nq1	41	Worsen (Cq1) - improve (Nq2)	1.25	ALL	3.75	3.75	3.75	3.75	3.75	3.75	3.75	3.75	3.75	3.75	3.75	3.75	3.75	0	3.75	0	3.75	0	3.75	0	3.75	0	3.75	0	3.75	0	3.75	0	3.75	0	3.75	0	3.75	0	3.75	0
				Physician	0	0	0	0	0	0	0	0	0	0	0	0	0	0	0	0	0	0	0	0	0	0	0	0	0	0	0	0	0	0	0	0	0	0	0	0
				Clinical Officer	0	0	0	0	0	0	1.25	1.25	1.25	1.25	1.25	1.25	0	0	0	0	0	0	0	0	0	0	0	0	0	0	0	0	0	0	0	0	0	0	0	0
				Nurse	1.25	1.25	1.25	1.25	1.25	1.25	0	0	0	0	0	0	1.25	0	1.25	0	1.25	0	1.25	0	1.25	0	1.25	0	1.25	0	1.25	0	1.25	0	1.25	0	1.25	0	1.25	0
				Pharmacist	1.25	1.25	1.25	1.25	1.25	1.25	1.25	1.25	1.25	1.25	1.25	1.25	1.25	0	1.25	0	1.25	0	1.25	0	1.25	0	1.25	0	1.25	0	1.25	0	1.25	0	1.25	0	1.25	0	1.25	0
				Triage Staff/Technician	1.25	1.25	1.25	1.25	1.25	1.25	1.25	1.25	1.25	1.25	1.25	1.25	1.25	0	1.25	0	1.25	0	1.25	0	1.25	0	1.25	0	1.25	0	1.25	0	1.25	0	1.25	0	1.25	0	1.25	0
Nq1	42	Worsen (Cq1) - improve (Nq2)	1.25	ALL	3.75	3.75	3.75	3.75	3.75	3.75	3.75	3.75	3.75	3.75	3.75	3.75	3.75	3.75	3.75	3.75	3.75	3.75	3.75	0	3.75	0	3.75	0	3.75	0	3.75	0	3.75	0	3.75	0	3.75	0	3.75	0
				Physician	0	0	0	0	0	0	0	0	0	0	0	0	0	0	0	0	0	0	0	0	0	0	0	0	0	0	0	0	0	0	0	0	0	0	0	0
				Clinical Officer	0	0	0	0	0	0	0	0	0	0	0	0	1.25	1.25	1.25	1.25	1.25	1.25	0	0	0	0	0	0	0	0	0	0	0	0	0	0	0	0	0	0
				Nurse	1.25	1.25	1.25	1.25	1.25	1.25	1.25	1.25	1.25	1.25	1.25	1.25	0	0	0	0	0	0	1.25	0	1.25	0	1.25	0	1.25	0	1.25	0	1.25	0	1.25	0	1.25	0	1.25	0
				Pharmacist	1.25	1.25	1.25	1.25	1.25	1.25	1.25	1.25	1.25	1.25	1.25	1.25	1.25	1.25	1.25	1.25	1.25	1.25	1.25	0	1.25	0	1.25	0	1.25	0	1.25	0	1.25	0	1.25	0	1.25	0	1.25	0
				Triage Staff/Technician	1.25	1.25	1.25	1.25	1.25	1.25	1.25	1.25	1.25	1.25	1.25	1.25	1.25	1.25	1.25	1.25	1.25	1.25	1.25	0	1.25	0	1.25	0	1.25	0	1.25	0	1.25	0	1.25	0	1.25	0	1.25	0
Nq1	43	Worsen (Cq1) - improve (Nq2)	1.25	ALL	3.75	3.75	3.75	3.75	3.75	3.75	3.75	3.75	3.75	3.75	3.75	3.75	3.75	3.75	3.75	3.75	3.75	3.75	3.75	3.75	3.75	3.75	3.75	3.75	3.75	0	3.75	0	3.75	0	3.75	0	3.75	0	3.75	0
				Physician	0	0	0	0	0	0	0	0	0	0	0	0	0	0	0	0	0	0	0	0	0	0	0	0	0	0	0	0	0	0	0	0	0	0	0	0
				Clinical Officer	0	0	0	0	0	0	0	0	0	0	0	0	0	0	0	0	0	0	1.25	1.25	1.25	1.25	1.25	1.25	0	0	0	0	0	0	0	0	0	0	0	0
				Nurse	1.25	1.25	1.25	1.25	1.25	1.25	1.25	1.25	1.25	1.25	1.25	1.25	1.25	1.25	1.25	1.25	1.25	1.25	0	0	0	0	0	0	1.25	0	1.25	0	1.25	0	1.25	0	1.25	0	1.25	0
				Pharmacist	1.25	1.25	1.25	1.25	1.25	1.25	1.25	1.25	1.25	1.25	1.25	1.25	1.25	1.25	1.25	1.25	1.25	1.25	1.25	1.25	1.25	1.25	1.25	1.25	1.25	0	1.25	0	1.25	0	1.25	0	1.25	0	1.25	0
				Triage Staff/Technician	1.25	1.25	1.25	1.25	1.25	1.25	1.25	1.25	1.25	1.25	1.25	1.25	1.25	1.25	1.25	1.25	1.25	1.25	1.25	1.25	1.25	1.25	1.25	1.25	1.25	0	1.25	0	1.25	0	1.25	0	1.25	0	1.25	0
Nq1	44	Worsen (Cq1) - improve (Nq2)	1.25	ALL	3.75	3.75	3.75	3.75	3.75	3.75	3.75	3.75	3.75	3.75	3.75	3.75	3.75	3.75	3.75	3.75	3.75	3.75	3.75	3.75	3.75	3.75	3.75	3.75	3.75	3.75	3.75	3.75	3.75	3.75	3.75	0	3.75	0	3.75	0
				Physician	0	0	0	0	0	0	0	0	0	0	0	0	0	0	0	0	0	0	0	0	0	0	0	0	0	0	0	0	0	0	0	0	0	0	0	0
				Clinical Officer	0	0	0	0	0	0	0	0	0	0	0	0	0	0	0	0	0	0	0	0	0	0	0	0	1.25	1.25	1.25	1.25	1.25	1.25	0	0	0	0	0	0
				Nurse	1.25	1.25	1.25	1.25	1.25	1.25	1.25	1.25	1.25	1.25	1.25	1.25	1.25	1.25	1.25	1.25	1.25	1.25	1.25	1.25	1.25	1.25	1.25	1.25	0	0	0	0	0	0	1.25	0	1.25	0	1.25	0
				Pharmacist	1.25	1.25	1.25	1.25	1.25	1.25	1.25	1.25	1.25	1.25	1.25	1.25	1.25	1.25	1.25	1.25	1.25	1.25	1.25	1.25	1.25	1.25	1.25	1.25	1.25	1.25	1.25	1.25	1.25	1.25	1.25	0	1.25	0	1.25	0
				Triage Staff/Technician	1.25	1.25	1.25	1.25	1.25	1.25	1.25	1.25	1.25	1.25	1.25	1.25	1.25	1.25	1.25	1.25	1.25	1.25	1.25	1.25	1.25	1.25	1.25	1.25	1.25	1.25	1.25	1.25	1.25	1.25	1.25	0	1.25	0	1.25	0
Nq1	45	Worsen (Cq1) - improve (Nq2)	1.25	ALL	3.75	3.75	3.75	3.75	3.75	3.75	3.75	3.75	3.75	3.75	3.75	3.75	3.75	3.75	3.75	3.75	3.75	3.75	3.75	3.75	3.75	3.75	3.75	3.75	3.75	3.75	3.75	3.75	3.75	3.75	3.75	3.75	3.75	3.75	3.75	3.75
				Physician	0	0	0	0	0	0	0	0	0	0	0	0	0	0	0	0	0	0	0	0	0	0	0	0	0	0	0	0	0	0	0	0	0	0	0	0
				Clinical Officer	0	0	0	0	0	0	0	0	0	0	0	0	0	0	0	0	0	0	0	0	0	0	0	0	0	0	0	0	0	0	1.25	1.25	1.25	1.25	1.25	1.25
				Nurse	1.25	1.25	1.25	1.25	1.25	1.25	1.25	1.25	1.25	1.25	1.25	1.25	1.25	1.25	1.25	1.25	1.25	1.25	1.25	1.25	1.25	1.25	1.25	1.25	1.25	1.25	1.25	1.25	1.25	1.25	0	0	0	0	0	0
				Pharmacist	1.25	1.25	1.25	1.25	1.25	1.25	1.25	1.25	1.25	1.25	1.25	1.25	1.25	1.25	1.25	1.25	1.25	1.25	1.25	1.25	1.25	1.25	1.25	1.25	1.25	1.25	1.25	1.25	1.25	1.25	1.25	1.25	1.25	1.25	1.25	1.25
				Triage Staff/Technician	1.25	1.25	1.25	1.25	1.25	1.25	1.25	1.25	1.25	1.25	1.25	1.25	1.25	1.25	1.25	1.25	1.25	1.25	1.25	1.25	1.25	1.25	1.25	1.25	1.25	1.25	1.25	1.25	1.25	1.25	1.25	1.25	1.25	1.25	1.25	1.25
Nq1	46	Worsen (Cq1) - improve (Cq2)	1.25	ALL	3.75	3.75	3.75	3.75	3.75	3.75	3.75	3.75	3.75	3.75	3.75	3.75	3.75	0	3.75	0	3.75	0	3.75	0	3.75	0	3.75	0	3.75	0	3.75	0	3.75	0	3.75	0	3.75	0	3.75	0
				Physician	0	0	0	0	0	0	0	0	0	0	0	0	0	0	0	0	0	0	0	0	0	0	0	0	0	0	0	0	0	0	0	0	0	0	0	0
				Clinical Officer	0	0	0	0	0	0	1.25	1.25	1.25	1.25	1.25	1.25	1.25	0	1.25	0	1.25	0	1.25	0	1.25	0	1.25	0	1.25	0	1.25	0	1.25	0	1.25	0	1.25	0	1.25	0
				Nurse	1.25	1.25	1.25	1.25	1.25	1.25	0	0	0	0	0	0	0	0	0	0	0	0	0	0	0	0	0	0	0	0	0	0	0	0	0	0	0	0	0	0
				Pharmacist	1.25	1.25	1.25	1.25	1.25	1.25	1.25	1.25	1.25	1.25	1.25	1.25	1.25	0	1.25	0	1.25	0	1.25	0	1.25	0	1.25	0	1.25	0	1.25	0	1.25	0	1.25	0	1.25	0	1.25	0
				Triage Staff/Technician	1.25	1.25	1.25	1.25	1.25	1.25	1.25	1.25	1.25	1.25	1.25	1.25	1.25	0	1.25	0	1.25	0	1.25	0	1.25	0	1.25	0	1.25	0	1.25	0	1.25	0	1.25	0	1.25	0	1.25	0
Nq1	47	Worsen (Cq1) - improve (Cq2)	1.25	ALL	3.75	3.75	3.75	3.75	3.75	3.75	3.75	3.75	3.75	3.75	3.75	3.75	3.75	3.75	3.75	3.75	3.75	3.75	3.75	0	3.75	0	3.75	0	3.75	0	3.75	0	3.75	0	3.75	0	3.75	0	3.75	0
				Physician	0	0	0	0	0	0	0	0	0	0	0	0	0	0	0	0	0	0	0	0	0	0	0	0	0	0	0	0	0	0	0	0	0	0	0	0
				Clinical Officer	0	0	0	0	0	0	0	0	0	0	0	0	1.25	1.25	1.25	1.25	1.25	1.25	1.25	0	1.25	0	1.25	0	1.25	0	1.25	0	1.25	0	1.25	0	1.25	0	1.25	0
				Nurse	1.25	1.25	1.25	1.25	1.25	1.25	1.25	1.25	1.25	1.25	1.25	1.25	0	0	0	0	0	0	0	0	0	0	0	0	0	0	0	0	0	0	0	0	0	0	0	0
				Pharmacist	1.25	1.25	1.25	1.25	1.25	1.25	1.25	1.25	1.25	1.25	1.25	1.25	1.25	1.25	1.25	1.25	1.25	1.25	1.25	0	1.25	0	1.25	0	1.25	0	1.25	0	1.25	0	1.25	0	1.25	0	1.25	0
				Triage Staff/Technician	1.25	1.25	1.25	1.25	1.25	1.25	1.25	1.25	1.25	1.25	1.25	1.25	1.25	1.25	1.25	1.25	1.25	1.25	1.25	0	1.25	0	1.25	0	1.25	0	1.25	0	1.25	0	1.25	0	1.25	0	1.25	0
Nq1	48	Worsen (Cq1) - improve (Cq2)	1.25	ALL	3.75	3.75	3.75	3.75	3.75	3.75	3.75	3.75	3.75	3.75	3.75	3.75	3.75	3.75	3.75	3.75	3.75	3.75	3.75	3.75	3.75	3.75	3.75	3.75	3.75	0	3.75	0	3.75	0	3.75	0	3.75	0	3.75	0
				Physician	0	0	0	0	0	0	0	0	0	0	0	0	0	0	0	0	0	0	0	0	0	0	0	0	0	0	0	0	0	0	0	0	0	0	0	0
				Clinical Officer	0	0	0	0	0	0	0	0	0	0	0	0	0	0	0	0	0	0	1.25	1.25	1.25	1.25	1.25	1.25	1.25	0	1.25	0	1.25	0	1.25	0	1.25	0	1.25	0
				Nurse	1.25	1.25	1.25	1.25	1.25	1.25	1.25	1.25	1.25	1.25	1.25	1.25	1.25	1.25	1.25	1.25	1.25	1.25	0	0	0	0	0	0	0	0	0	0	0	0	0	0	0	0	0	0
				Pharmacist	1.25	1.25	1.25	1.25	1.25	1.25	1.25	1.25	1.25	1.25	1.25	1.25	1.25	1.25	1.25	1.25	1.25	1.25	1.25	1.25	1.25	1.25	1.25	1.25	1.25	0	1.25	0	1.25	0	1.25	0	1.25	0	1.25	0
				Triage Staff/Technician	1.25	1.25	1.25	1.25	1.25	1.25	1.25	1.25	1.25	1.25	1.25	1.25	1.25	1.25	1.25	1.25	1.25	1.25	1.25	1.25	1.25	1.25	1.25	1.25	1.25	0	1.25	0	1.25	0	1.25	0	1.25	0	1.25	0
Nq1	49	Worsen (Cq1) - improve (Cq2)	1.25	ALL	3.75	3.75	3.75	3.75	3.75	3.75	3.75	3.75	3.75	3.75	3.75	3.75	3.75	3.75	3.75	3.75	3.75	3.75	3.75	3.75	3.75	3.75	3.75	3.75	3.75	3.75	3.75	3.75	3.75	3.75	3.75	0	3.75	0	3.75	0
				Physician	0	0	0	0	0	0	0	0	0	0	0	0	0	0	0	0	0	0	0	0	0	0	0	0	0	0	0	0	0	0	0	0	0	0	0	0
				Clinical Officer	0	0	0	0	0	0	0	0	0	0	0	0	0	0	0	0	0	0	0	0	0	0	0	0	1.25	1.25	1.25	1.25	1.25	1.25	1.25	0	1.25	0	1.25	0
				Nurse	1.25	1.25	1.25	1.25	1.25	1.25	1.25	1.25	1.25	1.25	1.25	1.25	1.25	1.25	1.25	1.25	1.25	1.25	1.25	1.25	1.25	1.25	1.25	1.25	0	0	0	0	0	0	0	0	0	0	0	0
				Pharmacist	1.25	1.25	1.25	1.25	1.25	1.25	1.25	1.25	1.25	1.25	1.25	1.25	1.25	1.25	1.25	1.25	1.25	1.25	1.25	1.25	1.25	1.25	1.25	1.25	1.25	1.25	1.25	1.25	1.25	1.25	1.25	0	1.25	0	1.25	0
				Triage Staff/Technician	1.25	1.25	1.25	1.25	1.25	1.25	1.25	1.25	1.25	1.25	1.25	1.25	1.25	1.25	1.25	1.25	1.25	1.25	1.25	1.25	1.25	1.25	1.25	1.25	1.25	1.25	1.25	1.25	1.25	1.25	1.25	0	1.25	0	1.25	0
Cq2	50	No change (Cq2)	2.08333	ALL	6.25	0	6.25	0	6.25	0	6.25	0	6.25	0	6.25	0	6.25	0	6.25	0	6.25	0	6.25	0	6.25	0	6.25	0	6.25	0	6.25	0	6.25	0	6.25	0	6.25	0	6.25	0
				Physician	0	0	0	0	0	0	0	0	0	0	0	0	0	0	0	0	0	0	0	0	0	0	0	0	0	0	0	0	0	0	0	0	0	0	0	0
				Clinical Officer	2.08333	0	2.08333	0	2.08333	0	2.08333	0	2.08333	0	2.08333	0	2.08333	0	2.08333	0	2.08333	0	2.08333	0	2.08333	0	2.08333	0	2.08333	0	2.08333	0	2.08333	0	2.08333	0	2.08333	0	2.08333	0
				Nurse	0	0	0	0	0	0	0	0	0	0	0	0	0	0	0	0	0	0	0	0	0	0	0	0	0	0	0	0	0	0	0	0	0	0	0	0
				Pharmacist	2.08333	0	2.08333	0	2.08333	0	2.08333	0	2.08333	0	2.08333	0	2.08333	0	2.08333	0	2.08333	0	2.08333	0	2.08333	0	2.08333	0	2.08333	0	2.08333	0	2.08333	0	2.08333	0	2.08333	0	2.08333	0
				Triage Staff/Technician	2.08333	0	2.08333	0	2.08333	0	2.08333	0	2.08333	0	2.08333	0	2.08333	0	2.08333	0	2.08333	0	2.08333	0	2.08333	0	2.08333	0	2.08333	0	2.08333	0	2.08333	0	2.08333	0	2.08333	0	2.08333	0
Cq2	51	Worsen (Cq1) - improve (Nq2)	2.08333	ALL	6.25	0	6.25	0	6.25	0	6.25	6.25	6.25	6.25	6.25	6.25	6.25	0	6.25	0	6.25	0	6.25	0	6.25	0	6.25	0	6.25	0	6.25	0	6.25	0	6.25	0	6.25	0	6.25	0
				Physician	0	0	0	0	0	0	0	0	0	0	0	0	0	0	0	0	0	0	0	0	0	0	0	0	0	0	0	0	0	0	0	0	0	0	0	0
				Clinical Officer	2.08333	0	2.08333	0	2.08333	0	2.08333	2.08333	2.08333	2.08333	2.08333	2.08333	0	0	0	0	0	0	0	0	0	0	0	0	0	0	0	0	0	0	0	0	0	0	0	0
				Nurse	0	0	0	0	0	0	0	0	0	0	0	0	2.08333	0	2.08333	0	2.08333	0	2.08333	0	2.08333	0	2.08333	0	2.08333	0	2.08333	0	2.08333	0	2.08333	0	2.08333	0	2.08333	0
				Pharmacist	2.08333	0	2.08333	0	2.08333	0	2.08333	2.08333	2.08333	2.08333	2.08333	2.08333	2.08333	0	2.08333	0	2.08333	0	2.08333	0	2.08333	0	2.08333	0	2.08333	0	2.08333	0	2.08333	0	2.08333	0	2.08333	0	2.08333	0
				Triage Staff/Technician	2.08333	0	2.08333	0	2.08333	0	2.08333	2.08333	2.08333	2.08333	2.08333	2.08333	2.08333	0	2.08333	0	2.08333	0	2.08333	0	2.08333	0	2.08333	0	2.08333	0	2.08333	0	2.08333	0	2.08333	0	2.08333	0	2.08333	0
Cq2	52	Worsen (Cq1) - improve (Nq2)	2.08333	ALL	6.25	0	6.25	0	6.25	0	6.25	0	6.25	0	6.25	0	6.25	6.25	6.25	6.25	6.25	6.25	6.25	0	6.25	0	6.25	0	6.25	0	6.25	0	6.25	0	6.25	0	6.25	0	6.25	0
				Physician	0	0	0	0	0	0	0	0	0	0	0	0	0	0	0	0	0	0	0	0	0	0	0	0	0	0	0	0	0	0	0	0	0	0	0	0
				Clinical Officer	2.08333	0	2.08333	0	2.08333	0	2.08333	0	2.08333	0	2.08333	0	2.08333	2.08333	2.08333	2.08333	2.08333	2.08333	0	0	0	0	0	0	0	0	0	0	0	0	0	0	0	0	0	0
				Nurse	0	0	0	0	0	0	0	0	0	0	0	0	0	0	0	0	0	0	2.08333	0	2.08333	0	2.08333	0	2.08333	0	2.08333	0	2.08333	0	2.08333	0	2.08333	0	2.08333	0
				Pharmacist	2.08333	0	2.08333	0	2.08333	0	2.08333	0	2.08333	0	2.08333	0	2.08333	2.08333	2.08333	2.08333	2.08333	2.08333	2.08333	0	2.08333	0	2.08333	0	2.08333	0	2.08333	0	2.08333	0	2.08333	0	2.08333	0	2.08333	0
				Triage Staff/Technician	2.08333	0	2.08333	0	2.08333	0	2.08333	0	2.08333	0	2.08333	0	2.08333	2.08333	2.08333	2.08333	2.08333	2.08333	2.08333	0	2.08333	0	2.08333	0	2.08333	0	2.08333	0	2.08333	0	2.08333	0	2.08333	0	2.08333	0
Cq2	53	Worsen (Cq1) - improve (Nq2)	2.08333	ALL	6.25	0	6.25	0	6.25	0	6.25	0	6.25	0	6.25	0	6.25	0	6.25	0	6.25	0	6.25	6.25	6.25	6.25	6.25	6.25	6.25	0	6.25	0	6.25	0	6.25	0	6.25	0	6.25	0
				Physician	0	0	0	0	0	0	0	0	0	0	0	0	0	0	0	0	0	0	0	0	0	0	0	0	0	0	0	0	0	0	0	0	0	0	0	0
				Clinical Officer	2.08333	0	2.08333	0	2.08333	0	2.08333	0	2.08333	0	2.08333	0	2.08333	0	2.08333	0	2.08333	0	2.08333	2.08333	2.08333	2.08333	2.08333	2.08333	0	0	0	0	0	0	0	0	0	0	0	0
				Nurse	0	0	0	0	0	0	0	0	0	0	0	0	0	0	0	0	0	0	0	0	0	0	0	0	2.08333	0	2.08333	0	2.08333	0	2.08333	0	2.08333	0	2.08333	0
				Pharmacist	2.08333	0	2.08333	0	2.08333	0	2.08333	0	2.08333	0	2.08333	0	2.08333	0	2.08333	0	2.08333	0	2.08333	2.08333	2.08333	2.08333	2.08333	2.08333	2.08333	0	2.08333	0	2.08333	0	2.08333	0	2.08333	0	2.08333	0
				Triage Staff/Technician	2.08333	0	2.08333	0	2.08333	0	2.08333	0	2.08333	0	2.08333	0	2.08333	0	2.08333	0	2.08333	0	2.08333	2.08333	2.08333	2.08333	2.08333	2.08333	2.08333	0	2.08333	0	2.08333	0	2.08333	0	2.08333	0	2.08333	0
Cq2	54	Worsen (Cq1) - improve (Nq2)	2.08333	ALL	6.25	0	6.25	0	6.25	0	6.25	0	6.25	0	6.25	0	6.25	0	6.25	0	6.25	0	6.25	0	6.25	0	6.25	0	6.25	6.25	6.25	6.25	6.25	6.25	6.25	0	6.25	0	6.25	0
				Physician	0	0	0	0	0	0	0	0	0	0	0	0	0	0	0	0	0	0	0	0	0	0	0	0	0	0	0	0	0	0	0	0	0	0	0	0
				Clinical Officer	2.08333	0	2.08333	0	2.08333	0	2.08333	0	2.08333	0	2.08333	0	2.08333	0	2.08333	0	2.08333	0	2.08333	0	2.08333	0	2.08333	0	2.08333	2.08333	2.08333	2.08333	2.08333	2.08333	0	0	0	0	0	0
				Nurse	0	0	0	0	0	0	0	0	0	0	0	0	0	0	0	0	0	0	0	0	0	0	0	0	0	0	0	0	0	0	2.08333	0	2.08333	0	2.08333	0
				Pharmacist	2.08333	0	2.08333	0	2.08333	0	2.08333	0	2.08333	0	2.08333	0	2.08333	0	2.08333	0	2.08333	0	2.08333	0	2.08333	0	2.08333	0	2.08333	2.08333	2.08333	2.08333	2.08333	2.08333	2.08333	0	2.08333	0	2.08333	0
				Triage Staff/Technician	2.08333	0	2.08333	0	2.08333	0	2.08333	0	2.08333	0	2.08333	0	2.08333	0	2.08333	0	2.08333	0	2.08333	0	2.08333	0	2.08333	0	2.08333	2.08333	2.08333	2.08333	2.08333	2.08333	2.08333	0	2.08333	0	2.08333	0
Cq2	55	Worsen (Cq1) - improve (Nq2)	2.08333	ALL	6.25	0	6.25	0	6.25	0	6.25	0	6.25	0	6.25	0	6.25	0	6.25	0	6.25	0	6.25	0	6.25	0	6.25	0	6.25	0	6.25	0	6.25	0	6.25	6.25	6.25	6.25	6.25	6.25
				Physician	0	0	0	0	0	0	0	0	0	0	0	0	0	0	0	0	0	0	0	0	0	0	0	0	0	0	0	0	0	0	0	0	0	0	0	0
				Clinical Officer	2.08333	0	2.08333	0	2.08333	0	2.08333	0	2.08333	0	2.08333	0	2.08333	0	2.08333	0	2.08333	0	2.08333	0	2.08333	0	2.08333	0	2.08333	0	2.08333	0	2.08333	0	2.08333	2.08333	2.08333	2.08333	2.08333	2.08333
				Nurse	0	0	0	0	0	0	0	0	0	0	0	0	0	0	0	0	0	0	0	0	0	0	0	0	0	0	0	0	0	0	0	0	0	0	0	0
				Pharmacist	2.08333	0	2.08333	0	2.08333	0	2.08333	0	2.08333	0	2.08333	0	2.08333	0	2.08333	0	2.08333	0	2.08333	0	2.08333	0	2.08333	0	2.08333	0	2.08333	0	2.08333	0	2.08333	2.08333	2.08333	2.08333	2.08333	2.08333
				Triage Staff/Technician	2.08333	0	2.08333	0	2.08333	0	2.08333	0	2.08333	0	2.08333	0	2.08333	0	2.08333	0	2.08333	0	2.08333	0	2.08333	0	2.08333	0	2.08333	0	2.08333	0	2.08333	0	2.08333	2.08333	2.08333	2.08333	2.08333	2.08333
Cq2	56	Worsen (Cq1) - improve (Cq2)	2.08333	ALL	6.25	0	6.25	0	6.25	0	6.25	6.25	6.25	6.25	6.25	6.25	6.25	0	6.25	0	6.25	0	6.25	0	6.25	0	6.25	0	6.25	0	6.25	0	6.25	0	6.25	0	6.25	0	6.25	0
				Physician	0	0	0	0	0	0	0	0	0	0	0	0	0	0	0	0	0	0	0	0	0	0	0	0	0	0	0	0	0	0	0	0	0	0	0	0
				Clinical Officer	2.08333	0	2.08333	0	2.08333	0	2.08333	2.08333	2.08333	2.08333	2.08333	2.08333	2.08333	0	2.08333	0	2.08333	0	2.08333	0	2.08333	0	2.08333	0	2.08333	0	2.08333	0	2.08333	0	2.08333	0	2.08333	0	2.08333	0
				Nurse	0	0	0	0	0	0	0	0	0	0	0	0	0	0	0	0	0	0	0	0	0	0	0	0	0	0	0	0	0	0	0	0	0	0	0	0
				Pharmacist	2.08333	0	2.08333	0	2.08333	0	2.08333	2.08333	2.08333	2.08333	2.08333	2.08333	2.08333	0	2.08333	0	2.08333	0	2.08333	0	2.08333	0	2.08333	0	2.08333	0	2.08333	0	2.08333	0	2.08333	0	2.08333	0	2.08333	0
				Triage Staff/Technician	2.08333	0	2.08333	0	2.08333	0	2.08333	2.08333	2.08333	2.08333	2.08333	2.08333	2.08333	0	2.08333	0	2.08333	0	2.08333	0	2.08333	0	2.08333	0	2.08333	0	2.08333	0	2.08333	0	2.08333	0	2.08333	0	2.08333	0
Cq2	57	Worsen (Cq1) - improve (Cq2)	2.08333	ALL	6.25	0	6.25	0	6.25	0	6.25	0	6.25	0	6.25	0	6.25	6.25	6.25	6.25	6.25	6.25	6.25	0	6.25	0	6.25	0	6.25	0	6.25	0	6.25	0	6.25	0	6.25	0	6.25	0
				Physician	0	0	0	0	0	0	0	0	0	0	0	0	0	0	0	0	0	0	0	0	0	0	0	0	0	0	0	0	0	0	0	0	0	0	0	0
				Clinical Officer	2.08333	0	2.08333	0	2.08333	0	2.08333	0	2.08333	0	2.08333	0	2.08333	2.08333	2.08333	2.08333	2.08333	2.08333	2.08333	0	2.08333	0	2.08333	0	2.08333	0	2.08333	0	2.08333	0	2.08333	0	2.08333	0	2.08333	0
				Nurse	0	0	0	0	0	0	0	0	0	0	0	0	0	0	0	0	0	0	0	0	0	0	0	0	0	0	0	0	0	0	0	0	0	0	0	0
				Pharmacist	2.08333	0	2.08333	0	2.08333	0	2.08333	0	2.08333	0	2.08333	0	2.08333	2.08333	2.08333	2.08333	2.08333	2.08333	2.08333	0	2.08333	0	2.08333	0	2.08333	0	2.08333	0	2.08333	0	2.08333	0	2.08333	0	2.08333	0
				Triage Staff/Technician	2.08333	0	2.08333	0	2.08333	0	2.08333	0	2.08333	0	2.08333	0	2.08333	2.08333	2.08333	2.08333	2.08333	2.08333	2.08333	0	2.08333	0	2.08333	0	2.08333	0	2.08333	0	2.08333	0	2.08333	0	2.08333	0	2.08333	0
Cq2	58	Worsen (Cq1) - improve (Cq2)	2.08333	ALL	6.25	0	6.25	0	6.25	0	6.25	0	6.25	0	6.25	0	6.25	0	6.25	0	6.25	0	6.25	6.25	6.25	6.25	6.25	6.25	6.25	0	6.25	0	6.25	0	6.25	0	6.25	0	6.25	0
				Physician	0	0	0	0	0	0	0	0	0	0	0	0	0	0	0	0	0	0	0	0	0	0	0	0	0	0	0	0	0	0	0	0	0	0	0	0
				Clinical Officer	2.08333	0	2.08333	0	2.08333	0	2.08333	0	2.08333	0	2.08333	0	2.08333	0	2.08333	0	2.08333	0	2.08333	2.08333	2.08333	2.08333	2.08333	2.08333	2.08333	0	2.08333	0	2.08333	0	2.08333	0	2.08333	0	2.08333	0
				Nurse	0	0	0	0	0	0	0	0	0	0	0	0	0	0	0	0	0	0	0	0	0	0	0	0	0	0	0	0	0	0	0	0	0	0	0	0
				Pharmacist	2.08333	0	2.08333	0	2.08333	0	2.08333	0	2.08333	0	2.08333	0	2.08333	0	2.08333	0	2.08333	0	2.08333	2.08333	2.08333	2.08333	2.08333	2.08333	2.08333	0	2.08333	0	2.08333	0	2.08333	0	2.08333	0	2.08333	0
				Triage Staff/Technician	2.08333	0	2.08333	0	2.08333	0	2.08333	0	2.08333	0	2.08333	0	2.08333	0	2.08333	0	2.08333	0	2.08333	2.08333	2.08333	2.08333	2.08333	2.08333	2.08333	0	2.08333	0	2.08333	0	2.08333	0	2.08333	0	2.08333	0
Cq2	59	Worsen (Cq1) - improve (Cq2)	2.08333	ALL	6.25	0	6.25	0	6.25	0	6.25	0	6.25	0	6.25	0	6.25	0	6.25	0	6.25	0	6.25	0	6.25	0	6.25	0	6.25	6.25	6.25	6.25	6.25	6.25	6.25	0	6.25	0	6.25	0
				Physician	0	0	0	0	0	0	0	0	0	0	0	0	0	0	0	0	0	0	0	0	0	0	0	0	0	0	0	0	0	0	0	0	0	0	0	0
				Clinical Officer	2.08333	0	2.08333	0	2.08333	0	2.08333	0	2.08333	0	2.08333	0	2.08333	0	2.08333	0	2.08333	0	2.08333	0	2.08333	0	2.08333	0	2.08333	2.08333	2.08333	2.08333	2.08333	2.08333	2.08333	0	2.08333	0	2.08333	0
				Nurse	0	0	0	0	0	0	0	0	0	0	0	0	0	0	0	0	0	0	0	0	0	0	0	0	0	0	0	0	0	0	0	0	0	0	0	0
				Pharmacist	2.08333	0	2.08333	0	2.08333	0	2.08333	0	2.08333	0	2.08333	0	2.08333	0	2.08333	0	2.08333	0	2.08333	0	2.08333	0	2.08333	0	2.08333	2.08333	2.08333	2.08333	2.08333	2.08333	2.08333	0	2.08333	0	2.08333	0
				Triage Staff/Technician	2.08333	0	2.08333	0	2.08333	0	2.08333	0	2.08333	0	2.08333	0	2.08333	0	2.08333	0	2.08333	0	2.08333	0	2.08333	0	2.08333	0	2.08333	2.08333	2.08333	2.08333	2.08333	2.08333	2.08333	0	2.08333	0	2.08333	0
Cq1	60	No change (Cq1)	0.520833	ALL	1.5625	1.5625	1.5625	1.5625	1.5625	1.5625	1.5625	1.5625	1.5625	1.5625	1.5625	1.5625	1.5625	1.5625	1.5625	1.5625	1.5625	1.5625	1.5625	1.5625	1.5625	1.5625	1.5625	1.5625	1.5625	1.5625	1.5625	1.5625	1.5625	1.5625	1.5625	1.5625	1.5625	1.5625	1.5625	1.5625
				Physician	0	0	0	0	0	0	0	0	0	0	0	0	0	0	0	0	0	0	0	0	0	0	0	0	0	0	0	0	0	0	0	0	0	0	0	0
				Clinical Officer	0.520833	0.520833	0.520833	0.520833	0.520833	0.520833	0.520833	0.520833	0.520833	0.520833	0.520833	0.520833	0.520833	0.520833	0.520833	0.520833	0.520833	0.520833	0.520833	0.520833	0.520833	0.520833	0.520833	0.520833	0.520833	0.520833	0.520833	0.520833	0.520833	0.520833	0.520833	0.520833	0.520833	0.520833	0.520833	0.520833
				Nurse	0	0	0	0	0	0	0	0	0	0	0	0	0	0	0	0	0	0	0	0	0	0	0	0	0	0	0	0	0	0	0	0	0	0	0	0
				Pharmacist	0.520833	0.520833	0.520833	0.520833	0.520833	0.520833	0.520833	0.520833	0.520833	0.520833	0.520833	0.520833	0.520833	0.520833	0.520833	0.520833	0.520833	0.520833	0.520833	0.520833	0.520833	0.520833	0.520833	0.520833	0.520833	0.520833	0.520833	0.520833	0.520833	0.520833	0.520833	0.520833	0.520833	0.520833	0.520833	0.520833
				Triage Staff/Technician	0.520833	0.520833	0.520833	0.520833	0.520833	0.520833	0.520833	0.520833	0.520833	0.520833	0.520833	0.520833	0.520833	0.520833	0.520833	0.520833	0.520833	0.520833	0.520833	0.520833	0.520833	0.520833	0.520833	0.520833	0.520833	0.520833	0.520833	0.520833	0.520833	0.520833	0.520833	0.520833	0.520833	0.520833	0.520833	0.520833
Cq1	61	Improve (Cq2)	0.520833	ALL	1.5625	1.5625	1.5625	1.5625	1.5625	1.5625	1.5625	0	1.5625	0	1.5625	0	1.5625	0	1.5625	0	1.5625	0	1.5625	0	1.5625	0	1.5625	0	1.5625	0	1.5625	0	1.5625	0	1.5625	0	1.5625	0	1.5625	0
				Physician	0	0	0	0	0	0	0	0	0	0	0	0	0	0	0	0	0	0	0	0	0	0	0	0	0	0	0	0	0	0	0	0	0	0	0	0
				Clinical Officer	0.520833	0.520833	0.520833	0.520833	0.520833	0.520833	0.520833	0	0.520833	0	0.520833	0	0.520833	0	0.520833	0	0.520833	0	0.520833	0	0.520833	0	0.520833	0	0.520833	0	0.520833	0	0.520833	0	0.520833	0	0.520833	0	0.520833	0
				Nurse	0	0	0	0	0	0	0	0	0	0	0	0	0	0	0	0	0	0	0	0	0	0	0	0	0	0	0	0	0	0	0	0	0	0	0	0
				Pharmacist	0.520833	0.520833	0.520833	0.520833	0.520833	0.520833	0.520833	0	0.520833	0	0.520833	0	0.520833	0	0.520833	0	0.520833	0	0.520833	0	0.520833	0	0.520833	0	0.520833	0	0.520833	0	0.520833	0	0.520833	0	0.520833	0	0.520833	0
				Triage Staff/Technician	0.520833	0.520833	0.520833	0.520833	0.520833	0.520833	0.520833	0	0.520833	0	0.520833	0	0.520833	0	0.520833	0	0.520833	0	0.520833	0	0.520833	0	0.520833	0	0.520833	0	0.520833	0	0.520833	0	0.520833	0	0.520833	0	0.520833	0
Cq1	62	Improve (Cq2)	0.520833	ALL	1.5625	1.5625	1.5625	1.5625	1.5625	1.5625	1.5625	1.5625	1.5625	1.5625	1.5625	1.5625	1.5625	0	1.5625	0	1.5625	0	1.5625	0	1.5625	0	1.5625	0	1.5625	0	1.5625	0	1.5625	0	1.5625	0	1.5625	0	1.5625	0
				Physician	0	0	0	0	0	0	0	0	0	0	0	0	0	0	0	0	0	0	0	0	0	0	0	0	0	0	0	0	0	0	0	0	0	0	0	0
				Clinical Officer	0.520833	0.520833	0.520833	0.520833	0.520833	0.520833	0.520833	0.520833	0.520833	0.520833	0.520833	0.520833	0.520833	0	0.520833	0	0.520833	0	0.520833	0	0.520833	0	0.520833	0	0.520833	0	0.520833	0	0.520833	0	0.520833	0	0.520833	0	0.520833	0
				Nurse	0	0	0	0	0	0	0	0	0	0	0	0	0	0	0	0	0	0	0	0	0	0	0	0	0	0	0	0	0	0	0	0	0	0	0	0
				Pharmacist	0.520833	0.520833	0.520833	0.520833	0.520833	0.520833	0.520833	0.520833	0.520833	0.520833	0.520833	0.520833	0.520833	0	0.520833	0	0.520833	0	0.520833	0	0.520833	0	0.520833	0	0.520833	0	0.520833	0	0.520833	0	0.520833	0	0.520833	0	0.520833	0
				Triage Staff/Technician	0.520833	0.520833	0.520833	0.520833	0.520833	0.520833	0.520833	0.520833	0.520833	0.520833	0.520833	0.520833	0.520833	0	0.520833	0	0.520833	0	0.520833	0	0.520833	0	0.520833	0	0.520833	0	0.520833	0	0.520833	0	0.520833	0	0.520833	0	0.520833	0
Cq1	63	Improve (Cq2)	0.520833	ALL	1.5625	1.5625	1.5625	1.5625	1.5625	1.5625	1.5625	1.5625	1.5625	1.5625	1.5625	1.5625	1.5625	1.5625	1.5625	1.5625	1.5625	1.5625	1.5625	0	1.5625	0	1.5625	0	1.5625	0	1.5625	0	1.5625	0	1.5625	0	1.5625	0	1.5625	0
				Physician	0	0	0	0	0	0	0	0	0	0	0	0	0	0	0	0	0	0	0	0	0	0	0	0	0	0	0	0	0	0	0	0	0	0	0	0
				Clinical Officer	0.520833	0.520833	0.520833	0.520833	0.520833	0.520833	0.520833	0.520833	0.520833	0.520833	0.520833	0.520833	0.520833	0.520833	0.520833	0.520833	0.520833	0.520833	0.520833	0	0.520833	0	0.520833	0	0.520833	0	0.520833	0	0.520833	0	0.520833	0	0.520833	0	0.520833	0
				Nurse	0	0	0	0	0	0	0	0	0	0	0	0	0	0	0	0	0	0	0	0	0	0	0	0	0	0	0	0	0	0	0	0	0	0	0	0
				Pharmacist	0.520833	0.520833	0.520833	0.520833	0.520833	0.520833	0.520833	0.520833	0.520833	0.520833	0.520833	0.520833	0.520833	0.520833	0.520833	0.520833	0.520833	0.520833	0.520833	0	0.520833	0	0.520833	0	0.520833	0	0.520833	0	0.520833	0	0.520833	0	0.520833	0	0.520833	0
				Triage Staff/Technician	0.520833	0.520833	0.520833	0.520833	0.520833	0.520833	0.520833	0.520833	0.520833	0.520833	0.520833	0.520833	0.520833	0.520833	0.520833	0.520833	0.520833	0.520833	0.520833	0	0.520833	0	0.520833	0	0.520833	0	0.520833	0	0.520833	0	0.520833	0	0.520833	0	0.520833	0
Cq1	64	Improve (Cq2)	0.520833	ALL	1.5625	1.5625	1.5625	1.5625	1.5625	1.5625	1.5625	1.5625	1.5625	1.5625	1.5625	1.5625	1.5625	1.5625	1.5625	1.5625	1.5625	1.5625	1.5625	1.5625	1.5625	1.5625	1.5625	1.5625	1.5625	0	1.5625	0	1.5625	0	1.5625	0	1.5625	0	1.5625	0
				Physician	0	0	0	0	0	0	0	0	0	0	0	0	0	0	0	0	0	0	0	0	0	0	0	0	0	0	0	0	0	0	0	0	0	0	0	0
				Clinical Officer	0.520833	0.520833	0.520833	0.520833	0.520833	0.520833	0.520833	0.520833	0.520833	0.520833	0.520833	0.520833	0.520833	0.520833	0.520833	0.520833	0.520833	0.520833	0.520833	0.520833	0.520833	0.520833	0.520833	0.520833	0.520833	0	0.520833	0	0.520833	0	0.520833	0	0.520833	0	0.520833	0
				Nurse	0	0	0	0	0	0	0	0	0	0	0	0	0	0	0	0	0	0	0	0	0	0	0	0	0	0	0	0	0	0	0	0	0	0	0	0
				Pharmacist	0.520833	0.520833	0.520833	0.520833	0.520833	0.520833	0.520833	0.520833	0.520833	0.520833	0.520833	0.520833	0.520833	0.520833	0.520833	0.520833	0.520833	0.520833	0.520833	0.520833	0.520833	0.520833	0.520833	0.520833	0.520833	0	0.520833	0	0.520833	0	0.520833	0	0.520833	0	0.520833	0
				Triage Staff/Technician	0.520833	0.520833	0.520833	0.520833	0.520833	0.520833	0.520833	0.520833	0.520833	0.520833	0.520833	0.520833	0.520833	0.520833	0.520833	0.520833	0.520833	0.520833	0.520833	0.520833	0.520833	0.520833	0.520833	0.520833	0.520833	0	0.520833	0	0.520833	0	0.520833	0	0.520833	0	0.520833	0
Cq1	65	Improve (Cq2)	0.520833	ALL	1.5625	1.5625	1.5625	1.5625	1.5625	1.5625	1.5625	1.5625	1.5625	1.5625	1.5625	1.5625	1.5625	1.5625	1.5625	1.5625	1.5625	1.5625	1.5625	1.5625	1.5625	1.5625	1.5625	1.5625	1.5625	1.5625	1.5625	1.5625	1.5625	1.5625	1.5625	0	1.5625	0	1.5625	0
				Physician	0	0	0	0	0	0	0	0	0	0	0	0	0	0	0	0	0	0	0	0	0	0	0	0	0	0	0	0	0	0	0	0	0	0	0	0
				Clinical Officer	0.520833	0.520833	0.520833	0.520833	0.520833	0.520833	0.520833	0.520833	0.520833	0.520833	0.520833	0.520833	0.520833	0.520833	0.520833	0.520833	0.520833	0.520833	0.520833	0.520833	0.520833	0.520833	0.520833	0.520833	0.520833	0.520833	0.520833	0.520833	0.520833	0.520833	0.520833	0	0.520833	0	0.520833	0
				Nurse	0	0	0	0	0	0	0	0	0	0	0	0	0	0	0	0	0	0	0	0	0	0	0	0	0	0	0	0	0	0	0	0	0	0	0	0
				Pharmacist	0.520833	0.520833	0.520833	0.520833	0.520833	0.520833	0.520833	0.520833	0.520833	0.520833	0.520833	0.520833	0.520833	0.520833	0.520833	0.520833	0.520833	0.520833	0.520833	0.520833	0.520833	0.520833	0.520833	0.520833	0.520833	0.520833	0.520833	0.520833	0.520833	0.520833	0.520833	0	0.520833	0	0.520833	0
				Triage Staff/Technician	0.520833	0.520833	0.520833	0.520833	0.520833	0.520833	0.520833	0.520833	0.520833	0.520833	0.520833	0.520833	0.520833	0.520833	0.520833	0.520833	0.520833	0.520833	0.520833	0.520833	0.520833	0.520833	0.520833	0.520833	0.520833	0.520833	0.520833	0.520833	0.520833	0.520833	0.520833	0	0.520833	0	0.520833	0
Cq1	66	Improve (Nq2)	0.520833	ALL	1.5625	1.5625	1.5625	1.5625	1.5625	1.5625	1.5625	0	1.5625	0	1.5625	0	1.5625	0	1.5625	0	1.5625	0	1.5625	0	1.5625	0	1.5625	0	1.5625	0	1.5625	0	1.5625	0	1.5625	0	1.5625	0	1.5625	0
				Physician	0	0	0	0	0	0	0	0	0	0	0	0	0	0	0	0	0	0	0	0	0	0	0	0	0	0	0	0	0	0	0	0	0	0	0	0
				Clinical Officer	0.520833	0.520833	0.520833	0.520833	0.520833	0.520833	0	0	0	0	0	0	0	0	0	0	0	0	0	0	0	0	0	0	0	0	0	0	0	0	0	0	0	0	0	0
				Nurse	0	0	0	0	0	0	0.520833	0	0.520833	0	0.520833	0	0.520833	0	0.520833	0	0.520833	0	0.520833	0	0.520833	0	0.520833	0	0.520833	0	0.520833	0	0.520833	0	0.520833	0	0.520833	0	0.520833	0
				Pharmacist	0.520833	0.520833	0.520833	0.520833	0.520833	0.520833	0.520833	0	0.520833	0	0.520833	0	0.520833	0	0.520833	0	0.520833	0	0.520833	0	0.520833	0	0.520833	0	0.520833	0	0.520833	0	0.520833	0	0.520833	0	0.520833	0	0.520833	0
				Triage Staff/Technician	0.520833	0.520833	0.520833	0.520833	0.520833	0.520833	0.520833	0	0.520833	0	0.520833	0	0.520833	0	0.520833	0	0.520833	0	0.520833	0	0.520833	0	0.520833	0	0.520833	0	0.520833	0	0.520833	0	0.520833	0	0.520833	0	0.520833	0
Cq1	67	Improve (Nq2)	0.520833	ALL	1.5625	1.5625	1.5625	1.5625	1.5625	1.5625	1.5625	1.5625	1.5625	1.5625	1.5625	1.5625	1.5625	0	1.5625	0	1.5625	0	1.5625	0	1.5625	0	1.5625	0	1.5625	0	1.5625	0	1.5625	0	1.5625	0	1.5625	0	1.5625	0
				Physician	0	0	0	0	0	0	0	0	0	0	0	0	0	0	0	0	0	0	0	0	0	0	0	0	0	0	0	0	0	0	0	0	0	0	0	0
				Clinical Officer	0.520833	0.520833	0.520833	0.520833	0.520833	0.520833	0.520833	0.520833	0.520833	0.520833	0.520833	0.520833	0	0	0	0	0	0	0	0	0	0	0	0	0	0	0	0	0	0	0	0	0	0	0	0
				Nurse	0	0	0	0	0	0	0	0	0	0	0	0	0.520833	0	0.520833	0	0.520833	0	0.520833	0	0.520833	0	0.520833	0	0.520833	0	0.520833	0	0.520833	0	0.520833	0	0.520833	0	0.520833	0
				Pharmacist	0.520833	0.520833	0.520833	0.520833	0.520833	0.520833	0.520833	0.520833	0.520833	0.520833	0.520833	0.520833	0.520833	0	0.520833	0	0.520833	0	0.520833	0	0.520833	0	0.520833	0	0.520833	0	0.520833	0	0.520833	0	0.520833	0	0.520833	0	0.520833	0
				Triage Staff/Technician	0.520833	0.520833	0.520833	0.520833	0.520833	0.520833	0.520833	0.520833	0.520833	0.520833	0.520833	0.520833	0.520833	0	0.520833	0	0.520833	0	0.520833	0	0.520833	0	0.520833	0	0.520833	0	0.520833	0	0.520833	0	0.520833	0	0.520833	0	0.520833	0
Cq1	68	Improve (Nq2)	0.520833	ALL	1.5625	1.5625	1.5625	1.5625	1.5625	1.5625	1.5625	1.5625	1.5625	1.5625	1.5625	1.5625	1.5625	1.5625	1.5625	1.5625	1.5625	1.5625	1.5625	0	1.5625	0	1.5625	0	1.5625	0	1.5625	0	1.5625	0	1.5625	0	1.5625	0	1.5625	0
				Physician	0	0	0	0	0	0	0	0	0	0	0	0	0	0	0	0	0	0	0	0	0	0	0	0	0	0	0	0	0	0	0	0	0	0	0	0
				Clinical Officer	0.520833	0.520833	0.520833	0.520833	0.520833	0.520833	0.520833	0.520833	0.520833	0.520833	0.520833	0.520833	0.520833	0.520833	0.520833	0.520833	0.520833	0.520833	0	0	0	0	0	0	0	0	0	0	0	0	0	0	0	0	0	0
				Nurse	0	0	0	0	0	0	0	0	0	0	0	0	0	0	0	0	0	0	0.520833	0	0.520833	0	0.520833	0	0.520833	0	0.520833	0	0.520833	0	0.520833	0	0.520833	0	0.520833	0
				Pharmacist	0.520833	0.520833	0.520833	0.520833	0.520833	0.520833	0.520833	0.520833	0.520833	0.520833	0.520833	0.520833	0.520833	0.520833	0.520833	0.520833	0.520833	0.520833	0.520833	0	0.520833	0	0.520833	0	0.520833	0	0.520833	0	0.520833	0	0.520833	0	0.520833	0	0.520833	0
				Triage Staff/Technician	0.520833	0.520833	0.520833	0.520833	0.520833	0.520833	0.520833	0.520833	0.520833	0.520833	0.520833	0.520833	0.520833	0.520833	0.520833	0.520833	0.520833	0.520833	0.520833	0	0.520833	0	0.520833	0	0.520833	0	0.520833	0	0.520833	0	0.520833	0	0.520833	0	0.520833	0
Cq1	69	Improve (Nq2)	0.520833	ALL	1.5625	1.5625	1.5625	1.5625	1.5625	1.5625	1.5625	1.5625	1.5625	1.5625	1.5625	1.5625	1.5625	1.5625	1.5625	1.5625	1.5625	1.5625	1.5625	1.5625	1.5625	1.5625	1.5625	1.5625	1.5625	0	1.5625	0	1.5625	0	1.5625	0	1.5625	0	1.5625	0
				Physician	0	0	0	0	0	0	0	0	0	0	0	0	0	0	0	0	0	0	0	0	0	0	0	0	0	0	0	0	0	0	0	0	0	0	0	0
				Clinical Officer	0.520833	0.520833	0.520833	0.520833	0.520833	0.520833	0.520833	0.520833	0.520833	0.520833	0.520833	0.520833	0.520833	0.520833	0.520833	0.520833	0.520833	0.520833	0.520833	0.520833	0.520833	0.520833	0.520833	0.520833	0	0	0	0	0	0	0	0	0	0	0	0
				Nurse	0	0	0	0	0	0	0	0	0	0	0	0	0	0	0	0	0	0	0	0	0	0	0	0	0.520833	0	0.520833	0	0.520833	0	0.520833	0	0.520833	0	0.520833	0
				Pharmacist	0.520833	0.520833	0.520833	0.520833	0.520833	0.520833	0.520833	0.520833	0.520833	0.520833	0.520833	0.520833	0.520833	0.520833	0.520833	0.520833	0.520833	0.520833	0.520833	0.520833	0.520833	0.520833	0.520833	0.520833	0.520833	0	0.520833	0	0.520833	0	0.520833	0	0.520833	0	0.520833	0
				Triage Staff/Technician	0.520833	0.520833	0.520833	0.520833	0.520833	0.520833	0.520833	0.520833	0.520833	0.520833	0.520833	0.520833	0.520833	0.520833	0.520833	0.520833	0.520833	0.520833	0.520833	0.520833	0.520833	0.520833	0.520833	0.520833	0.520833	0	0.520833	0	0.520833	0	0.520833	0	0.520833	0	0.520833	0
Cq1	70	Improve (Nq2)	0.520833	ALL	1.5625	1.5625	1.5625	1.5625	1.5625	1.5625	1.5625	1.5625	1.5625	1.5625	1.5625	1.5625	1.5625	1.5625	1.5625	1.5625	1.5625	1.5625	1.5625	1.5625	1.5625	1.5625	1.5625	1.5625	1.5625	1.5625	1.5625	1.5625	1.5625	1.5625	1.5625	0	1.5625	0	1.5625	0
				Physician	0	0	0	0	0	0	0	0	0	0	0	0	0	0	0	0	0	0	0	0	0	0	0	0	0	0	0	0	0	0	0	0	0	0	0	0
				Clinical Officer	0.520833	0.520833	0.520833	0.520833	0.520833	0.520833	0.520833	0.520833	0.520833	0.520833	0.520833	0.520833	0.520833	0.520833	0.520833	0.520833	0.520833	0.520833	0.520833	0.520833	0.520833	0.520833	0.520833	0.520833	0.520833	0.520833	0.520833	0.520833	0.520833	0.520833	0	0	0	0	0	0
				Nurse	0	0	0	0	0	0	0	0	0	0	0	0	0	0	0	0	0	0	0	0	0	0	0	0	0	0	0	0	0	0	0.520833	0	0.520833	0	0.520833	0
				Pharmacist	0.520833	0.520833	0.520833	0.520833	0.520833	0.520833	0.520833	0.520833	0.520833	0.520833	0.520833	0.520833	0.520833	0.520833	0.520833	0.520833	0.520833	0.520833	0.520833	0.520833	0.520833	0.520833	0.520833	0.520833	0.520833	0.520833	0.520833	0.520833	0.520833	0.520833	0.520833	0	0.520833	0	0.520833	0
				Triage Staff/Technician	0.520833	0.520833	0.520833	0.520833	0.520833	0.520833	0.520833	0.520833	0.520833	0.520833	0.520833	0.520833	0.520833	0.520833	0.520833	0.520833	0.520833	0.520833	0.520833	0.520833	0.520833	0.520833	0.520833	0.520833	0.520833	0.520833	0.520833	0.520833	0.520833	0.520833	0.520833	0	0.520833	0	0.520833	0
Cq1	71	Worsen (Pq1) - improve (Cq1)	0.520833	ALL	1.5625	1.5625	1.5625	1.5625	1.5625	1.5625	1.5625	1.5625	1.5625	1.5625	1.5625	1.5625	1.5625	1.5625	1.5625	1.5625	1.5625	1.5625	1.5625	1.5625	1.5625	1.5625	1.5625	1.5625	1.5625	1.5625	1.5625	1.5625	1.5625	1.5625	1.5625	1.5625	1.5625	1.5625	1.5625	1.5625
				Physician	0	0	0	0	0	0	0.520833	0.520833	0.520833	0.520833	0.520833	0.520833	0	0	0	0	0	0	0	0	0	0	0	0	0	0	0	0	0	0	0	0	0	0	0	0
				Clinical Officer	0.520833	0.520833	0.520833	0.520833	0.520833	0.520833	0	0	0	0	0	0	0.520833	0.520833	0.520833	0.520833	0.520833	0.520833	0.520833	0.520833	0.520833	0.520833	0.520833	0.520833	0.520833	0.520833	0.520833	0.520833	0.520833	0.520833	0.520833	0.520833	0.520833	0.520833	0.520833	0.520833
				Nurse	0	0	0	0	0	0	0	0	0	0	0	0	0	0	0	0	0	0	0	0	0	0	0	0	0	0	0	0	0	0	0	0	0	0	0	0
				Pharmacist	0.520833	0.520833	0.520833	0.520833	0.520833	0.520833	0.520833	0.520833	0.520833	0.520833	0.520833	0.520833	0.520833	0.520833	0.520833	0.520833	0.520833	0.520833	0.520833	0.520833	0.520833	0.520833	0.520833	0.520833	0.520833	0.520833	0.520833	0.520833	0.520833	0.520833	0.520833	0.520833	0.520833	0.520833	0.520833	0.520833
				Triage Staff/Technician	0.520833	0.520833	0.520833	0.520833	0.520833	0.520833	0.520833	0.520833	0.520833	0.520833	0.520833	0.520833	0.520833	0.520833	0.520833	0.520833	0.520833	0.520833	0.520833	0.520833	0.520833	0.520833	0.520833	0.520833	0.520833	0.520833	0.520833	0.520833	0.520833	0.520833	0.520833	0.520833	0.520833	0.520833	0.520833	0.520833
Cq1	72	Worsen (Pq1) - improve (Cq1)	0.520833	ALL	1.5625	1.5625	1.5625	1.5625	1.5625	1.5625	1.5625	1.5625	1.5625	1.5625	1.5625	1.5625	1.5625	1.5625	1.5625	1.5625	1.5625	1.5625	1.5625	1.5625	1.5625	1.5625	1.5625	1.5625	1.5625	1.5625	1.5625	1.5625	1.5625	1.5625	1.5625	1.5625	1.5625	1.5625	1.5625	1.5625
				Physician	0	0	0	0	0	0	0	0	0	0	0	0	0.520833	0.520833	0.520833	0.520833	0.520833	0.520833	0	0	0	0	0	0	0	0	0	0	0	0	0	0	0	0	0	0
				Clinical Officer	0.520833	0.520833	0.520833	0.520833	0.520833	0.520833	0.520833	0.520833	0.520833	0.520833	0.520833	0.520833	0	0	0	0	0	0	0.520833	0.520833	0.520833	0.520833	0.520833	0.520833	0.520833	0.520833	0.520833	0.520833	0.520833	0.520833	0.520833	0.520833	0.520833	0.520833	0.520833	0.520833
				Nurse	0	0	0	0	0	0	0	0	0	0	0	0	0	0	0	0	0	0	0	0	0	0	0	0	0	0	0	0	0	0	0	0	0	0	0	0
				Pharmacist	0.520833	0.520833	0.520833	0.520833	0.520833	0.520833	0.520833	0.520833	0.520833	0.520833	0.520833	0.520833	0.520833	0.520833	0.520833	0.520833	0.520833	0.520833	0.520833	0.520833	0.520833	0.520833	0.520833	0.520833	0.520833	0.520833	0.520833	0.520833	0.520833	0.520833	0.520833	0.520833	0.520833	0.520833	0.520833	0.520833
				Triage Staff/Technician	0.520833	0.520833	0.520833	0.520833	0.520833	0.520833	0.520833	0.520833	0.520833	0.520833	0.520833	0.520833	0.520833	0.520833	0.520833	0.520833	0.520833	0.520833	0.520833	0.520833	0.520833	0.520833	0.520833	0.520833	0.520833	0.520833	0.520833	0.520833	0.520833	0.520833	0.520833	0.520833	0.520833	0.520833	0.520833	0.520833
Cq1	73	Worsen (Pq1) - improve (Cq1)	0.520833	ALL	1.5625	1.5625	1.5625	1.5625	1.5625	1.5625	1.5625	1.5625	1.5625	1.5625	1.5625	1.5625	1.5625	1.5625	1.5625	1.5625	1.5625	1.5625	1.5625	1.5625	1.5625	1.5625	1.5625	1.5625	1.5625	1.5625	1.5625	1.5625	1.5625	1.5625	1.5625	1.5625	1.5625	1.5625	1.5625	1.5625
				Physician	0	0	0	0	0	0	0	0	0	0	0	0	0	0	0	0	0	0	0.520833	0.520833	0.520833	0.520833	0.520833	0.520833	0	0	0	0	0	0	0	0	0	0	0	0
				Clinical Officer	0.520833	0.520833	0.520833	0.520833	0.520833	0.520833	0.520833	0.520833	0.520833	0.520833	0.520833	0.520833	0.520833	0.520833	0.520833	0.520833	0.520833	0.520833	0	0	0	0	0	0	0.520833	0.520833	0.520833	0.520833	0.520833	0.520833	0.520833	0.520833	0.520833	0.520833	0.520833	0.520833
				Nurse	0	0	0	0	0	0	0	0	0	0	0	0	0	0	0	0	0	0	0	0	0	0	0	0	0	0	0	0	0	0	0	0	0	0	0	0
				Pharmacist	0.520833	0.520833	0.520833	0.520833	0.520833	0.520833	0.520833	0.520833	0.520833	0.520833	0.520833	0.520833	0.520833	0.520833	0.520833	0.520833	0.520833	0.520833	0.520833	0.520833	0.520833	0.520833	0.520833	0.520833	0.520833	0.520833	0.520833	0.520833	0.520833	0.520833	0.520833	0.520833	0.520833	0.520833	0.520833	0.520833
				Triage Staff/Technician	0.520833	0.520833	0.520833	0.520833	0.520833	0.520833	0.520833	0.520833	0.520833	0.520833	0.520833	0.520833	0.520833	0.520833	0.520833	0.520833	0.520833	0.520833	0.520833	0.520833	0.520833	0.520833	0.520833	0.520833	0.520833	0.520833	0.520833	0.520833	0.520833	0.520833	0.520833	0.520833	0.520833	0.520833	0.520833	0.520833
Cq1	74	Worsen (Pq1) - improve (Cq1)	0.520833	ALL	1.5625	1.5625	1.5625	1.5625	1.5625	1.5625	1.5625	1.5625	1.5625	1.5625	1.5625	1.5625	1.5625	1.5625	1.5625	1.5625	1.5625	1.5625	1.5625	1.5625	1.5625	1.5625	1.5625	1.5625	1.5625	1.5625	1.5625	1.5625	1.5625	1.5625	1.5625	1.5625	1.5625	1.5625	1.5625	1.5625
				Physician	0	0	0	0	0	0	0	0	0	0	0	0	0	0	0	0	0	0	0	0	0	0	0	0	0.520833	0.520833	0.520833	0.520833	0.520833	0.520833	0	0	0	0	0	0
				Clinical Officer	0.520833	0.520833	0.520833	0.520833	0.520833	0.520833	0.520833	0.520833	0.520833	0.520833	0.520833	0.520833	0.520833	0.520833	0.520833	0.520833	0.520833	0.520833	0.520833	0.520833	0.520833	0.520833	0.520833	0.520833	0	0	0	0	0	0	0.520833	0.520833	0.520833	0.520833	0.520833	0.520833
				Nurse	0	0	0	0	0	0	0	0	0	0	0	0	0	0	0	0	0	0	0	0	0	0	0	0	0	0	0	0	0	0	0	0	0	0	0	0
				Pharmacist	0.520833	0.520833	0.520833	0.520833	0.520833	0.520833	0.520833	0.520833	0.520833	0.520833	0.520833	0.520833	0.520833	0.520833	0.520833	0.520833	0.520833	0.520833	0.520833	0.520833	0.520833	0.520833	0.520833	0.520833	0.520833	0.520833	0.520833	0.520833	0.520833	0.520833	0.520833	0.520833	0.520833	0.520833	0.520833	0.520833
				Triage Staff/Technician	0.520833	0.520833	0.520833	0.520833	0.520833	0.520833	0.520833	0.520833	0.520833	0.520833	0.520833	0.520833	0.520833	0.520833	0.520833	0.520833	0.520833	0.520833	0.520833	0.520833	0.520833	0.520833	0.520833	0.520833	0.520833	0.520833	0.520833	0.520833	0.520833	0.520833	0.520833	0.520833	0.520833	0.520833	0.520833	0.520833
Cq1	75	Worsen (Pq1) - improve (Cq1)	0.520833	ALL	1.5625	1.5625	1.5625	1.5625	1.5625	1.5625	1.5625	1.5625	1.5625	1.5625	1.5625	1.5625	1.5625	1.5625	1.5625	1.5625	1.5625	1.5625	1.5625	1.5625	1.5625	1.5625	1.5625	1.5625	1.5625	1.5625	1.5625	1.5625	1.5625	1.5625	1.5625	1.5625	1.5625	1.5625	1.5625	1.5625
				Physician	0	0	0	0	0	0	0	0	0	0	0	0	0	0	0	0	0	0	0	0	0	0	0	0	0	0	0	0	0	0	0.520833	0.520833	0.520833	0.520833	0.520833	0.520833
				Clinical Officer	0.520833	0.520833	0.520833	0.520833	0.520833	0.520833	0.520833	0.520833	0.520833	0.520833	0.520833	0.520833	0.520833	0.520833	0.520833	0.520833	0.520833	0.520833	0.520833	0.520833	0.520833	0.520833	0.520833	0.520833	0.520833	0.520833	0.520833	0.520833	0.520833	0.520833	0	0	0	0	0	0
				Nurse	0	0	0	0	0	0	0	0	0	0	0	0	0	0	0	0	0	0	0	0	0	0	0	0	0	0	0	0	0	0	0	0	0	0	0	0
				Pharmacist	0.520833	0.520833	0.520833	0.520833	0.520833	0.520833	0.520833	0.520833	0.520833	0.520833	0.520833	0.520833	0.520833	0.520833	0.520833	0.520833	0.520833	0.520833	0.520833	0.520833	0.520833	0.520833	0.520833	0.520833	0.520833	0.520833	0.520833	0.520833	0.520833	0.520833	0.520833	0.520833	0.520833	0.520833	0.520833	0.520833
				Triage Staff/Technician	0.520833	0.520833	0.520833	0.520833	0.520833	0.520833	0.520833	0.520833	0.520833	0.520833	0.520833	0.520833	0.520833	0.520833	0.520833	0.520833	0.520833	0.520833	0.520833	0.520833	0.520833	0.520833	0.520833	0.520833	0.520833	0.520833	0.520833	0.520833	0.520833	0.520833	0.520833	0.520833	0.520833	0.520833	0.520833	0.520833
Pq1	76	No change (Pq1)	1.38889	ALL	4.16667	4.16667	4.16667	4.16667	4.16667	4.16667	4.16667	4.16667	4.16667	4.16667	4.16667	4.16667	4.16667	4.16667	4.16667	4.16667	4.16667	4.16667	4.16667	4.16667	4.16667	4.16667	4.16667	4.16667	4.16667	4.16667	4.16667	4.16667	4.16667	4.16667	4.16667	4.16667	4.16667	4.16667	4.16667	4.16667
				Physician	1.38889	1.38889	1.38889	1.38889	1.38889	1.38889	1.38889	1.38889	1.38889	1.38889	1.38889	1.38889	1.38889	1.38889	1.38889	1.38889	1.38889	1.38889	1.38889	1.38889	1.38889	1.38889	1.38889	1.38889	1.38889	1.38889	1.38889	1.38889	1.38889	1.38889	1.38889	1.38889	1.38889	1.38889	1.38889	1.38889
				Clinical Officer	0	0	0	0	0	0	0	0	0	0	0	0	0	0	0	0	0	0	0	0	0	0	0	0	0	0	0	0	0	0	0	0	0	0	0	0
				Nurse	0	0	0	0	0	0	0	0	0	0	0	0	0	0	0	0	0	0	0	0	0	0	0	0	0	0	0	0	0	0	0	0	0	0	0	0
				Pharmacist	1.38889	1.38889	1.38889	1.38889	1.38889	1.38889	1.38889	1.38889	1.38889	1.38889	1.38889	1.38889	1.38889	1.38889	1.38889	1.38889	1.38889	1.38889	1.38889	1.38889	1.38889	1.38889	1.38889	1.38889	1.38889	1.38889	1.38889	1.38889	1.38889	1.38889	1.38889	1.38889	1.38889	1.38889	1.38889	1.38889
				Triage Staff/Technician	1.38889	1.38889	1.38889	1.38889	1.38889	1.38889	1.38889	1.38889	1.38889	1.38889	1.38889	1.38889	1.38889	1.38889	1.38889	1.38889	1.38889	1.38889	1.38889	1.38889	1.38889	1.38889	1.38889	1.38889	1.38889	1.38889	1.38889	1.38889	1.38889	1.38889	1.38889	1.38889	1.38889	1.38889	1.38889	1.38889
Pq1	77	Improve (Cq1)	1.38889	ALL	4.16667	4.16667	4.16667	4.16667	4.16667	4.16667	4.16667	4.16667	4.16667	4.16667	4.16667	4.16667	4.16667	4.16667	4.16667	4.16667	4.16667	4.16667	4.16667	4.16667	4.16667	4.16667	4.16667	4.16667	4.16667	4.16667	4.16667	4.16667	4.16667	4.16667	4.16667	4.16667	4.16667	4.16667	4.16667	4.16667
				Physician	1.38889	1.38889	1.38889	1.38889	1.38889	1.38889	0	0	0	0	0	0	0	0	0	0	0	0	0	0	0	0	0	0	0	0	0	0	0	0	0	0	0	0	0	0
				Clinical Officer	0	0	0	0	0	0	1.38889	1.38889	1.38889	1.38889	1.38889	1.38889	1.38889	1.38889	1.38889	1.38889	1.38889	1.38889	1.38889	1.38889	1.38889	1.38889	1.38889	1.38889	1.38889	1.38889	1.38889	1.38889	1.38889	1.38889	1.38889	1.38889	1.38889	1.38889	1.38889	1.38889
				Nurse	0	0	0	0	0	0	0	0	0	0	0	0	0	0	0	0	0	0	0	0	0	0	0	0	0	0	0	0	0	0	0	0	0	0	0	0
				Pharmacist	1.38889	1.38889	1.38889	1.38889	1.38889	1.38889	1.38889	1.38889	1.38889	1.38889	1.38889	1.38889	1.38889	1.38889	1.38889	1.38889	1.38889	1.38889	1.38889	1.38889	1.38889	1.38889	1.38889	1.38889	1.38889	1.38889	1.38889	1.38889	1.38889	1.38889	1.38889	1.38889	1.38889	1.38889	1.38889	1.38889
				Triage Staff/Technician	1.38889	1.38889	1.38889	1.38889	1.38889	1.38889	1.38889	1.38889	1.38889	1.38889	1.38889	1.38889	1.38889	1.38889	1.38889	1.38889	1.38889	1.38889	1.38889	1.38889	1.38889	1.38889	1.38889	1.38889	1.38889	1.38889	1.38889	1.38889	1.38889	1.38889	1.38889	1.38889	1.38889	1.38889	1.38889	1.38889
Pq1	78	Improve (Cq1)	1.38889	ALL	4.16667	4.16667	4.16667	4.16667	4.16667	4.16667	4.16667	4.16667	4.16667	4.16667	4.16667	4.16667	4.16667	4.16667	4.16667	4.16667	4.16667	4.16667	4.16667	4.16667	4.16667	4.16667	4.16667	4.16667	4.16667	4.16667	4.16667	4.16667	4.16667	4.16667	4.16667	4.16667	4.16667	4.16667	4.16667	4.16667
				Physician	1.38889	1.38889	1.38889	1.38889	1.38889	1.38889	1.38889	1.38889	1.38889	1.38889	1.38889	1.38889	0	0	0	0	0	0	0	0	0	0	0	0	0	0	0	0	0	0	0	0	0	0	0	0
				Clinical Officer	0	0	0	0	0	0	0	0	0	0	0	0	1.38889	1.38889	1.38889	1.38889	1.38889	1.38889	1.38889	1.38889	1.38889	1.38889	1.38889	1.38889	1.38889	1.38889	1.38889	1.38889	1.38889	1.38889	1.38889	1.38889	1.38889	1.38889	1.38889	1.38889
				Nurse	0	0	0	0	0	0	0	0	0	0	0	0	0	0	0	0	0	0	0	0	0	0	0	0	0	0	0	0	0	0	0	0	0	0	0	0
				Pharmacist	1.38889	1.38889	1.38889	1.38889	1.38889	1.38889	1.38889	1.38889	1.38889	1.38889	1.38889	1.38889	1.38889	1.38889	1.38889	1.38889	1.38889	1.38889	1.38889	1.38889	1.38889	1.38889	1.38889	1.38889	1.38889	1.38889	1.38889	1.38889	1.38889	1.38889	1.38889	1.38889	1.38889	1.38889	1.38889	1.38889
				Triage Staff/Technician	1.38889	1.38889	1.38889	1.38889	1.38889	1.38889	1.38889	1.38889	1.38889	1.38889	1.38889	1.38889	1.38889	1.38889	1.38889	1.38889	1.38889	1.38889	1.38889	1.38889	1.38889	1.38889	1.38889	1.38889	1.38889	1.38889	1.38889	1.38889	1.38889	1.38889	1.38889	1.38889	1.38889	1.38889	1.38889	1.38889
Pq1	79	Improve (Cq1)	1.38889	ALL	4.16667	4.16667	4.16667	4.16667	4.16667	4.16667	4.16667	4.16667	4.16667	4.16667	4.16667	4.16667	4.16667	4.16667	4.16667	4.16667	4.16667	4.16667	4.16667	4.16667	4.16667	4.16667	4.16667	4.16667	4.16667	4.16667	4.16667	4.16667	4.16667	4.16667	4.16667	4.16667	4.16667	4.16667	4.16667	4.16667
				Physician	1.38889	1.38889	1.38889	1.38889	1.38889	1.38889	1.38889	1.38889	1.38889	1.38889	1.38889	1.38889	1.38889	1.38889	1.38889	1.38889	1.38889	1.38889	0	0	0	0	0	0	0	0	0	0	0	0	0	0	0	0	0	0
				Clinical Officer	0	0	0	0	0	0	0	0	0	0	0	0	0	0	0	0	0	0	1.38889	1.38889	1.38889	1.38889	1.38889	1.38889	1.38889	1.38889	1.38889	1.38889	1.38889	1.38889	1.38889	1.38889	1.38889	1.38889	1.38889	1.38889
				Nurse	0	0	0	0	0	0	0	0	0	0	0	0	0	0	0	0	0	0	0	0	0	0	0	0	0	0	0	0	0	0	0	0	0	0	0	0
				Pharmacist	1.38889	1.38889	1.38889	1.38889	1.38889	1.38889	1.38889	1.38889	1.38889	1.38889	1.38889	1.38889	1.38889	1.38889	1.38889	1.38889	1.38889	1.38889	1.38889	1.38889	1.38889	1.38889	1.38889	1.38889	1.38889	1.38889	1.38889	1.38889	1.38889	1.38889	1.38889	1.38889	1.38889	1.38889	1.38889	1.38889
				Triage Staff/Technician	1.38889	1.38889	1.38889	1.38889	1.38889	1.38889	1.38889	1.38889	1.38889	1.38889	1.38889	1.38889	1.38889	1.38889	1.38889	1.38889	1.38889	1.38889	1.38889	1.38889	1.38889	1.38889	1.38889	1.38889	1.38889	1.38889	1.38889	1.38889	1.38889	1.38889	1.38889	1.38889	1.38889	1.38889	1.38889	1.38889
Pq1	80	Improve (Cq1)	1.38889	ALL	4.16667	4.16667	4.16667	4.16667	4.16667	4.16667	4.16667	4.16667	4.16667	4.16667	4.16667	4.16667	4.16667	4.16667	4.16667	4.16667	4.16667	4.16667	4.16667	4.16667	4.16667	4.16667	4.16667	4.16667	4.16667	4.16667	4.16667	4.16667	4.16667	4.16667	4.16667	4.16667	4.16667	4.16667	4.16667	4.16667
				Physician	1.38889	1.38889	1.38889	1.38889	1.38889	1.38889	1.38889	1.38889	1.38889	1.38889	1.38889	1.38889	1.38889	1.38889	1.38889	1.38889	1.38889	1.38889	1.38889	1.38889	1.38889	1.38889	1.38889	1.38889	0	0	0	0	0	0	0	0	0	0	0	0
				Clinical Officer	0	0	0	0	0	0	0	0	0	0	0	0	0	0	0	0	0	0	0	0	0	0	0	0	1.38889	1.38889	1.38889	1.38889	1.38889	1.38889	1.38889	1.38889	1.38889	1.38889	1.38889	1.38889
				Nurse	0	0	0	0	0	0	0	0	0	0	0	0	0	0	0	0	0	0	0	0	0	0	0	0	0	0	0	0	0	0	0	0	0	0	0	0
				Pharmacist	1.38889	1.38889	1.38889	1.38889	1.38889	1.38889	1.38889	1.38889	1.38889	1.38889	1.38889	1.38889	1.38889	1.38889	1.38889	1.38889	1.38889	1.38889	1.38889	1.38889	1.38889	1.38889	1.38889	1.38889	1.38889	1.38889	1.38889	1.38889	1.38889	1.38889	1.38889	1.38889	1.38889	1.38889	1.38889	1.38889
				Triage Staff/Technician	1.38889	1.38889	1.38889	1.38889	1.38889	1.38889	1.38889	1.38889	1.38889	1.38889	1.38889	1.38889	1.38889	1.38889	1.38889	1.38889	1.38889	1.38889	1.38889	1.38889	1.38889	1.38889	1.38889	1.38889	1.38889	1.38889	1.38889	1.38889	1.38889	1.38889	1.38889	1.38889	1.38889	1.38889	1.38889	1.38889
Pq1	81	Improve (Cq1)	1.38889	ALL	4.16667	4.16667	4.16667	4.16667	4.16667	4.16667	4.16667	4.16667	4.16667	4.16667	4.16667	4.16667	4.16667	4.16667	4.16667	4.16667	4.16667	4.16667	4.16667	4.16667	4.16667	4.16667	4.16667	4.16667	4.16667	4.16667	4.16667	4.16667	4.16667	4.16667	4.16667	4.16667	4.16667	4.16667	4.16667	4.16667
				Physician	1.38889	1.38889	1.38889	1.38889	1.38889	1.38889	1.38889	1.38889	1.38889	1.38889	1.38889	1.38889	1.38889	1.38889	1.38889	1.38889	1.38889	1.38889	1.38889	1.38889	1.38889	1.38889	1.38889	1.38889	1.38889	1.38889	1.38889	1.38889	1.38889	1.38889	0	0	0	0	0	0
				Clinical Officer	0	0	0	0	0	0	0	0	0	0	0	0	0	0	0	0	0	0	0	0	0	0	0	0	0	0	0	0	0	0	1.38889	1.38889	1.38889	1.38889	1.38889	1.38889
				Nurse	0	0	0	0	0	0	0	0	0	0	0	0	0	0	0	0	0	0	0	0	0	0	0	0	0	0	0	0	0	0	0	0	0	0	0	0
				Pharmacist	1.38889	1.38889	1.38889	1.38889	1.38889	1.38889	1.38889	1.38889	1.38889	1.38889	1.38889	1.38889	1.38889	1.38889	1.38889	1.38889	1.38889	1.38889	1.38889	1.38889	1.38889	1.38889	1.38889	1.38889	1.38889	1.38889	1.38889	1.38889	1.38889	1.38889	1.38889	1.38889	1.38889	1.38889	1.38889	1.38889
				Triage Staff/Technician	1.38889	1.38889	1.38889	1.38889	1.38889	1.38889	1.38889	1.38889	1.38889	1.38889	1.38889	1.38889	1.38889	1.38889	1.38889	1.38889	1.38889	1.38889	1.38889	1.38889	1.38889	1.38889	1.38889	1.38889	1.38889	1.38889	1.38889	1.38889	1.38889	1.38889	1.38889	1.38889	1.38889	1.38889	1.38889	1.38889
		Patients enrolled/month	83.3333
				Worksheet C: Composite number of visits per patient type, accumulated over 3 years
					Year 1												Year 2												Year 3
					1	2	3	4	5	6	7	8	9	10	11	12	13	14	15	16	17	18	19	20	21	22	23	24	25	26	27	28	29	30	31	32	33	34	35	36
				Physician	9.16667	8.33333	8.33333	8.33333	8.33333	8.33333	8.29861	7.46528	7.46528	7.46528	7.46528	7.46528	6.90972	6.07639	6.07639	6.07639	6.07639	6.07639	5.52083	4.6875	4.6875	4.6875	4.6875	4.6875	4.13194	3.29861	3.29861	3.29861	3.29861	3.29861	2.74306	1.90972	1.90972	1.90972	1.90972	1.90972
				Clinical Officer	29.1667	8.33333	29.1667	8.33333	29.1667	8.33333	33.7683	16.5808	33.7683	16.5808	33.7683	16.5808	34.6802	16.928	34.6802	16.928	34.6802	16.928	35.5921	17.2752	35.5921	17.2752	35.5921	17.2752	36.504	17.6224	36.504	17.6224	36.504	17.6224	35.2887	13.7591	35.2887	13.7591	35.2887	13.7591
				Nurse	45.4167	25	41.6667	25	41.6667	25	41.6831	22.5877	37.5164	22.5877	37.5164	22.5877	42.1601	17.5877	36.2829	17.5877	36.2829	17.5877	42.6371	12.5877	35.0493	12.5877	35.0493	12.5877	43.114	7.58772	33.8158	7.58772	33.8158	7.58772	45.7182	2.54386	34.2928	2.54386	34.2928	2.54386
				Pharmacist	79.5833	41.6667	79.1667	41.6667	79.1667	41.6667	79.1667	46.6338	78.75	46.6338	78.75	46.6338	77.4561	40.5921	77.0395	40.5921	77.0395	40.5921	75.7456	34.5504	75.3289	34.5504	75.3289	34.5504	74.0351	28.5088	73.6184	28.5088	73.6184	28.5088	71.9079	18.2127	71.4912	18.2127	71.4912	18.2127
				Triage Staff/Technician	82.9167	41.6667	79.1667	41.6667	79.1667	41.6667	82.9167	46.6338	78.75	46.6338	78.75	46.6338	82.9167	40.5921	77.0395	40.5921	77.0395	40.5921	82.9167	34.5504	75.3289	34.5504	75.3289	34.5504	82.9167	28.5088	73.6184	28.5088	73.6184	28.5088	82.9167	18.2127	71.4912	18.2127	71.4912	18.2127
				Physician		9.16667	8.33333	8.33333	8.33333	8.33333	8.33333	8.29861	7.46528	7.46528	7.46528	7.46528	7.46528	6.90972	6.07639	6.07639	6.07639	6.07639	6.07639	5.52083	4.6875	4.6875	4.6875	4.6875	4.6875	4.13194	3.29861	3.29861	3.29861	3.29861	3.29861	2.74306	1.90972	1.90972	1.90972	1.90972
				Clinical Officer		29.1667	8.33333	29.1667	8.33333	29.1667	8.33333	33.7683	16.5808	33.7683	16.5808	33.7683	16.5808	34.6802	16.928	34.6802	16.928	34.6802	16.928	35.5921	17.2752	35.5921	17.2752	35.5921	17.2752	36.504	17.6224	36.504	17.6224	36.504	17.6224	35.2887	13.7591	35.2887	13.7591	35.2887
				Nurse		45.4167	25	41.6667	25	41.6667	25	41.6831	22.5877	37.5164	22.5877	37.5164	22.5877	42.1601	17.5877	36.2829	17.5877	36.2829	17.5877	42.6371	12.5877	35.0493	12.5877	35.0493	12.5877	43.114	7.58772	33.8158	7.58772	33.8158	7.58772	45.7182	2.54386	34.2928	2.54386	34.2928
				Pharmacist		79.5833	41.6667	79.1667	41.6667	79.1667	41.6667	79.1667	46.6338	78.75	46.6338	78.75	46.6338	77.4561	40.5921	77.0395	40.5921	77.0395	40.5921	75.7456	34.5504	75.3289	34.5504	75.3289	34.5504	74.0351	28.5088	73.6184	28.5088	73.6184	28.5088	71.9079	18.2127	71.4912	18.2127	71.4912
				Triage Staff/Technician		82.9167	41.6667	79.1667	41.6667	79.1667	41.6667	82.9167	46.6338	78.75	46.6338	78.75	46.6338	82.9167	40.5921	77.0395	40.5921	77.0395	40.5921	82.9167	34.5504	75.3289	34.5504	75.3289	34.5504	82.9167	28.5088	73.6184	28.5088	73.6184	28.5088	82.9167	18.2127	71.4912	18.2127	71.4912
				Physician			9.16667	8.33333	8.33333	8.33333	8.33333	8.33333	8.29861	7.46528	7.46528	7.46528	7.46528	7.46528	6.90972	6.07639	6.07639	6.07639	6.07639	6.07639	5.52083	4.6875	4.6875	4.6875	4.6875	4.6875	4.13194	3.29861	3.29861	3.29861	3.29861	3.29861	2.74306	1.90972	1.90972	1.90972
				Clinical Officer			29.1667	8.33333	29.1667	8.33333	29.1667	8.33333	33.7683	16.5808	33.7683	16.5808	33.7683	16.5808	34.6802	16.928	34.6802	16.928	34.6802	16.928	35.5921	17.2752	35.5921	17.2752	35.5921	17.2752	36.504	17.6224	36.504	17.6224	36.504	17.6224	35.2887	13.7591	35.2887	13.7591
				Nurse			45.4167	25	41.6667	25	41.6667	25	41.6831	22.5877	37.5164	22.5877	37.5164	22.5877	42.1601	17.5877	36.2829	17.5877	36.2829	17.5877	42.6371	12.5877	35.0493	12.5877	35.0493	12.5877	43.114	7.58772	33.8158	7.58772	33.8158	7.58772	45.7182	2.54386	34.2928	2.54386
				Pharmacist			79.5833	41.6667	79.1667	41.6667	79.1667	41.6667	79.1667	46.6338	78.75	46.6338	78.75	46.6338	77.4561	40.5921	77.0395	40.5921	77.0395	40.5921	75.7456	34.5504	75.3289	34.5504	75.3289	34.5504	74.0351	28.5088	73.6184	28.5088	73.6184	28.5088	71.9079	18.2127	71.4912	18.2127
				Triage Staff/Technician			82.9167	41.6667	79.1667	41.6667	79.1667	41.6667	82.9167	46.6338	78.75	46.6338	78.75	46.6338	82.9167	40.5921	77.0395	40.5921	77.0395	40.5921	82.9167	34.5504	75.3289	34.5504	75.3289	34.5504	82.9167	28.5088	73.6184	28.5088	73.6184	28.5088	82.9167	18.2127	71.4912	18.2127
				Physician				9.16667	8.33333	8.33333	8.33333	8.33333	8.33333	8.29861	7.46528	7.46528	7.46528	7.46528	7.46528	6.90972	6.07639	6.07639	6.07639	6.07639	6.07639	5.52083	4.6875	4.6875	4.6875	4.6875	4.6875	4.13194	3.29861	3.29861	3.29861	3.29861	3.29861	2.74306	1.90972	1.90972
				Clinical Officer				29.1667	8.33333	29.1667	8.33333	29.1667	8.33333	33.7683	16.5808	33.7683	16.5808	33.7683	16.5808	34.6802	16.928	34.6802	16.928	34.6802	16.928	35.5921	17.2752	35.5921	17.2752	35.5921	17.2752	36.504	17.6224	36.504	17.6224	36.504	17.6224	35.2887	13.7591	35.2887
				Nurse				45.4167	25	41.6667	25	41.6667	25	41.6831	22.5877	37.5164	22.5877	37.5164	22.5877	42.1601	17.5877	36.2829	17.5877	36.2829	17.5877	42.6371	12.5877	35.0493	12.5877	35.0493	12.5877	43.114	7.58772	33.8158	7.58772	33.8158	7.58772	45.7182	2.54386	34.2928
				Pharmacist				79.5833	41.6667	79.1667	41.6667	79.1667	41.6667	79.1667	46.6338	78.75	46.6338	78.75	46.6338	77.4561	40.5921	77.0395	40.5921	77.0395	40.5921	75.7456	34.5504	75.3289	34.5504	75.3289	34.5504	74.0351	28.5088	73.6184	28.5088	73.6184	28.5088	71.9079	18.2127	71.4912
				Triage Staff/Technician				82.9167	41.6667	79.1667	41.6667	79.1667	41.6667	82.9167	46.6338	78.75	46.6338	78.75	46.6338	82.9167	40.5921	77.0395	40.5921	77.0395	40.5921	82.9167	34.5504	75.3289	34.5504	75.3289	34.5504	82.9167	28.5088	73.6184	28.5088	73.6184	28.5088	82.9167	18.2127	71.4912
				Physician					9.16667	8.33333	8.33333	8.33333	8.33333	8.33333	8.29861	7.46528	7.46528	7.46528	7.46528	7.46528	6.90972	6.07639	6.07639	6.07639	6.07639	6.07639	5.52083	4.6875	4.6875	4.6875	4.6875	4.6875	4.13194	3.29861	3.29861	3.29861	3.29861	3.29861	2.74306	1.90972
				Clinical Officer					29.1667	8.33333	29.1667	8.33333	29.1667	8.33333	33.7683	16.5808	33.7683	16.5808	33.7683	16.5808	34.6802	16.928	34.6802	16.928	34.6802	16.928	35.5921	17.2752	35.5921	17.2752	35.5921	17.2752	36.504	17.6224	36.504	17.6224	36.504	17.6224	35.2887	13.7591
				Nurse					45.4167	25	41.6667	25	41.6667	25	41.6831	22.5877	37.5164	22.5877	37.5164	22.5877	42.1601	17.5877	36.2829	17.5877	36.2829	17.5877	42.6371	12.5877	35.0493	12.5877	35.0493	12.5877	43.114	7.58772	33.8158	7.58772	33.8158	7.58772	45.7182	2.54386
				Pharmacist					79.5833	41.6667	79.1667	41.6667	79.1667	41.6667	79.1667	46.6338	78.75	46.6338	78.75	46.6338	77.4561	40.5921	77.0395	40.5921	77.0395	40.5921	75.7456	34.5504	75.3289	34.5504	75.3289	34.5504	74.0351	28.5088	73.6184	28.5088	73.6184	28.5088	71.9079	18.2127
				Triage Staff/Technician					82.9167	41.6667	79.1667	41.6667	79.1667	41.6667	82.9167	46.6338	78.75	46.6338	78.75	46.6338	82.9167	40.5921	77.0395	40.5921	77.0395	40.5921	82.9167	34.5504	75.3289	34.5504	75.3289	34.5504	82.9167	28.5088	73.6184	28.5088	73.6184	28.5088	82.9167	18.2127
				Physician						9.16667	8.33333	8.33333	8.33333	8.33333	8.33333	8.29861	7.46528	7.46528	7.46528	7.46528	7.46528	6.90972	6.07639	6.07639	6.07639	6.07639	6.07639	5.52083	4.6875	4.6875	4.6875	4.6875	4.6875	4.13194	3.29861	3.29861	3.29861	3.29861	3.29861	2.74306
				Clinical Officer						29.1667	8.33333	29.1667	8.33333	29.1667	8.33333	33.7683	16.5808	33.7683	16.5808	33.7683	16.5808	34.6802	16.928	34.6802	16.928	34.6802	16.928	35.5921	17.2752	35.5921	17.2752	35.5921	17.2752	36.504	17.6224	36.504	17.6224	36.504	17.6224	35.2887
				Nurse						45.4167	25	41.6667	25	41.6667	25	41.6831	22.5877	37.5164	22.5877	37.5164	22.5877	42.1601	17.5877	36.2829	17.5877	36.2829	17.5877	42.6371	12.5877	35.0493	12.5877	35.0493	12.5877	43.114	7.58772	33.8158	7.58772	33.8158	7.58772	45.7182
				Pharmacist						79.5833	41.6667	79.1667	41.6667	79.1667	41.6667	79.1667	46.6338	78.75	46.6338	78.75	46.6338	77.4561	40.5921	77.0395	40.5921	77.0395	40.5921	75.7456	34.5504	75.3289	34.5504	75.3289	34.5504	74.0351	28.5088	73.6184	28.5088	73.6184	28.5088	71.9079
				Triage Staff/Technician						82.9167	41.6667	79.1667	41.6667	79.1667	41.6667	82.9167	46.6338	78.75	46.6338	78.75	46.6338	82.9167	40.5921	77.0395	40.5921	77.0395	40.5921	82.9167	34.5504	75.3289	34.5504	75.3289	34.5504	82.9167	28.5088	73.6184	28.5088	73.6184	28.5088	82.9167
				Physician							9.16667	8.33333	8.33333	8.33333	8.33333	8.33333	8.29861	7.46528	7.46528	7.46528	7.46528	7.46528	6.90972	6.07639	6.07639	6.07639	6.07639	6.07639	5.52083	4.6875	4.6875	4.6875	4.6875	4.6875	4.13194	3.29861	3.29861	3.29861	3.29861	3.29861
				Clinical Officer							29.1667	8.33333	29.1667	8.33333	29.1667	8.33333	33.7683	16.5808	33.7683	16.5808	33.7683	16.5808	34.6802	16.928	34.6802	16.928	34.6802	16.928	35.5921	17.2752	35.5921	17.2752	35.5921	17.2752	36.504	17.6224	36.504	17.6224	36.504	17.6224
				Nurse							45.4167	25	41.6667	25	41.6667	25	41.6831	22.5877	37.5164	22.5877	37.5164	22.5877	42.1601	17.5877	36.2829	17.5877	36.2829	17.5877	42.6371	12.5877	35.0493	12.5877	35.0493	12.5877	43.114	7.58772	33.8158	7.58772	33.8158	7.58772
				Pharmacist							79.5833	41.6667	79.1667	41.6667	79.1667	41.6667	79.1667	46.6338	78.75	46.6338	78.75	46.6338	77.4561	40.5921	77.0395	40.5921	77.0395	40.5921	75.7456	34.5504	75.3289	34.5504	75.3289	34.5504	74.0351	28.5088	73.6184	28.5088	73.6184	28.5088
				Triage Staff/Technician							82.9167	41.6667	79.1667	41.6667	79.1667	41.6667	82.9167	46.6338	78.75	46.6338	78.75	46.6338	82.9167	40.5921	77.0395	40.5921	77.0395	40.5921	82.9167	34.5504	75.3289	34.5504	75.3289	34.5504	82.9167	28.5088	73.6184	28.5088	73.6184	28.5088
				Physician								9.16667	8.33333	8.33333	8.33333	8.33333	8.33333	8.29861	7.46528	7.46528	7.46528	7.46528	7.46528	6.90972	6.07639	6.07639	6.07639	6.07639	6.07639	5.52083	4.6875	4.6875	4.6875	4.6875	4.6875	4.13194	3.29861	3.29861	3.29861	3.29861
				Clinical Officer								29.1667	8.33333	29.1667	8.33333	29.1667	8.33333	33.7683	16.5808	33.7683	16.5808	33.7683	16.5808	34.6802	16.928	34.6802	16.928	34.6802	16.928	35.5921	17.2752	35.5921	17.2752	35.5921	17.2752	36.504	17.6224	36.504	17.6224	36.504
				Nurse								45.4167	25	41.6667	25	41.6667	25	41.6831	22.5877	37.5164	22.5877	37.5164	22.5877	42.1601	17.5877	36.2829	17.5877	36.2829	17.5877	42.6371	12.5877	35.0493	12.5877	35.0493	12.5877	43.114	7.58772	33.8158	7.58772	33.8158
				Pharmacist								79.5833	41.6667	79.1667	41.6667	79.1667	41.6667	79.1667	46.6338	78.75	46.6338	78.75	46.6338	77.4561	40.5921	77.0395	40.5921	77.0395	40.5921	75.7456	34.5504	75.3289	34.5504	75.3289	34.5504	74.0351	28.5088	73.6184	28.5088	73.6184
				Triage Staff/Technician								82.9167	41.6667	79.1667	41.6667	79.1667	41.6667	82.9167	46.6338	78.75	46.6338	78.75	46.6338	82.9167	40.5921	77.0395	40.5921	77.0395	40.5921	82.9167	34.5504	75.3289	34.5504	75.3289	34.5504	82.9167	28.5088	73.6184	28.5088	73.6184
				Physician									9.16667	8.33333	8.33333	8.33333	8.33333	8.33333	8.29861	7.46528	7.46528	7.46528	7.46528	7.46528	6.90972	6.07639	6.07639	6.07639	6.07639	6.07639	5.52083	4.6875	4.6875	4.6875	4.6875	4.6875	4.13194	3.29861	3.29861	3.29861
				Clinical Officer									29.1667	8.33333	29.1667	8.33333	29.1667	8.33333	33.7683	16.5808	33.7683	16.5808	33.7683	16.5808	34.6802	16.928	34.6802	16.928	34.6802	16.928	35.5921	17.2752	35.5921	17.2752	35.5921	17.2752	36.504	17.6224	36.504	17.6224
				Nurse									45.4167	25	41.6667	25	41.6667	25	41.6831	22.5877	37.5164	22.5877	37.5164	22.5877	42.1601	17.5877	36.2829	17.5877	36.2829	17.5877	42.6371	12.5877	35.0493	12.5877	35.0493	12.5877	43.114	7.58772	33.8158	7.58772
				Pharmacist									79.5833	41.6667	79.1667	41.6667	79.1667	41.6667	79.1667	46.6338	78.75	46.6338	78.75	46.6338	77.4561	40.5921	77.0395	40.5921	77.0395	40.5921	75.7456	34.5504	75.3289	34.5504	75.3289	34.5504	74.0351	28.5088	73.6184	28.5088
				Triage Staff/Technician									82.9167	41.6667	79.1667	41.6667	79.1667	41.6667	82.9167	46.6338	78.75	46.6338	78.75	46.6338	82.9167	40.5921	77.0395	40.5921	77.0395	40.5921	82.9167	34.5504	75.3289	34.5504	75.3289	34.5504	82.9167	28.5088	73.6184	28.5088
				Physician										9.16667	8.33333	8.33333	8.33333	8.33333	8.33333	8.29861	7.46528	7.46528	7.46528	7.46528	7.46528	6.90972	6.07639	6.07639	6.07639	6.07639	6.07639	5.52083	4.6875	4.6875	4.6875	4.6875	4.6875	4.13194	3.29861	3.29861
				Clinical Officer										29.1667	8.33333	29.1667	8.33333	29.1667	8.33333	33.7683	16.5808	33.7683	16.5808	33.7683	16.5808	34.6802	16.928	34.6802	16.928	34.6802	16.928	35.5921	17.2752	35.5921	17.2752	35.5921	17.2752	36.504	17.6224	36.504
				Nurse										45.4167	25	41.6667	25	41.6667	25	41.6831	22.5877	37.5164	22.5877	37.5164	22.5877	42.1601	17.5877	36.2829	17.5877	36.2829	17.5877	42.6371	12.5877	35.0493	12.5877	35.0493	12.5877	43.114	7.58772	33.8158
				Pharmacist										79.5833	41.6667	79.1667	41.6667	79.1667	41.6667	79.1667	46.6338	78.75	46.6338	78.75	46.6338	77.4561	40.5921	77.0395	40.5921	77.0395	40.5921	75.7456	34.5504	75.3289	34.5504	75.3289	34.5504	74.0351	28.5088	73.6184
				Triage Staff/Technician										82.9167	41.6667	79.1667	41.6667	79.1667	41.6667	82.9167	46.6338	78.75	46.6338	78.75	46.6338	82.9167	40.5921	77.0395	40.5921	77.0395	40.5921	82.9167	34.5504	75.3289	34.5504	75.3289	34.5504	82.9167	28.5088	73.6184
				Physician											9.16667	8.33333	8.33333	8.33333	8.33333	8.33333	8.29861	7.46528	7.46528	7.46528	7.46528	7.46528	6.90972	6.07639	6.07639	6.07639	6.07639	6.07639	5.52083	4.6875	4.6875	4.6875	4.6875	4.6875	4.13194	3.29861
				Clinical Officer											29.1667	8.33333	29.1667	8.33333	29.1667	8.33333	33.7683	16.5808	33.7683	16.5808	33.7683	16.5808	34.6802	16.928	34.6802	16.928	34.6802	16.928	35.5921	17.2752	35.5921	17.2752	35.5921	17.2752	36.504	17.6224
				Nurse											45.4167	25	41.6667	25	41.6667	25	41.6831	22.5877	37.5164	22.5877	37.5164	22.5877	42.1601	17.5877	36.2829	17.5877	36.2829	17.5877	42.6371	12.5877	35.0493	12.5877	35.0493	12.5877	43.114	7.58772
				Pharmacist											79.5833	41.6667	79.1667	41.6667	79.1667	41.6667	79.1667	46.6338	78.75	46.6338	78.75	46.6338	77.4561	40.5921	77.0395	40.5921	77.0395	40.5921	75.7456	34.5504	75.3289	34.5504	75.3289	34.5504	74.0351	28.5088
				Triage Staff/Technician											82.9167	41.6667	79.1667	41.6667	79.1667	41.6667	82.9167	46.6338	78.75	46.6338	78.75	46.6338	82.9167	40.5921	77.0395	40.5921	77.0395	40.5921	82.9167	34.5504	75.3289	34.5504	75.3289	34.5504	82.9167	28.5088
				Physician												9.16667	8.33333	8.33333	8.33333	8.33333	8.33333	8.29861	7.46528	7.46528	7.46528	7.46528	7.46528	6.90972	6.07639	6.07639	6.07639	6.07639	6.07639	5.52083	4.6875	4.6875	4.6875	4.6875	4.6875	4.13194
				Clinical Officer												29.1667	8.33333	29.1667	8.33333	29.1667	8.33333	33.7683	16.5808	33.7683	16.5808	33.7683	16.5808	34.6802	16.928	34.6802	16.928	34.6802	16.928	35.5921	17.2752	35.5921	17.2752	35.5921	17.2752	36.504
				Nurse												45.4167	25	41.6667	25	41.6667	25	41.6831	22.5877	37.5164	22.5877	37.5164	22.5877	42.1601	17.5877	36.2829	17.5877	36.2829	17.5877	42.6371	12.5877	35.0493	12.5877	35.0493	12.5877	43.114
				Pharmacist												79.5833	41.6667	79.1667	41.6667	79.1667	41.6667	79.1667	46.6338	78.75	46.6338	78.75	46.6338	77.4561	40.5921	77.0395	40.5921	77.0395	40.5921	75.7456	34.5504	75.3289	34.5504	75.3289	34.5504	74.0351
				Triage Staff/Technician												82.9167	41.6667	79.1667	41.6667	79.1667	41.6667	82.9167	46.6338	78.75	46.6338	78.75	46.6338	82.9167	40.5921	77.0395	40.5921	77.0395	40.5921	82.9167	34.5504	75.3289	34.5504	75.3289	34.5504	82.9167
				Physician													18.3333	16.6667	16.6667	16.6667	16.6667	16.6667	16.5972	14.9306	14.9306	14.9306	14.9306	14.9306	13.8194	12.1528	12.1528	12.1528	12.1528	12.1528	11.0417	9.375	9.375	9.375	9.375	9.375
				Clinical Officer													58.3333	16.6667	58.3333	16.6667	58.3333	16.6667	67.5365	33.1615	67.5365	33.1615	67.5365	33.1615	69.3604	33.856	69.3604	33.856	69.3604	33.856	71.1842	34.5504	71.1842	34.5504	71.1842	34.5504
				Nurse													90.8333	50	83.3333	50	83.3333	50	83.3662	45.1754	75.0329	45.1754	75.0329	45.1754	84.3202	35.1754	72.5658	35.1754	72.5658	35.1754	85.2741	25.1754	70.0987	25.1754	70.0987	25.1754
				Pharmacist													159.167	83.3333	158.333	83.3333	158.333	83.3333	158.333	93.2675	157.5	93.2675	157.5	93.2675	154.912	81.1842	154.079	81.1842	154.079	81.1842	151.491	69.1009	150.658	69.1009	150.658	69.1009
				Triage Staff/Technician													165.833	83.3333	158.333	83.3333	158.333	83.3333	165.833	93.2675	157.5	93.2675	157.5	93.2675	165.833	81.1842	154.079	81.1842	154.079	81.1842	165.833	69.1009	150.658	69.1009	150.658	69.1009
				Physician														18.3333	16.6667	16.6667	16.6667	16.6667	16.6667	16.5972	14.9306	14.9306	14.9306	14.9306	14.9306	13.8194	12.1528	12.1528	12.1528	12.1528	12.1528	11.0417	9.375	9.375	9.375	9.375
				Clinical Officer														58.3333	16.6667	58.3333	16.6667	58.3333	16.6667	67.5365	33.1615	67.5365	33.1615	67.5365	33.1615	69.3604	33.856	69.3604	33.856	69.3604	33.856	71.1842	34.5504	71.1842	34.5504	71.1842
				Nurse														90.8333	50	83.3333	50	83.3333	50	83.3662	45.1754	75.0329	45.1754	75.0329	45.1754	84.3202	35.1754	72.5658	35.1754	72.5658	35.1754	85.2741	25.1754	70.0987	25.1754	70.0987
				Pharmacist														159.167	83.3333	158.333	83.3333	158.333	83.3333	158.333	93.2675	157.5	93.2675	157.5	93.2675	154.912	81.1842	154.079	81.1842	154.079	81.1842	151.491	69.1009	150.658	69.1009	150.658
				Triage Staff/Technician														165.833	83.3333	158.333	83.3333	158.333	83.3333	165.833	93.2675	157.5	93.2675	157.5	93.2675	165.833	81.1842	154.079	81.1842	154.079	81.1842	165.833	69.1009	150.658	69.1009	150.658
				Physician															18.3333	16.6667	16.6667	16.6667	16.6667	16.6667	16.5972	14.9306	14.9306	14.9306	14.9306	14.9306	13.8194	12.1528	12.1528	12.1528	12.1528	12.1528	11.0417	9.375	9.375	9.375
				Clinical Officer															58.3333	16.6667	58.3333	16.6667	58.3333	16.6667	67.5365	33.1615	67.5365	33.1615	67.5365	33.1615	69.3604	33.856	69.3604	33.856	69.3604	33.856	71.1842	34.5504	71.1842	34.5504
				Nurse															90.8333	50	83.3333	50	83.3333	50	83.3662	45.1754	75.0329	45.1754	75.0329	45.1754	84.3202	35.1754	72.5658	35.1754	72.5658	35.1754	85.2741	25.1754	70.0987	25.1754
				Pharmacist															159.167	83.3333	158.333	83.3333	158.333	83.3333	158.333	93.2675	157.5	93.2675	157.5	93.2675	154.912	81.1842	154.079	81.1842	154.079	81.1842	151.491	69.1009	150.658	69.1009
				Triage Staff/Technician															165.833	83.3333	158.333	83.3333	158.333	83.3333	165.833	93.2675	157.5	93.2675	157.5	93.2675	165.833	81.1842	154.079	81.1842	154.079	81.1842	165.833	69.1009	150.658	69.1009
				Physician																18.3333	16.6667	16.6667	16.6667	16.6667	16.6667	16.5972	14.9306	14.9306	14.9306	14.9306	14.9306	13.8194	12.1528	12.1528	12.1528	12.1528	12.1528	11.0417	9.375	9.375
				Clinical Officer																58.3333	16.6667	58.3333	16.6667	58.3333	16.6667	67.5365	33.1615	67.5365	33.1615	67.5365	33.1615	69.3604	33.856	69.3604	33.856	69.3604	33.856	71.1842	34.5504	71.1842
				Nurse																90.8333	50	83.3333	50	83.3333	50	83.3662	45.1754	75.0329	45.1754	75.0329	45.1754	84.3202	35.1754	72.5658	35.1754	72.5658	35.1754	85.2741	25.1754	70.0987
				Pharmacist																159.167	83.3333	158.333	83.3333	158.333	83.3333	158.333	93.2675	157.5	93.2675	157.5	93.2675	154.912	81.1842	154.079	81.1842	154.079	81.1842	151.491	69.1009	150.658
				Triage Staff/Technician																165.833	83.3333	158.333	83.3333	158.333	83.3333	165.833	93.2675	157.5	93.2675	157.5	93.2675	165.833	81.1842	154.079	81.1842	154.079	81.1842	165.833	69.1009	150.658
				Physician																	18.3333	16.6667	16.6667	16.6667	16.6667	16.6667	16.5972	14.9306	14.9306	14.9306	14.9306	14.9306	13.8194	12.1528	12.1528	12.1528	12.1528	12.1528	11.0417	9.375
				Clinical Officer																	58.3333	16.6667	58.3333	16.6667	58.3333	16.6667	67.5365	33.1615	67.5365	33.1615	67.5365	33.1615	69.3604	33.856	69.3604	33.856	69.3604	33.856	71.1842	34.5504
				Nurse																	90.8333	50	83.3333	50	83.3333	50	83.3662	45.1754	75.0329	45.1754	75.0329	45.1754	84.3202	35.1754	72.5658	35.1754	72.5658	35.1754	85.2741	25.1754
				Pharmacist																	159.167	83.3333	158.333	83.3333	158.333	83.3333	158.333	93.2675	157.5	93.2675	157.5	93.2675	154.912	81.1842	154.079	81.1842	154.079	81.1842	151.491	69.1009
				Triage Staff/Technician																	165.833	83.3333	158.333	83.3333	158.333	83.3333	165.833	93.2675	157.5	93.2675	157.5	93.2675	165.833	81.1842	154.079	81.1842	154.079	81.1842	165.833	69.1009
				Physician																		18.3333	16.6667	16.6667	16.6667	16.6667	16.6667	16.5972	14.9306	14.9306	14.9306	14.9306	14.9306	13.8194	12.1528	12.1528	12.1528	12.1528	12.1528	11.0417
				Clinical Officer																		58.3333	16.6667	58.3333	16.6667	58.3333	16.6667	67.5365	33.1615	67.5365	33.1615	67.5365	33.1615	69.3604	33.856	69.3604	33.856	69.3604	33.856	71.1842
				Nurse																		90.8333	50	83.3333	50	83.3333	50	83.3662	45.1754	75.0329	45.1754	75.0329	45.1754	84.3202	35.1754	72.5658	35.1754	72.5658	35.1754	85.2741
				Pharmacist																		159.167	83.3333	158.333	83.3333	158.333	83.3333	158.333	93.2675	157.5	93.2675	157.5	93.2675	154.912	81.1842	154.079	81.1842	154.079	81.1842	151.491
				Triage Staff/Technician																		165.833	83.3333	158.333	83.3333	158.333	83.3333	165.833	93.2675	157.5	93.2675	157.5	93.2675	165.833	81.1842	154.079	81.1842	154.079	81.1842	165.833
				Physician																			18.3333	16.6667	16.6667	16.6667	16.6667	16.6667	16.5972	14.9306	14.9306	14.9306	14.9306	14.9306	13.8194	12.1528	12.1528	12.1528	12.1528	12.1528
				Clinical Officer																			58.3333	16.6667	58.3333	16.6667	58.3333	16.6667	67.5365	33.1615	67.5365	33.1615	67.5365	33.1615	69.3604	33.856	69.3604	33.856	69.3604	33.856
				Nurse																			90.8333	50	83.3333	50	83.3333	50	83.3662	45.1754	75.0329	45.1754	75.0329	45.1754	84.3202	35.1754	72.5658	35.1754	72.5658	35.1754
				Pharmacist																			159.167	83.3333	158.333	83.3333	158.333	83.3333	158.333	93.2675	157.5	93.2675	157.5	93.2675	154.912	81.1842	154.079	81.1842	154.079	81.1842
				Triage Staff/Technician																			165.833	83.3333	158.333	83.3333	158.333	83.3333	165.833	93.2675	157.5	93.2675	157.5	93.2675	165.833	81.1842	154.079	81.1842	154.079	81.1842
				Physician																				18.3333	16.6667	16.6667	16.6667	16.6667	16.6667	16.5972	14.9306	14.9306	14.9306	14.9306	14.9306	13.8194	12.1528	12.1528	12.1528	12.1528
				Clinical Officer																				58.3333	16.6667	58.3333	16.6667	58.3333	16.6667	67.5365	33.1615	67.5365	33.1615	67.5365	33.1615	69.3604	33.856	69.3604	33.856	69.3604
				Nurse																				90.8333	50	83.3333	50	83.3333	50	83.3662	45.1754	75.0329	45.1754	75.0329	45.1754	84.3202	35.1754	72.5658	35.1754	72.5658
				Pharmacist																				159.167	83.3333	158.333	83.3333	158.333	83.3333	158.333	93.2675	157.5	93.2675	157.5	93.2675	154.912	81.1842	154.079	81.1842	154.079
				Triage Staff/Technician																				165.833	83.3333	158.333	83.3333	158.333	83.3333	165.833	93.2675	157.5	93.2675	157.5	93.2675	165.833	81.1842	154.079	81.1842	154.079
				Physician																					18.3333	16.6667	16.6667	16.6667	16.6667	16.6667	16.5972	14.9306	14.9306	14.9306	14.9306	14.9306	13.8194	12.1528	12.1528	12.1528
				Clinical Officer																					58.3333	16.6667	58.3333	16.6667	58.3333	16.6667	67.5365	33.1615	67.5365	33.1615	67.5365	33.1615	69.3604	33.856	69.3604	33.856
				Nurse																					90.8333	50	83.3333	50	83.3333	50	83.3662	45.1754	75.0329	45.1754	75.0329	45.1754	84.3202	35.1754	72.5658	35.1754
				Pharmacist																					159.167	83.3333	158.333	83.3333	158.333	83.3333	158.333	93.2675	157.5	93.2675	157.5	93.2675	154.912	81.1842	154.079	81.1842
				Triage Staff/Technician																					165.833	83.3333	158.333	83.3333	158.333	83.3333	165.833	93.2675	157.5	93.2675	157.5	93.2675	165.833	81.1842	154.079	81.1842
				Physician																						18.3333	16.6667	16.6667	16.6667	16.6667	16.6667	16.5972	14.9306	14.9306	14.9306	14.9306	14.9306	13.8194	12.1528	12.1528
				Clinical Officer																						58.3333	16.6667	58.3333	16.6667	58.3333	16.6667	67.5365	33.1615	67.5365	33.1615	67.5365	33.1615	69.3604	33.856	69.3604
				Nurse																						90.8333	50	83.3333	50	83.3333	50	83.3662	45.1754	75.0329	45.1754	75.0329	45.1754	84.3202	35.1754	72.5658
				Pharmacist																						159.167	83.3333	158.333	83.3333	158.333	83.3333	158.333	93.2675	157.5	93.2675	157.5	93.2675	154.912	81.1842	154.079
				Triage Staff/Technician																						165.833	83.3333	158.333	83.3333	158.333	83.3333	165.833	93.2675	157.5	93.2675	157.5	93.2675	165.833	81.1842	154.079
				Physician																							18.3333	16.6667	16.6667	16.6667	16.6667	16.6667	16.5972	14.9306	14.9306	14.9306	14.9306	14.9306	13.8194	12.1528
				Clinical Officer																							58.3333	16.6667	58.3333	16.6667	58.3333	16.6667	67.5365	33.1615	67.5365	33.1615	67.5365	33.1615	69.3604	33.856
				Nurse																							90.8333	50	83.3333	50	83.3333	50	83.3662	45.1754	75.0329	45.1754	75.0329	45.1754	84.3202	35.1754
				Pharmacist																							159.167	83.3333	158.333	83.3333	158.333	83.3333	158.333	93.2675	157.5	93.2675	157.5	93.2675	154.912	81.1842
				Triage Staff/Technician																							165.833	83.3333	158.333	83.3333	158.333	83.3333	165.833	93.2675	157.5	93.2675	157.5	93.2675	165.833	81.1842
				Physician																								18.3333	16.6667	16.6667	16.6667	16.6667	16.6667	16.5972	14.9306	14.9306	14.9306	14.9306	14.9306	13.8194
				Clinical Officer																								58.3333	16.6667	58.3333	16.6667	58.3333	16.6667	67.5365	33.1615	67.5365	33.1615	67.5365	33.1615	69.3604
				Nurse																								90.8333	50	83.3333	50	83.3333	50	83.3662	45.1754	75.0329	45.1754	75.0329	45.1754	84.3202
				Pharmacist																								159.167	83.3333	158.333	83.3333	158.333	83.3333	158.333	93.2675	157.5	93.2675	157.5	93.2675	154.912
				Triage Staff/Technician																								165.833	83.3333	158.333	83.3333	158.333	83.3333	165.833	93.2675	157.5	93.2675	157.5	93.2675	165.833
				Physician																									36.6667	33.3333	33.3333	33.3333	33.3333	33.3333	33.1944	29.8611	29.8611	29.8611	29.8611	29.8611
				Clinical Officer																									116.667	33.3333	116.667	33.3333	116.667	33.3333	135.073	66.3231	135.073	66.3231	135.073	66.3231
				Nurse																									181.667	100	166.667	100	166.667	100	166.732	90.3509	150.066	90.3509	150.066	90.3509
				Pharmacist																									318.333	166.667	316.667	166.667	316.667	166.667	316.667	186.535	315	186.535	315	186.535
				Triage Staff/Technician																									331.667	166.667	316.667	166.667	316.667	166.667	331.667	186.535	315	186.535	315	186.535
				Physician																										36.6667	33.3333	33.3333	33.3333	33.3333	33.3333	33.1944	29.8611	29.8611	29.8611	29.8611
				Clinical Officer																										116.667	33.3333	116.667	33.3333	116.667	33.3333	135.073	66.3231	135.073	66.3231	135.073
				Nurse																										181.667	100	166.667	100	166.667	100	166.732	90.3509	150.066	90.3509	150.066
				Pharmacist																										318.333	166.667	316.667	166.667	316.667	166.667	316.667	186.535	315	186.535	315
				Triage Staff/Technician																										331.667	166.667	316.667	166.667	316.667	166.667	331.667	186.535	315	186.535	315
				Physician																											36.6667	33.3333	33.3333	33.3333	33.3333	33.3333	33.1944	29.8611	29.8611	29.8611
				Clinical Officer																											116.667	33.3333	116.667	33.3333	116.667	33.3333	135.073	66.3231	135.073	66.3231
				Nurse																											181.667	100	166.667	100	166.667	100	166.732	90.3509	150.066	90.3509
				Pharmacist																											318.333	166.667	316.667	166.667	316.667	166.667	316.667	186.535	315	186.535
				Triage Staff/Technician																											331.667	166.667	316.667	166.667	316.667	166.667	331.667	186.535	315	186.535
				Physician																												36.6667	33.3333	33.3333	33.3333	33.3333	33.3333	33.1944	29.8611	29.8611
				Clinical Officer																												116.667	33.3333	116.667	33.3333	116.667	33.3333	135.073	66.3231	135.073
				Nurse																												181.667	100	166.667	100	166.667	100	166.732	90.3509	150.066
				Pharmacist																												318.333	166.667	316.667	166.667	316.667	166.667	316.667	186.535	315
				Triage Staff/Technician																												331.667	166.667	316.667	166.667	316.667	166.667	331.667	186.535	315
				Physician																													36.6667	33.3333	33.3333	33.3333	33.3333	33.3333	33.1944	29.8611
				Clinical Officer																													116.667	33.3333	116.667	33.3333	116.667	33.3333	135.073	66.3231
				Nurse																													181.667	100	166.667	100	166.667	100	166.732	90.3509
				Pharmacist																													318.333	166.667	316.667	166.667	316.667	166.667	316.667	186.535
				Triage Staff/Technician																													331.667	166.667	316.667	166.667	316.667	166.667	331.667	186.535
				Physician																														36.6667	33.3333	33.3333	33.3333	33.3333	33.3333	33.1944
				Clinical Officer																														116.667	33.3333	116.667	33.3333	116.667	33.3333	135.073
				Nurse																														181.667	100	166.667	100	166.667	100	166.732
				Pharmacist																														318.333	166.667	316.667	166.667	316.667	166.667	316.667
				Triage Staff/Technician																														331.667	166.667	316.667	166.667	316.667	166.667	331.667
				Physician																															36.6667	33.3333	33.3333	33.3333	33.3333	33.3333
				Clinical Officer																															116.667	33.3333	116.667	33.3333	116.667	33.3333
				Nurse																															181.667	100	166.667	100	166.667	100
				Pharmacist																															318.333	166.667	316.667	166.667	316.667	166.667
				Triage Staff/Technician																															331.667	166.667	316.667	166.667	316.667	166.667
				Physician																																36.6667	33.3333	33.3333	33.3333	33.3333
				Clinical Officer																																116.667	33.3333	116.667	33.3333	116.667
				Nurse																																181.667	100	166.667	100	166.667
				Pharmacist																																318.333	166.667	316.667	166.667	316.667
				Triage Staff/Technician																																331.667	166.667	316.667	166.667	316.667
				Physician																																	36.6667	33.3333	33.3333	33.3333
				Clinical Officer																																	116.667	33.3333	116.667	33.3333
				Nurse																																	181.667	100	166.667	100
				Pharmacist																																	318.333	166.667	316.667	166.667
				Triage Staff/Technician																																	331.667	166.667	316.667	166.667
				Physician																																		36.6667	33.3333	33.3333
				Clinical Officer																																		116.667	33.3333	116.667
				Nurse																																		181.667	100	166.667
				Pharmacist																																		318.333	166.667	316.667
				Triage Staff/Technician																																		331.667	166.667	316.667
				Physician																																			36.6667	33.3333
				Clinical Officer																																			116.667	33.3333
				Nurse																																			181.667	100
				Pharmacist																																			318.333	166.667
				Triage Staff/Technician																																			331.667	166.667
				Physician																																				36.6667
				Clinical Officer																																				116.667
				Nurse																																				181.667
				Pharmacist																																				318.333
				Triage Staff/Technician																																				331.667
				Physician	9.16667	17.5	25.8333	34.1667	42.5	50.8333	59.1319	66.5972	74.0625	81.5278	88.9931	96.4583	112.535	126.944	141.354	155.764	170.174	184.583	198.403	210.556	222.708	234.861	247.014	259.167	288.542	314.583	340.625	366.667	392.708	418.75	443.611	465.139	486.667	508.194	529.722	551.25
				Clinical Officer	29.1667	37.5	66.6667	75	104.167	112.5	146.268	162.849	196.617	213.198	246.966	263.547	327.394	352.655	416.502	441.764	505.61	530.872	600.232	634.088	703.448	737.304	806.665	840.521	970.038	1021.26	1150.77	1201.99	1331.51	1382.72	1521.14	1585.34	1723.76	1787.95	1926.37	1990.56
				Nurse	45.4167	70.4167	112.083	137.083	178.75	203.75	245.433	268.021	305.537	328.125	365.641	388.229	475.806	518.394	596.343	638.931	716.88	759.468	843.788	878.964	951.53	986.705	1059.27	1094.45	1270.55	1345.73	1499.16	1574.34	1727.77	1802.94	1974.67	2034.97	2179.35	2239.65	2384.03	2444.34
				Pharmacist	79.5833	121.25	200.417	242.083	321.25	362.917	442.083	488.717	567.467	614.101	692.851	739.485	896.524	978.783	1134.99	1217.25	1373.45	1455.71	1610.62	1691.81	1845.89	1927.07	2081.15	2162.34	2472.99	2625.43	2934.42	3086.85	3395.84	3548.28	3854.27	4000.3	4304.62	4450.65	4754.97	4901
				Triage Staff/Technician	82.9167	124.583	203.75	245.417	324.583	366.25	449.167	495.8	574.55	621.184	699.934	746.568	912.401	994.66	1150.87	1233.12	1389.33	1471.59	1637.42	1718.61	1872.69	1953.87	2107.95	2189.13	2520.8	2673.23	2982.23	3134.66	3443.65	3596.09	3927.75	4073.78	4378.1	4524.13	4828.45	4974.48

## Sheet: Clinical Algorithm Final
Assumption: Patients are re-evaluated every 6 months								Starting category	All possible outcomes
Nq6	Enrollment month	1	2	3	4	5	6	Nq6	Nq6 - no change
Nurse, q6 months	HTN Rx month	1	2	3	4	5	6		Nq1 - worsen
	Physician
	Clinical Officer
	Nurse	x
	Pharmacist
	Triage Staff/Technician	x
Nq2	Enrollment month	1	2	3	4	5	6	Nq2	Nq2 - no change
Nurse, q2 months	HTN Rx month	1	2	3	4	5	6		Nq1 - worsen
	Physician								Cq1 - worsen
	Clinical Officer
	Nurse	x		x		x
	Pharmacist	x		x		x
	Triage Staff/Technician	x		x		x
Nq1	Enrollment month	1	2	3	4	5	6	Nq1	Nq6 - improve
Nurse, q1 month	HTN Rx month	1							Nq2 - improve
	Physician								Nq1 - no change
	Clinical Officer								Cq1 - worsen
	Nurse	x	x	x	x	x	x
	Pharmacist	x	x	x	x	x	x
	Triage Staff/Technician	x	x	x	x	x	x
Cq2	Enrollment month	1	2	3	4	5	6	Cq2	Cq2 - no change
CO, q2 months	HTN Rx month	1	2	3	4	5	6		Cq1 - worsen
	Physician
	Clinical Officer	x		x		x
	Nurse
	Pharmacist	x		x		x
	Triage Staff/Technician	x		x		x
Cq1	Enrollment month	1	2	3	4	5	6	Cq1	Nq2 - improve
CO, q1 month	HTN Rx month	1	2	3	4	5	6		Cq2 - improve
	Physician								Cq1 - no change
	Clinical Officer	x	x	x	x	x	x		Pq1 - worsen
	Nurse
	Pharmacist	x	x	x	x	x	x
	Triage Staff/Technician	x	x	x	x	x	x
Pq1	Enrollment month	1	2	3	4	5	6	Pq1	Cq1 - improve
Physician, q1 month	HTN Rx month	1	2	3	4	5	6		Pq1 - no change
	Physician	x	x	x	x	x	x
	Clinical Officer
	Nurse
	Pharmacist	x	x	x	x	x	x
	Triage Staff/Technician	x	x	x	x	x	x
Assumptions:	F/u intervals can stay constant
	F/u intervals can improve (1x)
	F/u intervals can worsen (1x), then improve (1x)
		Month	Month	Month	Month	Month	Month
Starting category	Possible outcomes	1	7	13	19	25	31
Nq6	No change (Nq6)	Nq6	Nq6	Nq6	Nq6	Nq6	Nq6
	Worsen (Nq1) - improve (Nq6)	Nq6	Nq1	Nq6	Nq6	Nq6	Nq6
	Worsen (Nq1) - improve (Nq6)	Nq6	Nq6	Nq1	Nq6	Nq6	Nq6
	Worsen (Nq1) - improve (Nq6)	Nq6	Nq6	Nq6	Nq1	Nq6	Nq6
	Worsen (Nq1) - improve (Nq6)	Nq6	Nq6	Nq6	Nq6	Nq1	Nq6
	Worsen (Nq1) - improve (Nq6)	Nq6	Nq6	Nq6	Nq6	Nq6	Nq1
	Worsen (Nq1) - improve (Nq2)	Nq6	Nq1	Nq2	Nq2	Nq2	Nq2
	Worsen (Nq1) - improve (Nq2)	Nq6	Nq6	Nq1	Nq2	Nq2	Nq2
	Worsen (Nq1) - improve (Nq2)	Nq6	Nq6	Nq6	Nq1	Nq2	Nq2
	Worsen (Nq1) - improve (Nq2)	Nq6	Nq6	Nq6	Nq6	Nq1	Nq2
	Worsen (Nq1) - improve (Nq2)	Nq6	Nq6	Nq6	Nq6	Nq6	Nq1
Nq2	No change (Nq2)	Nq2	Nq2	Nq2	Nq2	Nq2	Nq2
	Worsen (Nq1) - improve (Nq6)	Nq2	Nq1	Nq6	Nq6	Nq6	Nq6
	Worsen (Nq1) - improve (Nq6)	Nq2	Nq2	Nq1	Nq6	Nq6	Nq6
	Worsen (Nq1) - improve (Nq6)	Nq2	Nq2	Nq2	Nq1	Nq6	Nq6
	Worsen (Nq1) - improve (Nq6)	Nq2	Nq2	Nq2	Nq2	Nq1	Nq6
	Worsen (Nq1) - improve (Nq6)	Nq2	Nq2	Nq2	Nq2	Nq2	Nq1
	Worsen (Nq1) - improve (Nq2)	Nq2	Nq1	Nq2	Nq2	Nq2	Nq2
	Worsen (Nq1) - improve (Nq2)	Nq2	Nq2	Nq1	Nq2	Nq2	Nq2
	Worsen (Nq1) - improve (Nq2)	Nq2	Nq2	Nq2	Nq1	Nq2	Nq2
	Worsen (Nq1) - improve (Nq2)	Nq2	Nq2	Nq2	Nq2	Nq1	Nq2
	Worsen (Nq1) - improve (Nq2)	Nq2	Nq2	Nq2	Nq2	Nq2	Nq1
	Worsen (Cq1) - improve (Nq2)	Nq2	Cq1	Nq2	Nq2	Nq2	Nq2
	Worsen (Cq1) - improve (Nq2)	Nq2	Nq2	Cq1	Nq2	Nq2	Nq2
	Worsen (Cq1) - improve (Nq2)	Nq2	Nq2	Nq2	Cq1	Nq2	Nq2
	Worsen (Cq1) - improve (Nq2)	Nq2	Nq2	Nq2	Nq2	Cq1	Nq2
	Worsen (Cq1) - improve (Nq2)	Nq2	Nq2	Nq2	Nq2	Nq2	Cq1
	Worsen (Cq1) - improve (Cq2)	Nq2	Cq1	Cq2	Cq2	Cq2	Cq2
	Worsen (Cq1) - improve (Cq2)	Nq2	Nq2	Cq1	Cq2	Cq2	Cq2
	Worsen (Cq1) - improve (Cq2)	Nq2	Nq2	Nq2	Cq1	Cq2	Cq2
	Worsen (Cq1) - improve (Cq2)	Nq2	Nq2	Nq2	Nq2	Cq1	Cq2
	Worsen (Cq1) - improve (Cq2)	Nq2	Nq2	Nq2	Nq2	Nq2	Cq1
Nq1	No change (Nq1)	Nq1	Nq1	Nq1	Nq1	Nq1	Nq1
	Improve (Nq6)	Nq1	Nq6	Nq6	Nq6	Nq6	Nq6
	Improve (Nq6)	Nq1	Nq1	Nq6	Nq6	Nq6	Nq6
	Improve (Nq6)	Nq1	Nq1	Nq1	Nq6	Nq6	Nq6
	Improve (Nq6)	Nq1	Nq1	Nq1	Nq1	Nq6	Nq6
	Improve (Nq6)	Nq1	Nq1	Nq1	Nq1	Nq1	Nq6
	Improve (Nq2)	Nq1	Nq2	Nq2	Nq2	Nq2	Nq2
	Improve (Nq2)	Nq1	Nq1	Nq2	Nq2	Nq2	Nq2
	Improve (Nq2)	Nq1	Nq1	Nq1	Nq2	Nq2	Nq2
	Improve (Nq2)	Nq1	Nq1	Nq1	Nq1	Nq2	Nq2
	Improve (Nq2)	Nq1	Nq1	Nq1	Nq1	Nq1	Nq2
	Worsen (Cq1) - improve (Nq2)	Nq1	Cq1	Nq2	Nq2	Nq2	Nq2
	Worsen (Cq1) - improve (Nq2)	Nq1	Nq1	Cq1	Nq2	Nq2	Nq2
	Worsen (Cq1) - improve (Nq2)	Nq1	Nq1	Nq1	Cq1	Nq2	Nq2
	Worsen (Cq1) - improve (Nq2)	Nq1	Nq1	Nq1	Nq1	Cq1	Nq2
	Worsen (Cq1) - improve (Nq2)	Nq1	Nq1	Nq1	Nq1	Nq1	Cq1
	Worsen (Cq1) - improve (Cq2)	Nq1	Cq1	Cq2	Cq2	Cq2	Cq2
	Worsen (Cq1) - improve (Cq2)	Nq1	Nq1	Cq1	Cq2	Cq2	Cq2
	Worsen (Cq1) - improve (Cq2)	Nq1	Nq1	Nq1	Cq1	Cq2	Cq2
	Worsen (Cq1) - improve (Cq2)	Nq1	Nq1	Nq1	Nq1	Cq1	Cq2
	Worsen (Cq1) - improve (Cq2)	Nq1	Nq1	Nq1	Nq1	Nq1	Cq1
Cq2	No change (Cq2)	Cq2	Cq2	Cq2	Cq2	Cq2	Cq2
	Worsen (Cq1) - improve (Nq2)	Cq2	Cq1	Nq2	Nq2	Nq2	Nq2
	Worsen (Cq1) - improve (Nq2)	Cq2	Cq2	Cq1	Nq2	Nq2	Nq2
	Worsen (Cq1) - improve (Nq2)	Cq2	Cq2	Cq2	Cq1	Nq2	Nq2
	Worsen (Cq1) - improve (Nq2)	Cq2	Cq2	Cq2	Cq2	Cq1	Nq2
	Worsen (Cq1) - improve (Nq2)	Cq2	Cq2	Cq2	Cq2	Cq2	Cq1
	Worsen (Cq1) - improve (Cq2)	Cq2	Cq1	Cq2	Cq2	Cq2	Cq2
	Worsen (Cq1) - improve (Cq2)	Cq2	Cq2	Cq1	Cq2	Cq2	Cq2
	Worsen (Cq1) - improve (Cq2)	Cq2	Cq2	Cq2	Cq1	Cq2	Cq2
	Worsen (Cq1) - improve (Cq2)	Cq2	Cq2	Cq2	Cq2	Cq1	Cq2
	Worsen (Cq1) - improve (Cq2)	Cq2	Cq2	Cq2	Cq2	Cq2	Cq1
Cq1	No change (Cq1)	Cq1	Cq1	Cq1	Cq1	Cq1	Cq1
	Improve (Cq2)	Cq1	Cq2	Cq2	Cq2	Cq2	Cq2
	Improve (Cq2)	Cq1	Cq1	Cq2	Cq2	Cq2	Cq2
	Improve (Cq2)	Cq1	Cq1	Cq1	Cq2	Cq2	Cq2
	Improve (Cq2)	Cq1	Cq1	Cq1	Cq1	Cq2	Cq2
	Improve (Cq2)	Cq1	Cq1	Cq1	Cq1	Cq1	Cq2
	Improve (Nq2)	Cq1	Nq2	Nq2	Nq2	Nq2	Nq2
	Improve (Nq2)	Cq1	Cq1	Nq2	Nq2	Nq2	Nq2
	Improve (Nq2)	Cq1	Cq1	Cq1	Nq2	Nq2	Nq2
	Improve (Nq2)	Cq1	Cq1	Cq1	Cq1	Nq2	Nq2
	Improve (Nq2)	Cq1	Cq1	Cq1	Cq1	Cq1	Nq2
	Worsen (Pq1) - improve (Cq1)	Cq1	Pq1	Cq1	Cq1	Cq1	Cq1
	Worsen (Pq1) - improve (Cq1)	Cq1	Cq1	Pq1	Cq1	Cq1	Cq1
	Worsen (Pq1) - improve (Cq1)	Cq1	Cq1	Cq1	Pq1	Cq1	Cq1
	Worsen (Pq1) - improve (Cq1)	Cq1	Cq1	Cq1	Cq1	Pq1	Cq1
	Worsen (Pq1) - improve (Cq1)	Cq1	Cq1	Cq1	Cq1	Cq1	Pq1
Pq1	No change (Pq1)	Pq1	Pq1	Pq1	Pq1	Pq1	Pq1
	Improve (Cq1)	Pq1	Cq1	Cq1	Cq1	Cq1	Cq1
	Improve (Cq1)	Pq1	Pq1	Cq1	Cq1	Cq1	Cq1
	Improve (Cq1)	Pq1	Pq1	Pq1	Cq1	Cq1	Cq1
	Improve (Cq1)	Pq1	Pq1	Pq1	Pq1	Cq1	Cq1
	Improve (Cq1)	Pq1	Pq1	Pq1	Pq1	Pq1	Cq1

## Sheet: Clinical Algorithm 7.31
Category 0	Enrollment month	1	2	3	4	5	6	7	8	9	10	11	12	13	14	15	16	17	18	19	20	21	22	23	24	25	26	27	28	29	30	31	32	33	34	35	36
Nq6	HTN Rx month	0: Education
SBP <140 and DBP < 90 without lifestyle modification or Rx	Physician
Re-evaluate every 12 months	Clinical Officer
	Nurse	x												x												x
	Pharmacist
	Triage Staff/Technician	x												x												x
Category 1	Enrollment month	1	2	3	4	5	6	7	8	9	10	11	12	13	14	15	16	17	18	19	20	21	22	23	24	25	26	27	28	29	30	31	32	33	34	35	36
Nq6	HTN Rx month	1	2	3	4	5	6	7	8	9	10	11	12	13	14	15	16	17	18	19	20	21	22	23	24	25	26	27	28	29	30	31	32	33	34	35	36
SBP <140 and DBP < 90 with lifestyle modification only	Physician
Re-evaluate every 6 months	Clinical Officer
	Nurse	x						x						x						x						x						x
	Pharmacist
	Triage Staff/Technician	x						x						x						x						x						x
Category 2	Enrollment month	1	2	3	4	5	6	7	8	9	10	11	12	13	14	15	16	17	18	19	20	21	22	23	24	25	26	27	28	29	30	31	32	33	34	35	36
Nq2	HTN Rx month	1	2	3	4	5	6	7	8	9	10	11	12	13	14	15	16	17	18	19	20	21	22	23	24	25	26	27	28	29	30	31	32	33	34	35	36
SBP <140 and DBP < 90 with Rx, seen by nurse	Physician
Re-evaluate every 2 months	Clinical Officer
	Nurse	x		x		x		x		x		x		x		x		x		x		x		x		x		x		x		x		x		x
	Pharmacist	x		x		x		x		x		x		x		x		x		x		x		x		x		x		x		x		x		x
	Triage Staff/Technician	x		x		x		x		x		x		x		x		x		x		x		x		x		x		x		x		x		x
Category 3	Enrollment month	1	2	3	4	5	6	7	8	9	10	11	12	13	14	15	16	17	18	19	20	21	22	23	24	25	26	27	28	29	30	31	32	33	34	35	36
Nq2	HTN Rx month	1	2	3	4	5	6	7	8	9	10	11	12	13	14	15	16	17	18	19	20	21	22	23	24	25	26	27	28	29	30	31	32	33	34	35	36
SBP <140 and DBP < 90 with Rx, referred to nurse from CO	Physician
Re-evaluate after 2 months x3	Clinical Officer
	Nurse	x		x		x
	Pharmacist	x		x		x
	Triage Staff/Technician	x		x		x
Category 4a	Enrollment month	1	2	3
Cq1	HTN Rx month	1	2	3
SBP <140 and DBP <90 with Rx, seen by CO	Physician
Re-evaluate after monthly visit x3	Clinical Officer	x	x	x
	Nurse
	Pharmacist	x	x	x
	Triage Staff/Technician	x	x	x
Category 4b	Enrollment month	1	2	3
Cq1	HTN Rx month	1	2	3
SBP <140 and DBP <90 with Rx, patient is pregnant/DM/<35yo, just referred to CO from physician	Physician
Re-evaluate after monthly visit x3	Clinical Officer	x	x	x
	Nurse
	Pharmacist	x	x	x
	Triage Staff/Technician	x	x	x
Category 4c	Enrollment month	1	2	3	4	5	6	7	8	9	10	11	12	13	14	15	16	17	18	19	20	21	22	23	24	25	26	27	28	29	30	31	32	33	34	35	36
Cq2	HTN Rx month	1	2	3	4	5	6	7	8	9	10	11	12	13	14	15	16	17	18	19	20	21	22	23	24	25	26	27	28	29	30	31	32	33	34	35	36
SBP <140 and DBP < 90 with Rx, patient is pregnant/DM/<35yo, seen by CO	Physician
Re-evaluate after 2 months x3	Clinical Officer	x		x		x
	Nurse
	Pharmacist	x		x		x
	Triage Staff/Technician	x		x		x
Category 5	Enrollment month	1	2	3	4	5	6	7	8	9	10	11	12	13	14	15	16	17	18	19	20	21	22	23	24	25	26	27	28	29	30	31	32	33	34	35	36
Cq2	HTN Rx month	1	2	3	4	5	6	7	8	9	10	11	12	13	14	15	16	17	18	19	20	21	22	23	24	25	26	27	28	29	30	31	32	33	34	35	36
SBP <140 and DBP < 90 with Rx, patient is pregnant/DM/<35yo, long term seen by CO	Physician
Re-evaluate every 2 months	Clinical Officer	x		x		x		x		x		x		x		x		x		x		x		x		x		x		x		x		x		x
	Nurse
	Pharmacist	x		x		x		x		x		x		x		x		x		x		x		x		x		x		x		x		x		x
	Triage Staff/Technician	x		x		x		x		x		x		x		x		x		x		x		x		x		x		x		x		x		x
Category 6	Enrollment month	1	2	3	4	5	6	7	8	9	10	11	12	13	14	15	16	17	18	19	20	21	22	23	24	25	26	27	28	29	30	31	32	33	34	35	36
Nq1	HTN Rx month	0: Lifestyle Mod
SBP ≥140 and <180 or DBP ≥90 and <110, not on any Rx	Physician
Re-evaluate after 1 month	Clinical Officer
	Nurse	x
	Pharmacist
	Triage Staff/Technician	x
Category 7	Enrollment month	1	2	3	4	5	6	7	8	9	10	11	12	13	14	15	16	17	18	19	20	21	22	23	24	25	26	27	28	29	30	31	32	33	34	35	36
Nq1	HTN Rx month	1: HCTZ
SBP ≥140 and <180 or DBP ≥90 and <110 after lifestyle modification, not on any Rx	Physician
Re-evaluate after 1 month	Clinical Officer
	Nurse	x
	Pharmacist	x
	Triage Staff/Technician	x
Category 8	Enrollment month	1	2	3	4	5	6	7	8	9	10	11	12	13	14	15	16	17	18	19	20	21	22	23	24	25	26	27	28	29	30	31	32	33	34	35	36
Nq1	HTN Rx month	1: HCTZ	2: HCTZ	3: HCTZ
SBP ≥140 and <180 or DBP ≥90 and <110 already on Rx, seen by nurse	Physician
Re-evaluate after 3 months	Clinical Officer
	Nurse	x	x	x
	Pharmacist	x	x	x
	Triage Staff/Technician	x	x	x
Category 9	Enrollment month	1	2	3	4	5	6	7	8	9	10	11	12	13	14	15	16	17	18	19	20	21	22	23	24	25	26	27	28	29	30	31	32	33	34	35	36
Cq1	HTN Rx month	1
SBP ≥140 or DBP ≥90, on Rx, referred to CO	Physician
Re-evaluate after 1 month	Clinical Officer	x
	Nurse
	Pharmacist	x
	Triage Staff/Technician	x
Category 9a	Enrollment month	1	2	3	4	5	6	7	8	9	10	11	12	13	14	15	16	17	18	19	20	21	22	23	24	25	26	27	28	29	30	31	32	33	34	35	36
Cq1	HTN Rx month	1: HCTZ+CCB
SBP ≥140 or DBP ≥90, on HCTZ+CCB, seen by CO	Physician
Re-evaluate after 1 month	Clinical Officer	x
	Nurse
	Pharmacist	x
	Triage Staff/Technician	x
Category 9b	Enrollment month	1	2	3	4	5	6	7	8	9	10	11	12	13	14	15	16	17	18	19	20	21	22	23	24	25	26	27	28	29	30	31	32	33	34	35	36
Cq1	HTN Rx month	1: HCTZ+CCB/ACEi
SBP ≥140 or DBP ≥90, on HCTZ+max CCB/ACEi, seen by CO	Physician
Re-evaluate after 1 month	Clinical Officer	x
	Nurse
	Pharmacist	x
	Triage Staff/Technician	x
Category 9c	Enrollment month	1	2	3	4	5	6	7	8	9	10	11	12	13	14	15	16	17	18	19	20	21	22	23	24	25	26	27	28	29	30	31	32	33	34	35	36
Cq1	HTN Rx month	1: HCTZ+CCB/ACEi
SBP ≥140 or DBP ≥90, on HCTZ+max CCB/ACEi, seen by CO and needs labs	Physician
Re-evaluate after 1 month	Clinical Officer	x
	Nurse
	Pharmacist	x
	Triage Staff/Technician	x
Category 9d	Enrollment month	1	2	3	4	5	6	7	8	9	10	11	12	13	14	15	16	17	18	19	20	21	22	23	24	25	26	27	28	29	30	31	32	33	34	35	36
Cq1	HTN Rx month	1: HCTZ+CCB+ACEi
SBP ≥140 or DBP ≥90, on HCTZ+max CCB+ACEi, seen by CO	Physician
Re-evaluate after 1 month	Clinical Officer	x
	Nurse
	Pharmacist	x
	Triage Staff/Technician	x
Category 10	Enrollment month	1	2	3	4	5	6	7	8	9	10	11	12	13	14	15	16	17	18	19	20	21	22	23	24	25	26	27	28	29	30	31	32	33	34	35	36
Pq1	HTN Rx month	1
SBP ≥140 or DBP ≥90, or has Sx's of end-organ damage, referred to physician from CO	Physician	x
Re-evaluate after 1 month	Clinical Officer
	Nurse
	Pharmacist	x
	Triage Staff/Technician	x
Category 11	Enrollment month	1	2	3	4	5	6	7	8	9	10	11	12	13	14	15	16	17	18	19	20	21	22	23	24	25	26	27	28	29	30	31	32	33	34	35	36
Nq1	HTN Rx month	1
SBP ≥180 or DBP ≥110 not on any Rx	Physician
Re-evaluate after 1 month	Clinical Officer
	Nurse	x
	Pharmacist
	Triage Staff/Technician	x
Category 12	Enrollment month	1	2	3	4	5	6	7	8	9	10	11	12	13	14	15	16	17	18	19	20	21	22	23	24	25	26	27	28	29	30	31	32	33	34	35	36
Cq1	HTN Rx month	1	2	3	4
SBP ≥180 or DBP ≥110 already on Rx	Physician
Re-evaluate after 4 months	Clinical Officer	x	x	x	x
	Nurse
	Pharmacist	x	x	x	x
	Triage Staff/Technician	x	x	x	x
Category 13	Enrollment month	1	2	3	4	5	6	7	8	9	10	11	12	13	14	15	16	17	18	19	20	21	22	23	24	25	26	27	28	29	30	31	32	33	34	35	36
Cq1	HTN Rx month	1
Symptoms of end-organ damage refer to CO	Physician
Re-evaluate after 1 month	Clinical Officer	x
	Nurse
	Pharmacist	x
	Triage Staff/Technician	x
Category 15	Enrollment month	1	2	3	4	5	6	7	8	9	10	11	12	13	14	15	16	17	18	19	20	21	22	23	24	25	26	27	28	29	30	31	32	33	34	35	36
Nq1	HTN Rx month	1
SBP ≥140 and <180 or DBP ≥90 and <110, on no Rx and is pregnant/DM/<35yo, new patient	Physician
Re-evaluate after 1 month	Clinical Officer
	Nurse	x
	Pharmacist	x
	Triage Staff/Technician	x
Category 16	Enrollment month	1	2	3	4	5	6	7	8	9	10	11	12	13	14	15	16	17	18	19	20	21	22	23	24	25	26	27	28	29	30	31	32	33	34	35	36
Cq1	HTN Rx month	1	2	3	4
SBP ≥140 and <180 or DBP ≥90 and <110, on Rx and is pregnant/DM/<35yo, referred to CO by nurse	Physician
Re-evaluate after 4 months	Clinical Officer	x	x	x	x
	Nurse
	Pharmacist	x	x	x	x
	Triage Staff/Technician	x	x	x	x
Category 17	Enrollment month	1	2	3	4	5	6	7	8	9	10	11	12	13	14	15	16	17	18	19	20	21	22	23	24	25	26	27	28	29	30	31	32	33	34	35	36
Cq1	HTN Rx month	1: Do labs
Diabetic, SBP ≥140 and <180 or DBP ≥90 and <110, referred to CO	Physician
Re-evaluate after 1 month	Clinical Officer	x
	Nurse
	Pharmacist	x
	Triage Staff/Technician	x
Category 17a	Enrollment month	1	2	3	4	5	6	7	8	9	10	11	12	13	14	15	16	17	18	19	20	21	22	23	24	25	26	27	28	29	30	31	32	33	34	35	36
Cq1	HTN Rx month	1
Diabetic, SBP ≥140 and <180 or DBP ≥90 and <110, normal Cr/K	Physician
Re-evaluate after 1 month	Clinical Officer	x
	Nurse
	Pharmacist
	Triage Staff/Technician	x
Category 17b	Enrollment month	1	2	3	4	5	6	7	8	9	10	11	12	13	14	15	16	17	18	19	20	21	22	23	24	25	26	27	28	29	30	31	32	33	34	35	36
Cq1	HTN Rx month	1
Diabetic, SBP ≥140 and <180 or DBP ≥90 and <110, elevated Cr/K	Physician
Re-evaluate after 1 month	Clinical Officer	x
	Nurse
	Pharmacist
	Triage Staff/Technician	x
Category 17c	Enrollment month	1	2	3	4	5	6	7	8	9	10	11	12	13	14	15	16	17	18	19	20	21	22	23	24	25	26	27	28	29	30	31	32	33	34	35	36
Cq1	HTN Rx month	1: ACEi 10mg	?	?
Diabetic, SBP ≥140 and <180 or DBP ≥90 and <110, normal Cr/K, needs to start Rx	Physician
Re-evaluate after 3 months	Clinical Officer	x
	Nurse
	Pharmacist	x
	Triage Staff/Technician	x
Category 17d	Enrollment month	1	2	3	4	5	6	7	8	9	10	11	12	13	14	15	16	17	18	19	20	21	22	23	24	25	26	27	28	29	30	31	32	33	34	35	36
Cq1	HTN Rx month	1: ACEi	?	?
Diabetic, SBP ≥140 and <180 or DBP ≥90 and <110, normal Cr/K, already on ACEi	Physician
Re-evaluate after 3 months	Clinical Officer	x
	Nurse
	Pharmacist	x
	Triage Staff/Technician	x
Category 18	Enrollment month	1	2	3	4	5	6	7	8	9	10	11	12	13	14	15	16	17	18	19	20	21	22	23	24	25	26	27	28	29	30	31	32	33	34	35	36
Cq1	HTN Rx month	1: Enalapril 20mg BD	2: Enalapril 20mg BD	3: Enalapril 20 mg BD
Diabetic, SBP ≥140 and <180 or DBP ≥90 and <110, on low dose ACEi	Physician
Re-evaluate after 3 months	Clinical Officer	x	x	x
	Nurse
	Pharmacist	x	x	x
	Triage Staff/Technician	x	x	x
Category 19	Enrollment month	1	2	3	4	5	6	7	8	9	10	11	12	13	14	15	16	17	18	19	20	21	22	23	24	25	26	27	28	29	30	31	32	33	34	35	36
Cq1	HTN Rx month	1: +CCB
Diabetic, SBP ≥130 and <170 or DBP ≥85 and <110, start CCB	Physician
Re-evaluate after 1 month	Clinical Officer	x
	Nurse
	Pharmacist	x
	Triage Staff/Technician	x
Category 20	Enrollment month	1	2	3	4	5	6	7	8	9	10	11	12	13	14	15	16	17	18	19	20	21	22	23	24	25	26	27	28	29	30	31	32	33	34	35	36
Cq1	HTN Rx month	1: Losartan	2: Losartan	3: Losartan
Diabetic, SBP ≥130 and <170 or DBP ≥85 and <110, cannot tolerate ACEi	Physician
Re-evaluate after 3 months	Clinical Officer	x	x	x
	Nurse
	Pharmacist	x	x	x
	Triage Staff/Technician	x	x	x
Category 21	Enrollment month	1	2	3	4	5	6	7	8	9	10	11	12	13	14	15	16	17	18	19	20	21	22	23	24	25	26	27	28	29	30	31	32	33	34	35	36
Cq1	HTN Rx month	1: +HCTZ	2: +HCTZ	3: +HCTZ
Diabetic, SBP ≥130 and <170 or DBP ≥85 and <110, on max dose ACEi/ARB/min CCB	Physician
Re-evaluate after 3 months	Clinical Officer	x	x	x
	Nurse
	Pharmacist	x	x	x
	Triage Staff/Technician	x	x	x
Category 22	Enrollment month	1	2	3	4	5	6	7	8	9	10	11	12	13	14	15	16	17	18	19	20	21	22	23	24	25	26	27	28	29	30	31	32	33	34	35	36
Cq1	HTN Rx month	1: increase CCB	2: increase CCB	3: increase CCB
Diabetic, SBP ≥130 and <170 or DBP ≥85 and <110, on max ACEi/ARB/min CCB + HCTZ	Physician
Re-evaluate after 3 months	Clinical Officer	x	x	x
	Nurse
	Pharmacist	x	x	x
	Triage Staff/Technician	x	x	x
Category 23	Enrollment month	1	2	3	4	5	6	7	8	9	10	11	12	13	14	15	16	17	18	19	20	21	22	23	24	25	26	27	28	29	30	31	32	33	34	35	36
Cq1	HTN Rx month	1: increase CCB	2: increase CCB	3: increase CCB
Diabetic, SBP ≥130 and <170 or DBP ≥85 and <110, on ACEi/ARB + HCTZ + moderate CCB	Physician
Re-evaluate after 3 months	Clinical Officer	x	x	x
	Nurse
	Pharmacist	x	x	x
	Triage Staff/Technician	x	x	x
Category 24	Enrollment month	1	2	3	4	5	6	7	8	9	10	11	12	13	14	15	16	17	18	19	20	21	22	23	24	25	26	27	28	29	30	31	32	33	34	35	36
Pq1	HTN Rx month	1
SBP ≥130 and <170 or DBP ≥85 and <110, on max Rx and DM/pregnant/<35yo, referred to physician	Physician	x
Re-evaluate after 1 month	Clinical Officer
	Nurse
	Pharmacist	x
	Triage Staff/Technician	x
Category 25	Enrollment month	1	2	3	4	5	6	7	8	9	10	11	12	13	14	15	16	17	18	19	20	21	22	23	24	25	26	27	28	29	30	31	32	33	34	35	36
Pq1	HTN Rx month	1	2
Diabetic, with symptoms of end-organ damage, and not on Rx	Physician		x
Re-evaluate after 2 months	Clinical Officer
	Nurse	x
	Pharmacist	x	x
	Triage Staff/Technician	x	x
Category 26	Enrollment month	1	2	3	4	5	6	7	8	9	10	11	12	13	14	15	16	17	18	19	20	21	22	23	24	25	26	27	28	29	30	31	32	33	34	35	36
Pq1	HTN Rx month	1
Diabetic, with symptoms of end-organ damage, already on Rx	Physician	x
Re-evaluate after 1 month	Clinical Officer
	Nurse
	Pharmacist	x
	Triage Staff/Technician	x

## Sheet: AMPATH Flowchart
When patients enroll with the AMPATH CDM program, they can enter at these categories only: Category 0, 6, 11, 13, 15, 17, 25
See Appendix A for descriptions of AMPATH Flowchart Categories
Category		Option		Outcome
Category 0		BP controlled		BP is already controlled
Nq6		No clinical change		Category 0	Nq6
SBP <140 and DBP < 90 without lifestyle modification or Rx		Worsen		Category 6	Nq1
Category 1		BP controlled		BP is already controlled
Nq6		No clinical change		Category 1	Nq6
SBP <140 and DBP < 90 with lifestyle modification only		Worsen		Category 6	Nq1
Category 2		BP controlled		BP is already controlled
Nq2		No clinical change		Category 2	Nq2
SBP <140 and DBP < 90 with Rx, seen by nurse		Worsen		Category 8	Nq1
Category 3		BP controlled		BP is already controlled
Nq2		No clinical change		Category 2	Nq2
SBP <140 and DBP < 90 with Rx, referred to nurse from CO		Worsen		Category 9	Cq1
Category 4a		BP controlled		BP is already controlled
Cq1		No clinical change		Category 3	Nq2
SBP <140 and DBP <90 with Rx, seen by CO		Worsen		Category 9	Cq1
Category 4b		BP controlled		BP is already controlled
Cq1		No clinical change		Category 4c	Cq2
SBP <140 and DBP <90 with Rx, patient is pregnant/DM/<35yo, just referred to CO from physician		Worsen		Category 16	Cq1
Category 4c		BP controlled		BP is already controlled
Cq2		No clinical change		Category 5	Cq2
SBP <140 and DBP < 90 with Rx, patient is pregnant/DM/<35yo, seen by CO		Worsen		Category 16	Cq1
Category 5		BP controlled		BP is already controlled
Cq2		No clinical change		Category 5	Cq2
SBP <140 and DBP < 90 with Rx, patient is pregnant/DM/<35yo, long term seen by CO		Worsen		Category 16	Cq1
Category 6		BP controlled		Category 1	Nq6
Nq1		No clinical change		Category 7	Nq1
SBP ≥140 and <180 or DBP ≥90 and <110, not on any Rx		Worsen		Category 11	Nq1
		End-organ damage		Category 13	Cq1
Category 7		BP controlled		Category 2	Nq2
Nq1		No clinical change		Category 8	Nq1
SBP ≥140 and <180 or DBP ≥90 and <110 after lifestyle modification, not on any Rx		Worsen		Category 12	Cq1
		End-organ damage		Category 13	Cq1
Category 8		BP controlled		Category 2	Nq2
Nq1		No clinical change		Category 9	Cq1
SBP ≥140 and <180 or DBP ≥90 and <110 already on Rx, seen by nurse		Worsen		Category 12	Cq1
		End-organ damage		Category 13	Cq1
Category 9		Labs normal		Category 9a	Cq1
Cq1		Labs abnormal		Category 10	Pq1
SBP ≥140 or DBP ≥90, on Rx, referred to CO
Category 9a		BP controlled		Category 4a	Cq1
Cq1		No clinical change		Category 9b	Cq1
SBP ≥140 or DBP ≥90, on HCTZ+CCB, seen by CO		Worsen		Category 9b	Cq1
Category 9b		BP controlled		Category 4a	Cq1
Cq1		No clinical change		Category 9c	Cq1
SBP ≥140 or DBP ≥90, on HCTZ+max CCB/ACEi, seen by CO		Worsen		Category 9c	Cq1
Category 9c		Labs normal		Category 9d	Cq1
Cq1		Labs abnormal		Category 10	Pq1
SBP ≥140 or DBP ≥90, on HCTZ+max CCB/ACEi, seen by CO and needs labs
Category 9d		BP controlled		Category 4a	Cq1
Cq1		No clinical change		Category 10	Pq1
SBP ≥140 or DBP ≥90, on HCTZ+max CCB+ACEi, seen by CO		Worsen		Category 10	Pq1
Category 10		BP controlled		Category 4a	Cq1
Pq1		No clinical change		Category 10	Pq1
SBP ≥140 or DBP ≥90, or has Sx's of end-organ damage, referred to physician from CO		Worsen		Category 10	Pq1
Category 11		BP controlled		Category 9	Cq1
Nq1		No clinical change		Category 9	Cq1
SBP ≥180 or DBP ≥110 not on any Rx		Worsen		Category 9	Cq1
Category 12		BP controlled		Category 3	Nq2
Cq1		No clinical change		Category 10	Pq1
SBP ≥180 or DBP ≥110 already on Rx		Worsen		Category 10	Pq1
Category 13		BP controlled		Category 3	Nq2
Cq1		No clinical change		Category 10	Pq1
Symptoms of end-organ damage refer to CO		Worsen		Category 10	Pq1
Category 15		BP controlled		Category 16	Cq1
Nq1		No clinical change		Category 16	Cq1
SBP ≥140 and <180 or DBP ≥90 and <110, on no Rx and is pregnant/DM/<35yo, new patient		Worsen		Category 24	Pq1
Category 16		BP controlled		Category 5	Cq2
Cq1		No clinical change		Category 24	Pq1
SBP ≥140 and <180 or DBP ≥90 and <110, on Rx and is pregnant/DM/<35yo, referred to CO by nurse		Worsen		Category 24	Pq1
Category 17		Labs normal		Category 17a	Cq1
Cq1		Labs abnormal		Category 17b	Cq1
Diabetic, SBP ≥140 and <180 or DBP ≥90 and <110, referred to CO
Category 17a		Start ACEi		Category 17c	Cq1
Cq1		Already on ACEi		Category 17d	Cq1
Diabetic, SBP ≥140 and <180 or DBP ≥90 and <110, normal Cr/K
Category 17b
Cq1		Start CCB, stop ACEi		Category 19	Cq1
Diabetic, SBP ≥140 and <180 or DBP ≥90 and <110, elevated Cr/K
Category 17c		BP controlled		Category 4c	Cq2
Cq1		No clinical change, tolerating ACEi		Category 18	Cq1
Diabetic, SBP ≥140 and <180 or DBP ≥90 and <110, normal Cr/K, needs to start Rx		No clinical change, not tolerating ACEi		Category 20	Cq1
		Worsen		Category 10	Pq1
Category 17d		BP controlled		Category 4c	Cq2
Cq1		No clinical change, tolerating ACEi		Category 18	Cq1
Diabetic, SBP ≥140 and <180 or DBP ≥90 and <110, normal Cr/K, already on ACEi		No clinical change, not tolerating ACEi		Category 20	Cq1
		Worsen		Category 10	Pq1
Category 18		BP controlled		Category 4c	Cq2
Cq1		No clinical change		Category 19	Cq1
Diabetic, SBP ≥140 and <180 or DBP ≥90 and <110, on low dose ACEi		Worsen		Category 24	Pq1
		Worsen		Category 10	Pq1
Category 19		BP controlled		Category 4c	Cq2
Cq1		No clinical change		Category 21	Cq1
Diabetic, SBP ≥130 and <170 or DBP ≥85 and <110, start CCB		Worsen		Category 24	Pq1
		Worsen		Category 10	Pq1
Category 20		BP controlled		Category 4c	Cq2
Cq1		No clinical change		Category 19	Cq1
Diabetic, SBP ≥130 and <170 or DBP ≥85 and <110, cannot tolerate ACEi		Worsen		Category 24	Pq1
		Worsen		Category 10	Pq1
Category 21		BP controlled		Category 4c	Cq2
Cq1		No clinical change		Category 22	Cq1
Diabetic, SBP ≥130 and <170 or DBP ≥85 and <110, on max dose ACEi/ARB/min CCB		Worsen		Category 24	Pq1
		Worsen	è	Category 10	Pq1
Category 22		BP controlled		Category 4c	Cq2
Cq1		No clinical change		Category 23	Cq1
Diabetic, SBP ≥130 and <170 or DBP ≥85 and <110, on max ACEi/ARB/min CCB + HCTZ		Worsen		Category 24	Pq1
		Worsen	è	Category 10	Pq1
Category 23		BP controlled		Category 5	Cq2
Cq1		No clinical change		Category 24	Pq1
Diabetic, SBP ≥130 and <170 or DBP ≥85 and <110, on ACEi/ARB + HCTZ + moderate CCB		Worsen		Category 24	Pq1
		Worsen	è	Category 10	Pq1
Category 24		BP controlled		Category 4b	Cq1
Pq1		No clinical change		Category 24	Pq1
SBP ≥130 and <170 or DBP ≥85 and <110, on max Rx and DM/pregnant/<35yo, referred to physician		Worsen		Category 24	Pq1
		Worsen	è	Category 10	Pq1
Category 25		Can be seen by CO		Category 4b	Cq1
Pq1		Needs to be seen by physician		Category 26	Pq1
Diabetic, with symptoms of end-organ damage, and not on Rx		Worsen		Category 26	Pq1
Category 26		BP controlled		Category 4b	Cq1
Pq1		No clinical change		Category 26	Pq1
Diabetic, with symptoms of end-organ damage, already on Rx		Worsen		Category 26	Pq1

## Sheet: Clinical Algorithm 7.09
BP measurement	HTN Level	Notes
SBP <140 and DBP < 90	Level 0	Has reached target BP
SBP ≥140 and <180 or DBP ≥90 and <110	Level 1	Hypertensive
SBP ≥180 or DBP ≥110	Level 2	Hypertensive Urgency
Symptomatic: DOE, edema, reduced urine output	Level 3	can go back down to dispensary level			What actually happens when a patient becomes symptomatic? Algorithm not clear.
SBP ≥140/90 and pregnant/DM/<35yo	Level 4	can never go back to dispensary level			What does Level 4 maintenance look like?
Diabetic + BP >130/85 and <170/110	Level 5	can never go back to dispensary level			What does Level 5 maintenance look like?
Diabetic + Target organ damage	Level 6	Hypertensive emergency + DM
Level 0 - Nurse	Enrollment month	1	2	3	4	5	6	7	8	9	10	11	12	13	14	15	16	17	18	19	20	21	22	23	24	25	26	27	28	29	30	31	32	33	34	35	36
If patient enrolls as Level 0	HTN Rx month	0: Education
	Physician
Re-evaluate every 12 months	Clinical Officer
	Nurse	x												x												x
	Pharmacist
	Triage Staff/Technician	x												x												x
Level 0 - Nurse	Enrollment month	1	2	3	4	5	6	7	8	9	10	11	12	13	14	15	16	17	18	19	20	21	22	23	24	25	26	27	28	29	30	31	32	33	34	35	36
If patient reaches Level 0 without any Rx	HTN Rx month	1	2	3	4	5	6	7	8	9	10	11	12	13	14	15	16	17	18	19	20	21	22	23	24	25	26	27	28	29	30	31	32	33	34	35	36
	Physician
Re-evaluate every 6 months	Clinical Officer
	Nurse	x						x						x						x						x						x
	Pharmacist	x						x						x						x						x						x
	Triage Staff/Technician	x						x						x						x						x						x
Level 0 - Nurse	Enrollment month	1	2	3	4	5	6	7	8	9	10	11	12	13	14	15	16	17	18	19	20	21	22	23	24	25	26	27	28	29	30	31	32	33	34	35	36
If patient reaches Level 0 with Rx after seeing CO	HTN Rx month	1	2	3	4	5	6	7	8	9	10	11	12	13	14	15	16	17	18	19	20	21	22	23	24	25	26	27	28	29	30	31	32	33	34	35	36
	Physician
Re-evaluate after 6 months	Clinical Officer
	Nurse	x		x		x
	Pharmacist	x		x		x
	Triage Staff/Technician	x		x		x
Level 0 - Nurse	Enrollment month	1	2	3	4	5	6	7	8	9	10	11	12	13	14	15	16	17	18	19	20	21	22	23	24	25	26	27	28	29	30	31	32	33	34	35	36
If patient reaches Level 0 with Rx without seeing CO, or after remaining at Level 0 for 3 consecutive visits every 2 months with nurse	HTN Rx month	1	2	3	4	5	6	7	8	9	10	11	12	13	14	15	16	17	18	19	20	21	22	23	24	25	26	27	28	29	30	31	32	33	34	35	36
	Physician
Re-evaluate every 4 months	Clinical Officer
	Nurse	x				x				x				x				x				x				x				x				x
	Pharmacist	x				x				x				x				x				x				x				x				x
	Triage Staff/Technician	x				x				x				x				x				x				x				x				x
Level 0 - CO	Enrollment month	1	2	3	4	5	6	7	8	9	10	11	12	13	14	15	16	17	18	19	20	21	22	23	24	25	26	27	28	29	30	31	32	33	34	35	36
If patient reaches level 0 but is pregnant/DM/<35yo	HTN Rx month	1	2	3	4	5	6	7	8	9	10	11	12	13	14	15	16	17	18	19	20	21	22	23	24	25	26	27	28	29	30	31	32	33	34	35	36
	Physician
Re-evaluate every 4 months	Clinical Officer	x				x				x				x				x				x				x				x				x
	Nurse
	Pharmacist	x				x				x				x				x				x				x				x				x
	Triage Staff/Technician	x				x				x				x				x				x				x				x				x
Level 1 - Nurse	Enrollment month	1	2	3	4	5	6	7	8	9	10	11	12	13	14	15	16	17	18	19	20	21	22	23	24	25	26	27	28	29	30	31	32	33	34	35	36
If patient enrolls as Level 1	HTN Rx month	0: Lifestyle Mod
	Physician
Re-evaluate after 1 month	Clinical Officer
	Nurse	x
	Pharmacist
	Triage Staff/Technician	x
Level 1 - Nurse	Enrollment month	1	2	3	4	5	6	7	8	9	10	11	12	13	14	15	16	17	18	19	20	21	22	23	24	25	26	27	28	29	30	31	32	33	34	35	36
If patient remains at Level 1 after lifestyle modification	HTN Rx month	1: HCTZ
	Physician
Re-evaluate after 1 month	Clinical Officer
	Nurse	x
	Pharmacist	x
	Triage Staff/Technician	x
Level 1 - Nurse	Enrollment month	1	2	3	4	5	6	7	8	9	10	11	12	13	14	15	16	17	18	19	20	21	22	23	24	25	26	27	28	29	30	31	32	33	34	35	36
If patient remains at Level 1 after 1 month of Rx	HTN Rx month	1: HCTZ	2: HCTZ	3: HCTZ
	Physician
Re-evaluate after 3 months	Clinical Officer
	Nurse	x	x	x
	Pharmacist	x	x	x
	Triage Staff/Technician	x	x	x
Level 1 - CO	Enrollment month	1	2	3	4	5	6	7	8	9	10	11	12	13	14	15	16	17	18	19	20	21	22	23	24	25	26	27	28	29	30	31	32	33	34	35	36
If patient remains at Level 1 after 4 months of Rx with nurse	HTN Rx month	1: HCTZ	2: HCTZ	3: HCTZ	4: HCTZ
	Physician
Re-evaluate after 4 months	Clinical Officer	x	x	x	x
	Nurse
	Pharmacist	x	x	x	x
	Triage Staff/Technician	x	x	x	x
Level 1 - Physician	Enrollment month	1	2	3	4	5	6	7	8	9	10	11	12	13	14	15	16	17	18	19	20	21	22	23	24	25	26	27	28	29	30	31	32	33	34	35	36
If patient remains at Level 1 after 8 months of Rx	HTN Rx month	1: HCTZ
	Physician	x
Re-evaluate after 1 month	Clinical Officer
	Nurse
	Pharmacist	x
	Triage Staff/Technician	x
Level 2 - Nurse, CO	Enrollment month	1	2	3	4	5	6	7	8	9	10	11	12	13	14	15	16	17	18	19	20	21	22	23	24	25	26	27	28	29	30	31	32	33	34	35	36
If patient enrolls as Level 2	HTN Rx month	1	2	3	4	5
	Physician
Re-evaluate after 5 months	Clinical Officer		x	x	x	x
	Nurse	x
	Pharmacist	x	x	x	x	x
	Triage Staff/Technician	x	x	x	x	x
Level 2 - CO	Enrollment month	1	2	3	4	5	6	7	8	9	10	11	12	13	14	15	16	17	18	19	20	21	22	23	24	25	26	27	28	29	30	31	32	33	34	35	36
If patient changes to Level 2	HTN Rx month	1	2	3	4
	Physician
Re-evaluate after 4 months	Clinical Officer	x	x	x	x
	Nurse
	Pharmacist	x	x	x	x
	Triage Staff/Technician	x	x	x	x
Level 3 - Nurse, CO	Enrollment month	1	2	3	4	5	6	7	8	9	10	11	12	13	14	15	16	17	18	19	20	21	22	23	24	25	26	27	28	29	30	31	32	33	34	35	36
If patient enrolls as Level 3	HTN Rx month	1	2	3	4	5
	Physician
Re-evaluate after 5 months	Clinical Officer		x	x	x	x
	Nurse	x
	Pharmacist	x	x	x	x	x
	Triage Staff/Technician	x	x	x	x	x
Level 3 - CO	Enrollment month	1	2	3	4	5	6	7	8	9	10	11	12	13	14	15	16	17	18	19	20	21	22	23	24	25	26	27	28	29	30	31	32	33	34	35	36
If patient changes to Level 3	HTN Rx month	1	2	3	4
	Physician
Re-evaluate after 4 months	Clinical Officer	x	x	x	x
	Nurse
	Pharmacist	x	x	x	x
	Triage Staff/Technician	x	x	x	x
Level 4 - Nurse, CO	Enrollment month	1	2	3	4	5	6	7	8	9	10	11	12	13	14	15	16	17	18	19	20	21	22	23	24	25	26	27	28	29	30	31	32	33	34	35	36
If patient enrolls as Level 4	HTN Rx month	1	2	3	4	5
	Physician
Re-evaluate after 5 months	Clinical Officer		x	x	x	x
	Nurse	x
	Pharmacist	x	x	x	x	x
	Triage Staff/Technician	x	x	x	x	x
Level 4 - CO	Enrollment month	1	2	3	4	5	6	7	8	9	10	11	12	13	14	15	16	17	18	19	20	21	22	23	24	25	26	27	28	29	30	31	32	33	34	35	36
If patient changes to Level 4	HTN Rx month	1	2	3	4
	Physician
Re-evaluate after 4 months	Clinical Officer	x	x	x	x
	Nurse
	Pharmacist	x	x	x	x
	Triage Staff/Technician	x	x	x	x
Level 5 - CO	Enrollment month	1	2	3	4	5	6	7	8	9	10	11	12	13	14	15	16	17	18	19	20	21	22	23	24	25	26	27	28	29	30	31	32	33	34	35	36
If patient can take ACEi	HTN Rx month	1: Enalapril 5mg BD	2: Enalapril 5mg BD	3: Enalapril 5mg BD
	Physician
Re-evaluate after 3 months	Clinical Officer	x	x	x
	Nurse
	Pharmacist	x	x	x
	Triage Staff/Technician	x	x	x
Level 5 - CO	Enrollment month	1	2	3	4	5	6	7	8	9	10	11	12	13	14	15	16	17	18	19	20	21	22	23	24	25	26	27	28	29	30	31	32	33	34	35	36
If patient is already on ACEi	HTN Rx month	1: Enalapril 20mg BD	2: Enalapril 20mg BD	3: Enalapril 20 mg BD
	Physician
Re-evaluate after 3 months	Clinical Officer	x	x	x
	Nurse
	Pharmacist	x	x	x
	Triage Staff/Technician	x	x	x
Level 5 - CO	Enrollment month	1	2	3	4	5	6	7	8	9	10	11	12	13	14	15	16	17	18	19	20	21	22	23	24	25	26	27	28	29	30	31	32	33	34	35	36
If patient is already on max ACEi	HTN Rx month	1: +HCTZ	2: +HCTZ	3: +HCTZ
	Physician
Re-evaluate after 3 months	Clinical Officer	x	x	x
	Nurse
	Pharmacist	x	x	x
	Triage Staff/Technician	x	x	x
Level 5 - CO	Enrollment month	1	2	3	4	5	6	7	8	9	10	11	12	13	14	15	16	17	18	19	20	21	22	23	24	25	26	27	28	29	30	31	32	33	34	35	36
If patient is already on max ACEi + HCTZ	HTN Rx month	1: +Nifedipine	2: +Nifedipine	3: +Nifedipine
	Physician
Re-evaluate after 3 months	Clinical Officer	x	x	x
	Nurse
	Pharmacist	x	x	x
	Triage Staff/Technician	x	x	x
Level 5 - Physician	Enrollment month	1	2	3	4	5	6	7	8	9	10	11	12	13	14	15	16	17	18	19	20	21	22	23	24	25	26	27	28	29	30	31	32	33	34	35	36
If patient is already on max ACEi + HCTZ + Nifedipine	HTN Rx month	1
	Physician	x
Re-evaluate after 1 month	Clinical Officer
	Nurse
	Pharmacist	x
	Triage Staff/Technician	x
Level 5 - CO	Enrollment month	1	2	3	4	5	6	7	8	9	10	11	12	13	14	15	16	17	18	19	20	21	22	23	24	25	26	27	28	29	30	31	32	33	34	35	36
If patient can't take ACEi	HTN Rx month	1: Losartan	2: Losartan	3: Losartan
	Physician
Re-evaluate after 3 months	Clinical Officer	x	x	x
	Nurse
	Pharmacist	x	x	x
	Triage Staff/Technician	x	x	x
Level 5 - CO	Enrollment month	1	2	3	4	5	6	7	8	9	10	11	12	13	14	15	16	17	18	19	20	21	22	23	24	25	26	27	28	29	30	31	32	33	34	35	36
If patient is already on ARB	HTN Rx month	1: +HCTZ	2: +HCTZ	3: +HCTZ
	Physician
Re-evaluate after 3 months	Clinical Officer	x	x	x
	Nurse
	Pharmacist	x	x	x
	Triage Staff/Technician	x	x	x
Level 5 - CO	Enrollment month	1	2	3	4	5	6	7	8	9	10	11	12	13	14	15	16	17	18	19	20	21	22	23	24	25	26	27	28	29	30	31	32	33	34	35	36
If patient is already on ARB + HCTZ	HTN Rx month	1: +Nifedipine	2: +Nifedipine	3: +Nifedipine
	Physician
Re-evaluate after 3 months	Clinical Officer	x	x	x
	Nurse
	Pharmacist	x	x	x
	Triage Staff/Technician	x	x	x
Level 5 - CO	Enrollment month	1	2	3	4	5	6	7	8	9	10	11	12	13	14	15	16	17	18	19	20	21	22	23	24	25	26	27	28	29	30	31	32	33	34	35	36
If patient is already on ARB + HCTZ + Nifedipine	HTN Rx month	1
	Physician	x
Re-evaluate after 1 month	Clinical Officer
	Nurse
	Pharmacist	x
	Triage Staff/Technician	x
Level 6	Enrollment month	1	2	3	4	5	6	7	8	9	10	11	12	13	14	15	16	17	18	19	20	21	22	23	24	25	26	27	28	29	30	31	32	33	34	35	36
If patient enrolls as Level 6	HTN Rx month	1	2
	Physician		x
Re-evaluate after 2 months	Clinical Officer
	Nurse	x
	Pharmacist	x	x
	Triage Staff/Technician	x	x
Level 6	Enrollment month	1	2	3	4	5	6	7	8	9	10	11	12	13	14	15	16	17	18	19	20	21	22	23	24	25	26	27	28	29	30	31	32	33	34	35	36
If patient changes to Level 6	HTN Rx month	1
	Physician	x
Re-evaluate after 1 month	Clinical Officer
	Nurse
	Pharmacist	x
	Triage Staff/Technician	x

## Sheet: Clinical Algorithm
BP measurement	HTN Level
SBP <140 and DBP < 90	Level 0
SBP ≥140 and <180 or DBP ≥90 and <110	Level 1
SBP ≥180 or DBP ≥110	Level 2
Symptomatic: DOE, edema, reduced urine output	Level 3
SBP ≥140/90 and pregnant/DM/<35yo	Level 4
Diabetic + BP >130/85 and <170/110	Level 5
Diabetic + Target organ damage	Level 6
Level 0	Enrollment month	1	2	3	4	5	6	7	8	9	10	11	12	13	14	15	16	17	18	19	20	21	22	23	24	25	26	27	28	29	30	31	32	33	34	35	36
Every 12 months	HTN Rx month	0: Education												12 mos f/u												12 mos f/u
	Physician
	Clinical Officer
	Nurse	x												x												x
	Pharmacist
	Triage Staff/Technician	x												x												x
Level 1, improve with no Rx	Enrollment month	1	2	3	4	5	6	7	8	9	10	11	12	13	14	15	16	17	18	19	20	21	22	23	24	25	26	27	28	29	30	31	32	33	34	35	36
A	HTN Rx month	0: Lifestyle Mod	0: Education						6 mos f/u						6 mos f/u						6 mos f/u						6 mos f/u						6 mos f/u
	Physician
	Clinical Officer
	Nurse	x	x						x						x						x						x						x
	Pharmacist
	Triage Staff/Technician	x	x						x						x						x						x						x
Level 1, improve with Rx	Enrollment month	1	2	3	4	5	6	7	8	9	10	11	12	13	14	15	16	17	18	19	20	21	22	23	24	25	26	27	28	29	30	31	32	33	34	35	36
	HTN Rx month	0: Lifestyle Mod	1: HCTZ	2: HCTZ	3	4		6: HCTZ, 4 mos f/u	7	8	9	10: HCTZ, 4 mos f/u	11	12	13	14: HCTZ, 4 mos f/u	15	16		18: HCTZ, 4 mos f/u	19	20	21	22: HCTZ, 4 mos f/u	23	24	25	26: HCTZ, 4 mos f/u	27	28	29	30: HCTZ, 4 mos f/u	31	32	33	34: HCTZ, 4 mos f/u	35
B	Physician
	Clinical Officer
	Nurse	x	x	x				x				x				x				x				x				x				x				x
	Pharmacist		x	x				x				x				x				x				x				x				x				x
	Triage Staff/Technician	x	x	x				x				x				x				x				x				x				x				x
Level 1, no change with Rx	Enrollment month	1	2	3	4	5	6	7	8	9	10	11	12	13	14	15	16	17	18	19	20	21	22	23	24	25	26	27	28	29	30	31	32	33	34	35	36
	HTN Rx month	0: Lifestyle Mod	1: HCTZ	2: HCTZ	3: HCTZ	4: HCTZ	5: Referred to CO	6	7	8	9: Referred to physician	10	11	12	13	14	15	16	17	18	19	20	21	22	23	24	25	26	27	28	29	30	31	32	33	34	35
C	Physician										x
	Clinical Officer						x	x	x	x
	Nurse	x	x	x	x	x
	Pharmacist		x	x	x	x	x	x	x	x	x
	Triage Staff/Technician	x	x	x	x	x	x	x	x	x	x
Level 1, no change with Rx, change to Level 0 after Rx by CO	Enrollment month	1	2	3	4	5	6	7	8	9	10	11	12	13	14	15	16	17	18	19	20	21	22	23	24	25	26	27	28	29	30	31	32	33	34	35	36
	HTN Rx month	0: Lifestyle Mod	1: HCTZ	2: HCTZ	3: HCTZ	4: HCTZ	5: Referred to CO	6	7	8	9: Referred to nurse after 3 consecutive visits w/ target BP, f/u every 2 mos x3 times	10	11	12	13	14	15: Target BP maintained after 3 visits, f/u every 4 mos	16	17	18	19	20	21	22	23	24	25	26	27	28	29	30	31	32	33	34	35
	Physician
D	Clinical Officer						x	x	x	x
	Nurse	x	x	x	x	x					x		x		x		x				x				x				x				x				x
	Pharmacist		x	x	x	x	x	x	x	x	x		x		x		x				x				x				x				x				x
	Triage Staff/Technician	x	x	x	x	x	x	x	x	x	x		x		x		x				x				x				x				x				x
Level 1, change to Level 2 with no Rx, remains at Level 1 with Rx	Enrollment month	1	2	3	4	5	6	7	8	9	10	11	12	13	14	15	16	17	18	19	20	21	22	23	24	25	26	27	28	29	30	31	32	33	34	35	36
	HTN Rx month	0: Lifestyle Mod	0	1: Referred to CO	3	4	5	6: Referred to physician	7	8	9	10	11	12	13	14	15	16	17	18	19	20	21	22	23	24	25	26	27	28	29	30	31	32	33	34	35
E	Physician							x
	Clinical Officer			x	x	x	x
	Nurse	x	x
	Pharmacist		?	x	x	x	x	x
	Triage Staff/Technician	x	x	x	x	x	x	x
Level 1, change to Level 2 with no Rx, change to Level 0 after Rx by CO	Enrollment month	1	2	3	4	5	6	7	8	9	10	11	12	13	14	15	16	17	18	19	20	21	22	23	24	25	26	27	28	29	30	31	32	33	34	35	36
	HTN Rx month	0: Lifestyle Mod	0	1: Referred to CO	3	4	5	6: Referred to nurse after 3 consecutive visits w/ target BP, f/u every 2 mos x3 times	7	8	9	10	11	12: Target BP maintained after 3 visits, f/u every 4 mos	13	14	15	16	17	18	19	20	21	22	23	24	25	26	27	28	29	30	31	32	33	34	35
F	Physician
	Clinical Officer			x	x	x	x
	Nurse	x	x					x		x		x		x				x				x				x				x				x
	Pharmacist		?	x	x	x	x	x		x		x		x				x				x				x				x				x
	Triage Staff/Technician	x	x	x	x	x	x	x		x		x		x				x				x				x				x				x
Level 1, change to Level 2 with Rx, remains at Level 1 with Rx	Enrollment month	1	2	3	4	5	6	7	8	9	10	11	12	13	14	15	16	17	18	19	20	21	22	23	24	25	26	27	28	29	30	31	32	33	34	35	36
	HTN Rx month	0: Lifestyle Mod	1: HCTZ	2	3: Referred to CO	4	5	6	7: Referred to physician	8	9	10	11	12	13	14	15	16	17	18	19	20	21	22	23	24	25	26	27	28	29	30	31	32	33	34	35
G	Physician								x
	Clinical Officer				x	x	x	x
	Nurse	x	x	x
	Pharmacist		x	x	x	x	x	x	x
	Triage Staff/Technician	x	x	x	x	x	x	x	x
Level 1, change to Level 2 with Rx, change to Level 0 after Rx by CO	Enrollment month	1	2	3	4	5	6	7	8	9	10	11	12	13	14	15	16	17	18	19	20	21	22	23	24	25	26	27	28	29	30	31	32	33	34	35	36
	HTN Rx month	0: Lifestyle Mod	1: HCTZ	2	3: Referred to CO	4	5	6	7: Referred to nurse after 3 consecutive visits w/ target BP, f/u every 2 mos x3 times	8	9	10	11	12	13: Target BP maintained after 3 visits, f/u every 4 mos	14	15	16	17	18	19	20	21	22	23	24	25	26	27	28	29	30	31	32	33	34	35
H	Physician
	Clinical Officer				x	x	x	x
	Nurse	x	x	x					x		x		x		x				x				x				x				x				x
	Pharmacist		x	x	x	x	x	x	x		x		x		x				x				x				x				x				x
	Triage Staff/Technician	x	x	x	x	x	x	x	x		x		x		x				x				x				x				x				x
Level 2, then remains at Level 1 with Rx	Enrollment month	1	2	3	4	5	6	7	8	9	10	11	12	13	14	15	16	17	18	19	20	21	22	23	24	25	26	27	28	29	30	31	32	33	34	35	36
	HTN Rx month	1	2: Referred to CO	3	4	5	6: Referred to physician	7	8	9	10	11	12	13	14	15	16	17	18	19	20	21	22	23	24	25	26	27	28	29	30	31	32	33	34	35	36
	Physician						x
	Clinical Officer		x	x	x	x
	Nurse	x
	Pharmacist	x	x	x	x	x	x
	Triage Staff/Technician	x	x	x	x	x	x
Level 2, change to Level 0 with Rx	Enrollment month	1	2	3	4	5	6	7	8	9	10	11	12	13	14	15	16	17	18	19	20	21	22	23	24	25	26	27	28	29	30	31	32	33	34	35	36
	HTN Rx month	1	2: Referred to CO	3	4	5	6: Referred to nurse after 3 consecutive visits w/ target BP, f/u every 2 mos x3 times	7	8	9	10	11	12: Target BP maintained after 3 visits, f/u every 4 mos	13	14	15	16	17	18	19	20	21	22	23	24	25	26	27	28	29	30	31	32	33	34	35	36
	Physician
	Clinical Officer		x	x	x	x
	Nurse	x					x		x		x		x				x				x				x				x				x				x
	Pharmacist	x	x	x	x	x	x		x		x		x				x				x				x				x				x				x
	Triage Staff/Technician	x	x	x	x	x	x		x		x		x				x				x				x				x				x				x
Level 3, then remains at Level 1 with Rx	Enrollment month	1	2	3	4	5	6	7	8	9	10	11	12	13	14	15	16	17	18	19	20	21	22	23	24	25	26	27	28	29	30	31	32	33	34	35	36
	HTN Rx month	1	2: Referred to CO	3	4	5	6: Referred to physician	7	8	9	10	11	12	13	14	15	16	17	18	19	20	21	22	23	24	25	26	27	28	29	30	31	32	33	34	35	36
	Physician						x
	Clinical Officer		x	x	x	x
	Nurse	x
	Pharmacist	x	x	x	x	x	x
	Triage Staff/Technician	x	x	x	x	x	x
Level 3, change to Level 0 after Rx	Enrollment month	1	2	3	4	5	6	7	8	9	10	11	12	13	14	15	16	17	18	19	20	21	22	23	24	25	26	27	28	29	30	31	32	33	34	35	36
	HTN Rx month	1	2: Referred to CO	3	4	5	6: Referred to nurse after 3 consecutive visits w/ target BP, f/u every 2 mos x3 times	7	8	9	10	11	12: Target BP maintained after 3 visits, f/u every 4 mos	13	14	15	16	17	18	19	20	21	22	23	24	25	26	27	28	29	30	31	32	33	34	35	36
	Physician
	Clinical Officer		x	x	x	x
	Nurse	x					x		x		x		x				x				x				x				x				x				x
	Pharmacist	x	x	x	x	x	x		x		x		x				x				x				x				x				x				x
	Triage Staff/Technician	x	x	x	x	x	x		x		x		x				x				x				x				x				x				x
Level 4, then remains at Level 1 with Rx	Enrollment month	1	2	3	4	5	6	7	8	9	10	11	12	13	14	15	16	17	18	19	20	21	22	23	24	25	26	27	28	29	30	31	32	33	34	35	36
	HTN Rx month	1	2: Referred to CO	3	4	5	6: Referred to physician	7	8	9	10	11	12	13	14	15	16	17	18	19	20	21	22	23	24	25	26	27	28	29	30	31	32	33	34	35	36
	Physician						x
	Clinical Officer		x	x	x	x
	Nurse	x
	Pharmacist	x	x	x	x	x	x
	Triage Staff/Technician	x	x	x	x	x	x
Level 4, change to Level 0 after Rx	Enrollment month	1	2	3	4	5	6	7	8	9	10	11	12	13	14	15	16	17	18	19	20	21	22	23	24	25	26	27	28	29	30	31	32	33	34	35	36
	HTN Rx month	1	2: Referred to CO	3	4	5	6: After 3 consecutive visits w/ target BP, f/u every 2 mos x3 times	7	8	9	10	11	12: Target BP maintained after 3 visits, f/u every 4 mos	13	14	15	16	17	18	19	20	21	22	23	24	25	26	27	28	29	30	31	32	33	34	35	36
	Physician
	Clinical Officer		x	x	x	x	x		x		x		x				x				x				x				x				x				x
	Nurse	x
	Pharmacist	x	x	x	x	x	x		x		x		x				x				x				x				x				x				x
	Triage Staff/Technician	x	x	x	x	x	x		x		x		x				x				x				x				x				x				x
Level 5, on ACEi, no change with Rx	Enrollment month	1	2	3	4	5	6	7	8	9	10	11	12	13	14	15	16	17	18	19	20	21	22	23	24	25	26	27	28	29	30	31	32	33	34	35	36
	HTN Rx month	1: Start Enalapril 5mg BD	2: Enalapril 5mg BD	3: Enalapril 5mg BD	4: Enalapril 20mg BD	5: Enalapril 20mg BD	6: Enalapril 20 mg BD	7: +HCTZ	8: +HCTZ	9: +HCTZ	10: +Nifedipine	11: +Nifedipine	12: +Nifedipine	13: Target BP not met	14: Referred to physician	15	16	17	18	19	20	21	22	23	24	25	26	27	28	29	30	31	32	33	34	35	36
	Physician														x
	Clinical Officer	x	x	x	x	x	x	x	x	x	x	x	x	x
	Nurse
	Pharmacist	x	x	x	x	x	x	x	x	x	x	x	x	x	x
	Triage Staff/Technician	x	x	x	x	x	x	x	x	x	x	x	x	x	x
Level 5, on ARB, no change with Rx	Enrollment month	1	2	3	4	5	6	7	8	9	10	11	12	13	14	15	16	17	18	19	20	21	22	23	24	25	26	27	28	29	30	31	32	33	34	35	36
	HTN Rx month	1: Losartan	2: Losartan	3: Losartan	4: +HCTZ	5: +HCTZ	6: +HCTZ	7: +Nifedipine	8: +Nifedipine	9: +Nifedipine	10: Target BP not met	11: Referred to physician	12	13	14	15	16	17	18	19	20	21	22	23	24	25	26	27	28	29	30	31	32	33	34	35	36
	Physician											x
	Clinical Officer	x	x	x	x	x	x	x	x	x	x
	Nurse
	Pharmacist	x	x	x	x	x	x	x	x	x	x	x
	Triage Staff/Technician	x	x	x	x	x	x	x	x	x	x	x
Level 6	Enrollment month	1	2	3	4	5	6	7	8	9	10	11	12	13	14	15	16	17	18	19	20	21	22	23	24	25	26	27	28	29	30	31	32	33	34	35	36
	HTN Rx month	1	2: Referred to physician
	Physician		x
	Clinical Officer
	Nurse	x
	Pharmacist	x	x
	Triage Staff/Technician	x	x
